# Supplementary material for: Relationship between life satisfaction and preventable hospitalisations: a population-based cohort study in Ontario, Canada
Source: PubMed Central journal article supplement — BMJ Open. 2020 Feb 25;10(2):e032837. doi: 10.1136/bmjopen-2019-032837 (PMC7045202; doi:10.1136/bmjopen-2019-032837), 2020-02-25

Supplement Table 1:

ICD-10-CA/ CCI codes for ACSC hospitalizations<sup>1</sup>

| Condition                                                                                                                                                                                                                                                                                                                                                                                                                                                                                                                                                                                                                                                                                                                                                                                                                                                                                                                                                                                                                              | ICD-10-CA Code(s)                                                                                                                                                    |
|----------------------------------------------------------------------------------------------------------------------------------------------------------------------------------------------------------------------------------------------------------------------------------------------------------------------------------------------------------------------------------------------------------------------------------------------------------------------------------------------------------------------------------------------------------------------------------------------------------------------------------------------------------------------------------------------------------------------------------------------------------------------------------------------------------------------------------------------------------------------------------------------------------------------------------------------------------------------------------------------------------------------------------------|----------------------------------------------------------------------------------------------------------------------------------------------------------------------|
| Grand mal status and other epileptic convulsions                                                                                                                                                                                                                                                                                                                                                                                                                                                                                                                                                                                                                                                                                                                                                                                                                                                                                                                                                                                       | G40, G41                                                                                                                                                             |
| Chronic obstructive pulmonary disease (COPD)                                                                                                                                                                                                                                                                                                                                                                                                                                                                                                                                                                                                                                                                                                                                                                                                                                                                                                                                                                                           | J41, J42, J43, J44, J47<br><br>(only when a secondary diagnosis of J44 is also present) J10.0, J11.0, J12–J16, J18, J20, J21, J22                                    |
| Asthma                                                                                                                                                                                                                                                                                                                                                                                                                                                                                                                                                                                                                                                                                                                                                                                                                                                                                                                                                                                                                                 | J45                                                                                                                                                                  |
| Diabetes                                                                                                                                                                                                                                                                                                                                                                                                                                                                                                                                                                                                                                                                                                                                                                                                                                                                                                                                                                                                                               | E10.0, E10.1, E10.63, E10.64, E10.9<br><br>E11.0, E11.1, E11.63, E11.64, E11.9<br><br>E13.0, E13.1, E13.63, E13.64, E13.9<br><br>E14.0, E14.1, E14.63, E14.64, E14.9 |
| Hypertension*                                                                                                                                                                                                                                                                                                                                                                                                                                                                                                                                                                                                                                                                                                                                                                                                                                                                                                                                                                                                                          | I10.0, I10.1, I11                                                                                                                                                    |
| Heart Failure and pulmonary edema                                                                                                                                                                                                                                                                                                                                                                                                                                                                                                                                                                                                                                                                                                                                                                                                                                                                                                                                                                                                      | I50, J81                                                                                                                                                             |
| Angina*                                                                                                                                                                                                                                                                                                                                                                                                                                                                                                                                                                                                                                                                                                                                                                                                                                                                                                                                                                                                                                | I20, I23.82, I24.0, I24.8, I24.9                                                                                                                                     |
| <p>*Excluding cases with cardiac procedures, CCI codes for exclusion:</p> <p>1.HA.58.^, 1.HA.80.^, 1.HA.87.^, 1.HB.53.^, 1.HB.54.^, 1.HB.55.^, 1.HB.87.^, 1.HD.53.^, 1.HD.54.^, 1.HD.55.^, 1.HH.59.^, 1.HH.71.^, 1.HJ.76.^, 1.HJ.82.^, 1.HM.57.^, 1.HM.78.^, 1.HM.80.^, 1.HN.71.^, 1.HN.80.^, 1.HN.87.^, 1.HP.76.^, 1.HP.78.^, 1.HP.80.^, 1.HP.82.^, 1.HP.83.^, 1.HP.87.^, 1.HR.71.^, 1.HR.80.^, 1.HR.84.^, 1.HR.87.^, 1.HS.80.^, 1.HS.90.^, 1.HT.80.^, 1.HT.89.^, 1.HT.90.^, 1.HU.80.^, 1.HU.90.^, 1.HV.80.^, 1.HV.90.^, 1.HW.78.^, 1.HW.79.^, 1.HX.71.^, 1.HX.78.^, 1.HX.79.^, 1.HX.80.^, 1.HX.83.^, 1.HX.86.^, 1.HX.87.^, 1.HY.85.^, 1.HZ.53 rubric (except 1.HZ.53.LA-KP), 1.HZ.54.^, 1.HZ.55 rubric (except 1.HZ.55.LA-KP), 1.HZ.56.^, 1.HZ.57.^, 1.HZ.59.^, 1.HZ.80.^, 1.HZ.85.^, 1.HZ.87.^, 1.IF.83.^, 1.IJ.50.^, 1.IJ.54.GQ-AZ, 1.IJ.55.^, 1.IJ.57.^, 1.IJ.76.^, 1.IJ.80.^, 1.IJ.86.^, 1.IK.50.^, 1.IK.57.^, 1.IK.80.^, 1.IK.87.^, 1.IN.84.^, 1.LA.84.^, 1.LC.84.^, 1.LD.84.^, 1.YY.54.LA-NJ, 1.YY.54.LA-FS, 1.YY.54.LA-NM</p> |                                                                                                                                                                      |

<sup>1</sup> More information on CIHI methodology: <http://indicatorlibrary.cihi.ca/display/HSPIL/Ambulatory+Care+Sensitive+Conditions>

Supplement Table 2: Multivariable AHRs <sup>a</sup> and 95% CIs Across Sensitivity Analyses

|                                                                                                                                                                                                                                                                                                                                                                | Five-year survival <sup>b</sup> (N= 129,467) |            | Excluding events from first two years <sup>c</sup> (N= 128,638) |            |
|----------------------------------------------------------------------------------------------------------------------------------------------------------------------------------------------------------------------------------------------------------------------------------------------------------------------------------------------------------------|----------------------------------------------|------------|-----------------------------------------------------------------|------------|
|                                                                                                                                                                                                                                                                                                                                                                | HR (95% CI)                                  | p-value    | HR (95% CI)                                                     | p-value    |
| <b>Life Satisfaction</b>                                                                                                                                                                                                                                                                                                                                       |                                              |            |                                                                 |            |
| Very Satisfied                                                                                                                                                                                                                                                                                                                                                 | (ref)                                        | (ref)      | (ref)                                                           | (ref)      |
| Satisfied                                                                                                                                                                                                                                                                                                                                                      | 1.32 (1.16 – 1.51)                           | P < 0.0001 | 1.38 (1.17 – 1.62)                                              | P < 0.0001 |
| Neither Satisfied or Dissatisfied                                                                                                                                                                                                                                                                                                                              | 1.71 (1.36 – 2.14)                           | P < 0.0001 | 1.74 (1.33 – 2.28)                                              | P < 0.0001 |
| Dissatisfied and Very Dissatisfied                                                                                                                                                                                                                                                                                                                             | 2.74 (1.89 – 3.98)                           | P < 0.0001 | 2.77 (1.69 – 4.55)                                              | P < 0.0001 |
| <sup>a</sup> All models were fully adjusted models which controlled for age, sex, physical activity, BMI, alcohol consumption, smoking status.<br><sup>b</sup> Five-year survival models were run with a consistent survival time of five years.<br><sup>c</sup> Models were run without individuals who had an event within the first two years of follow-up. |                                              |            |                                                                 |            |

Supplement Table 3: Unadjusted HRs from The Subdistribution Hazard Model <sup>a</sup>

|                                                                                 | HR (95% CI)        | p-value    |
|---------------------------------------------------------------------------------|--------------------|------------|
| <b>Life Satisfaction</b>                                                        |                    |            |
| Very Satisfied                                                                  | (ref)              | (ref)      |
| Satisfied                                                                       | 1.44 (1.30 - 1.60) | P < 0.0001 |
| Neither Satisfied or Dissatisfied                                               | 2.20 (1.86 - 2.60) | P < 0.0001 |
| Dissatisfied and Very Dissatisfied                                              | 4.38 (3.73 - 5.14) | P < 0.0001 |
| <sup>a</sup> Subdistribution hazard model considered death as a competing risk. |                    |            |

Supplement Figure 1. Kaplan Meir survival curves for Life Satisfaction (most dissatisfied = 5; lease dissatisfied = 1)

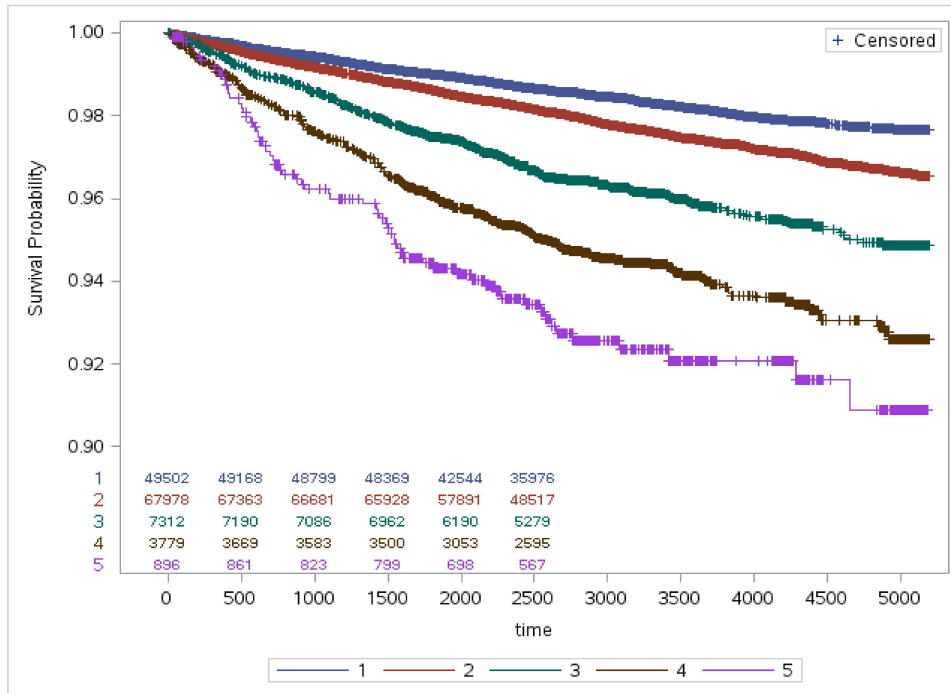

Supplement: bmjopen-2019-032837supp001.pdf [file bmjopen-2019-032837supp001.pdf]
