# Supplementary material for: Relationship between life satisfaction and preventable hospitalisations: a population-based cohort study in Ontario, Canada
Source: PubMed Central journal article supplement — BMJ Open. 2020 Feb 25;10(2):e032837. doi: 10.1136/bmjopen-2019-032837 (PMC7045202; doi:10.1136/bmjopen-2019-032837), 2020-02-25
Supplement: bmjopen-2019-032837.draft_revisions.pdf [file bmjopen-2019-032837.draft_revisions.pdf]

# BMJ Open

BMJ Open is committed to open peer review. As part of this commitment we make the peer review history of every article we publish publicly available.

When an article is published we post the peer reviewers' comments and the authors' responses online. We also post the versions of the paper that were used during peer review. These are the versions that the peer review comments apply to.

The versions of the paper that follow are the versions that were submitted during the peer review process. They are not the versions of record or the final published versions. They should not be cited or distributed as the published version of this manuscript.

BMJ Open is an open access journal and the full, final, typeset and author-corrected version of record of the manuscript is available on our site with no access controls, subscription charges or pay-per-view fees (<http://bmjopen.bmj.com>).

If you have any questions on BMJ Open's open peer review process please email [info.bmjopen@bmj.com](mailto:info.bmjopen@bmj.com)

# BMJ Open

## The relationship between life satisfaction and preventable hospitalizations: a population-based cohort study

|                               |                                                                                                                                                                                                                                                                                                                                                                                   |
|-------------------------------|-----------------------------------------------------------------------------------------------------------------------------------------------------------------------------------------------------------------------------------------------------------------------------------------------------------------------------------------------------------------------------------|
| Journal:                      | <i>BMJ Open</i>                                                                                                                                                                                                                                                                                                                                                                   |
| Manuscript ID                 | bmjopen-2019-032837                                                                                                                                                                                                                                                                                                                                                               |
| Article Type:                 | Research                                                                                                                                                                                                                                                                                                                                                                          |
| Date Submitted by the Author: | 08-Aug-2019                                                                                                                                                                                                                                                                                                                                                                       |
| Complete List of Authors:     | De Prophetis, Eric; University of Toronto, Dalla Lana School of Public Health<br>Goel, Vivek; University of Toronto, Dalla Lana School of Public Health; University of Toronto, Institute of Health Policy, Management and Evaluation<br>Watson, Tristan; Institute for Clinical Evaluative Sciences<br>Rosella, Laura; University of Toronto, Dalla Lana School of Public Health |
| Keywords:                     | Abulatory care sensitive conditions, Life Satisfaction, Avoidable hospitalization                                                                                                                                                                                                                                                                                                 |
|                               |                                                                                                                                                                                                                                                                                                                                                                                   |

SCHOLARONE™  
Manuscripts

1  
2  
3  
4 **The relationship between life satisfaction and preventable**  
5 **hospitalizations: a population-based cohort study**  
6

7 Eric De Prophetis<sup>a</sup>, MSc; Vivek Goel<sup>a,b</sup>, MD MSc; Tristan Watson<sup>b</sup>, MPH; Laura  
8 Rosella<sup>a,b,c</sup>, PhD, MHSc;  
9  
10

11  
12  
13 a Dalla Lana School of Public Health, University of Toronto, Toronto, ON, Canada

14 b ICES, Toronto, ON, Canada

15 c Public Health Ontario, Toronto, ON, Canada  
16  
17

18  
19 WORD COUNT: 3,417  
20

21 ADDRESS CORRESPONDANCE AND REPRINT REQUESTS TO:  
22

23  
24 Professor Laura Rosella  
25 University of Toronto  
26 155 College St  
27 Health Sciences Bldg, 6th floor  
28 Toronto, ON, M5T 3M7  
29 laura.rosella@utoronto.ca  
30  
31  
32  
33  
34  
35  
36  
37  
38  
39  
40  
41  
42  
43  
44  
45  
46  
47  
48  
49  
50  
51  
52  
53  
54  
55  
56  
57  
58  
59  
60

## Abstract

**Objective:** To examine if low life satisfaction is associated with an increased risk of being hospitalized for an ambulatory care sensitive condition (ACSC), in comparison to high life satisfaction

**Design and setting:** Population-based cohort study of adults from Ontario, Canada. Baseline data was captured through the Canadian Community Health Survey (CCHS) and linked to health administrative data for follow-up information.

**Participants:** 129,467 men and women between the ages of 18 to 74.

**Main outcome measures:** Time to avoidable hospitalizations defined by ACSCs.

**Results:** Life satisfaction was measured at baseline through the CCHS and follow-up information on ACSC hospitalizations were captured by linking participant respondents to hospitalization records covered under a single payer health system. Within the study timeframe (maximum of 14 years), 3037 individuals were hospitalized. Older men in the lowest household income quintile were more likely to be hospitalized with an ACSC. After controlling for age, sex, socioeconomic (SES), and other behavioural factors, low life satisfaction at baseline had a strong relationship with future hospitalizations for ACSCs (hazard ratio 2.71; 95% CI, 1.87-3.93). The hazards were highest for those who jointly had the lowest levels of life satisfaction and low household income (hazard ratio 3.80; 95% CI, 2.13-6.73). Results did not meaningful change after running a competing risk survival analysis.

**Conclusions:** This study demonstrates that poor life satisfaction is associated with hospitalizations for ACSCs after adjustment for several confounders. Furthermore, this relationship is experienced more severely for those who are more socioeconomically disadvantaged. This study adds to the existing literature around the significance of life satisfaction on health and the health system by documenting its impact on a health system, particularly for avoidable hospitalizations.

## Article Summary

### Strengths and limitations of the study

- Few studies have addressed hospitalizations for ambulatory care sensitive conditions (ACSC) as an outcome and those that do have often done so with diseased baseline cohorts.
- In the present study, poor life satisfaction was associated with an increased risk of future hospitalizations for an ACSC, a finding that persisted after controlling for socioeconomic status, behaviour risk factors, multi-morbidity and mental health factors.
- The influence of poor life satisfaction was stronger for those who were more socioeconomically disadvantaged compared to those with poor life satisfaction but not socioeconomically disadvantaged.
- Research on life satisfaction has shown it to be consistent over time; however, it is possible that life satisfaction could have changed during the study period, which was not captured in our study.
- This study did not directly address mechanisms by which life satisfaction can influence avoidable hospitalizations.

## Introduction

There has been broad recognition that upstream determinants have an influence on a range of health outcomes, including social determinants and risky health behaviours. However, subjective well-being, specifically life satisfaction is increasingly being recognized as playing an important role.(1-3) Many ambulatory care sensitive conditions (ACSC) are preventable resulting in potentially high amounts of healthcare resources if left unmanaged.(4, 5) Hospitalizations for these conditions (e.g., diabetes) are regarded as avoidable due to the relationship of timely access to primary care preventing complications and acute episodes.(5-7) In many countries, hospitalizations for these conditions are used as an indicator to measure the effectiveness of the healthcare system. (8)

Positive affect, which is the degree to which an individual experiences positive emotions (9), has been shown to be independently associated with reduced risk of coronary heart disease, even after adjustment for depressive symptoms. (10) Similarly, life satisfaction is associated with a reduced risk of various chronic conditions. (2, 11) Evidence from a recent prospective cohort study concluded lower life satisfaction was associated with a higher incidence of cancer, stroke, and type-2 diabetes. (11)

Research on life satisfaction has also recently shown to impact future high-health care use.(13) Specifically that individuals with lower life satisfaction had three times the odds of being in the top 5% of healthcare resource utilization.(13) However, another important system indicator that is absent from the current life satisfaction literature is avoidable hospitalizations, such as those caused by ACSCs. Given the evidence around the interrelationships between emotional factors and chronic-disease self-management (14) and in particular how emotional and psychological distress can influence the ability of a patient to manage their chronic condition (15, 16), more research is needed that quantitatively measures the impact of subjective well-being on the healthcare system.

Upon a recent search, only eight studies have were identified that fit the criteria of a similar exposure to life satisfaction and hospitalizations for one or more ACSC as an outcome. Previous studies mostly focused on singular conditions, with small sample sizes, limited follow-up time and clinical or convenience-based samples (17)(18). Regarding the length of follow-up, these ranged from six months (19) to four years (20). Considering many of the conditions regarded as ACSCs are also chronic diseases (e.g., diabetes) studies that accommodate a longer follow-up time necessary to allow for outcomes to be observed. Furthermore, hospitalizations for ACSCs are a relatively rare event in Canada where people with an ACSC hospitalization constitutes only 0.4% of the population aged 12 to 74 (21), and therefore, the limited sample sizes in previous studies may not be sufficient to observe an effect. We address these limitations by conducting the largest large population-based cohort study to date, to improve our understanding of this relationship.

1  
2  
3 The primary objective of this study was to determine if poor life satisfaction increased the risk of  
4 being hospitalized for an ACSC in a relatively healthy baseline cohort among an adult  
5 population.  
6  
7

## 8 Methods

### 9 Participants

10 The study was a longitudinal population-based cohort study of adult Ontario participants of the  
11 Canadian Community Health Survey (CCHS) pooled across five cycles: Cycle 2.1 (2003-2004),  
12 Cycle 3.1 (2005-2006), Cycle (2007-2008), Cycle (2009-2010), and Cycle (2011-2012).  
13 Furthermore, the data was linked to population-based health administrative data held at ICES.  
14 These data sources capture all hospitalization records for every person living in the province of  
15 Ontario covered under the single-payer health system. The CCHS is a cross-sectional survey  
16 administered by Statistics Canada, representative of 98% of the Canadian population aged  $\geq 12$   
17 years living in private dwellings with response rates  $>75\%$ .(22) Detailed survey methodology is  
18 available elsewhere. (23)  
19  
20  
21  
22  
23

24 Eighty percent of the CCHS survey respondents consented to have their data linked to the single-  
25 payer health insurance data, referred to as the Ontario Health Insurance Plan (OHIP), which  
26 captures all related healthcare encounters. All survey respondents were linked to Ontario's  
27 population registry, the Registered Persons Database (RPDB), which captures core demographic  
28 and clinical information as well as death, in addition to the Discharge Abstract Database (DAD).  
29 The analytic sample included adults (aged 18 to 74) who reported on life satisfaction and did not  
30 have an ACSC-related hospitalization in the two years before their CCHS interview date (**Figure**  
31 **1**).  
32  
33  
34

### 35 Measures

36 Self-reported life satisfaction, the primary exposure variable, is captured from CCHS. The  
37 question that respondents answered regarding life satisfaction was, "*How satisfied are you with*  
38 *your life in general?*" With response options being: *very satisfied, satisfied, neither satisfied nor*  
39 *dissatisfied, dissatisfied, or very dissatisfied*. Due to small sample sizes within each category, we  
40 collapsed the categories of dissatisfied and very dissatisfied. Furthermore, we did not  
41 hypothesize significant conceptual differences between these two categories related to  
42 hospitalizations for ACSCs.  
43  
44  
45  
46

47 The primary outcome variable was hospitalizations for an ACSC, which we used as a composite  
48 outcome. The ACSCs that we chose to report on are grand mal status and other epileptic  
49 convulsions, chronic obstructive pulmonary disease, asthma, diabetes, heart failure and  
50 pulmonary edema, hypertension, and angina. These conditions are in accordance with the  
51 Canadian Institute for Health Information's (CIHI) methodology (24) were chosen as our  
52 primary focus. See **Supplement Table 1** for the list of included conditions and their  
53 corresponding ICD-10 codes.  
54  
55  
56  
57  
58  
59  
60

1  
2  
3 Aggregate diagnosis groups (ADGs<sup>®</sup>)(25) were captured through administrative data as a  
4 summary measure of comorbidity and are based on the Johns Hopkins ACG<sup>®</sup> System, which is a  
5 person-focused, diagnosis-based method of categorizing subjects' illnesses [22]. ADGs have  
6 previously been used and validated as a reliable method of comorbidity adjustment in the Ontario  
7 population (26), and we used Version 10.0.1 in this analysis. Additionally, we used the Ontario  
8 Marginalization Index (ON-Marg) as a measure of socioeconomic status. The ON-Marg is a  
9 census-based, geographically derived index that was used to calculate area-level material  
10 deprivation.(27) Specifically, the material deprivation dimension measures the proportion of the  
11 population within a geographic region that is low income, without high school diploma, lone  
12 parent families, receiving government transfer payments, unemployed, and living in dwellings in  
13 need of repair. All other important covariates were captured through self-report from the CCHS  
14 interview questions.  
15  
16  
17  
18

### 19 CCHS Variables

20  
21 Household income quintile categorizes individuals based on their total household income in  
22 addition to the number of individuals living in the household. Individuals are then ranked from  
23 the lowest levels of household income (*Q1*) to the highest (*Q5*). Body Mass Index (BMI) was  
24 categorized into five categories ranging from “underweight” (BMI less than 18.5) to “severely  
25 obese” (BMI greater than 34.9). Physical activity was based on an individual's daily energy  
26 expenditure and further categorized into three levels: active, moderately active and inactive.  
27 Smoking status measured an individuals' past and present smoking habits by considering both  
28 the total amount of cigarettes smoked and the type of smoker they are (e.g., daily vs. occasional).  
29 This variable was categorized into three levels: current smoker, former smoker, never smoker.  
30 Alcohol consumption was based on the participant's sex and the quantity of alcohol consumed  
31 each day. This variable was then categorized into four levels: heavy drinker, moderate drinker,  
32 light drinker and never drinker. Mood disease was captured through the CCHS interview  
33 question “have you ever been diagnosed by a health professional for depression, bipolar disorder,  
34 mania or dysthymia?” This variable was used to control for depression. Anxiety disorder, which  
35 was captured through the question: “have you ever been diagnosed by a health professional for  
36 an anxiety disorder such as a phobia, obsessive-compulsive disorder, or panic disorder?”  
37 Education level is a derived variable which indicates the highest level of education acquired by  
38 the participant; this variable was explored as a potential indicator for SES.  
39  
40  
41  
42  
43  
44  
45

### 46 Statistical Analysis

47 We calculated the distribution of demographic, socioeconomic, health status and behaviour  
48 characteristics according to ACSCs and life satisfaction. Excluding those with an ACSC in the  
49 year prior allowed for the investigation of the upstream determinants (i.e. the factors associated  
50 with future development of an ACSC hospitalization in a cohort who were without a recent  
51 hospitalization for one of these conditions).  
52  
53  
54  
55  
56  
57  
58  
59  
60



1  
2  
3 Cox proportional hazards models were used to estimate the hazards associated with baseline life  
4 satisfaction on the risk of being hospitalized for an ACSC. Time is defined as survey date until  
5 disease or censoring for study endpoint (max follow up until March 31, 2017) or death. We  
6 calculated unadjusted, age-sex-adjusted, minimally adjusted and fully adjusted models. The  
7 minimally adjusted model controlled for age, sex and household income while the fully adjusted  
8 model included age, sex, household income, smoking status, alcohol consumption, physical  
9 activity and BMI. We ran three additional models which controlled for ADG score, mood  
10 disease, and anxiety separately in order to quantify their independent effects on the fully adjusted  
11 model. The models were used to quantify the association between life satisfaction and the hazard  
12 of being hospitalized for an ACSC using “very satisfied” as the referent category.  
13  
14  
15  
16

17 A joint-effects model was used to test if the relationship between life satisfaction and avoidable  
18 hospitalizations varied by SES. A joint-effects variable, which contains each combination of life  
19 satisfaction and household income, was included in the model while controlling for age, sex,  
20 smoking status, alcohol consumption, physical activity and BMI.  
21  
22

23 We ran sensitivity analyses by re-running the fully adjusted model with a consistent survival  
24 time of five years. Additionally, models for individuals who did not have an event in the first two  
25 years of the study were run to control for undocumented comorbidity. Finally, the subdistribution  
26 hazards model, which was initially developed by Fine and Gray (28), was run to test the  
27 possibility of death behaving as a competing risk.  
28  
29  
30

31 Survey and bootstrap sampling weights provided by Statistics Canada were applied to the  
32 analyses to account for the complex survey design of the CCHS.(29) The bootstrap sampling  
33 weights were applied using balanced repeated replication, in order to properly calculate  
34 confidence intervals. Additionally, this project received ethics approval from the Health Sciences  
35 Research Ethics Board at the University of Toronto (Ref # 36123, 15 August 2018). Finally, all  
36 statistical analyses were performed in 2018 and 2019 using SAS version 9.4.  
37  
38  
39

## 40 Patient Involvement

41 Patients were not involved in the development of the research question, outcome measures,  
42 recruitment, design or the implementation of the study objectives. Furthermore, no patients were  
43 consulted on the interpretation of results, and there are no plans to disseminate the results of this  
44 study to the relevant participants or their communities.  
45  
46  
47

## 48 Results

49 After combining the five cycles of data linked to the Registered Persons Database and excluding  
50 those less than 18, older than 74, in multiple survey cycles, missing life satisfaction, had an  
51 ACSC related hospitalization in the two years before the start of the study resulted in 129,467  
52 individuals remaining. Those who experienced an ACSC-related hospitalization two years before  
53 their survey interview date were removed to examine the impact of life satisfaction on future  
54 hospitalizations for an ACSC and reduce the possibility of reverse causality (**Figure 1**). In the  
55  
56  
57  
58  
59  
60

case of people in multiple survey cycles (n=1,589), we used the earliest survey response. Each respondent was followed for a maximum of 14 years or until the study end date, after which we determined that 3,037 individuals had experienced an ACSC-related hospitalization.

Figure 1: Flow chart of study participants

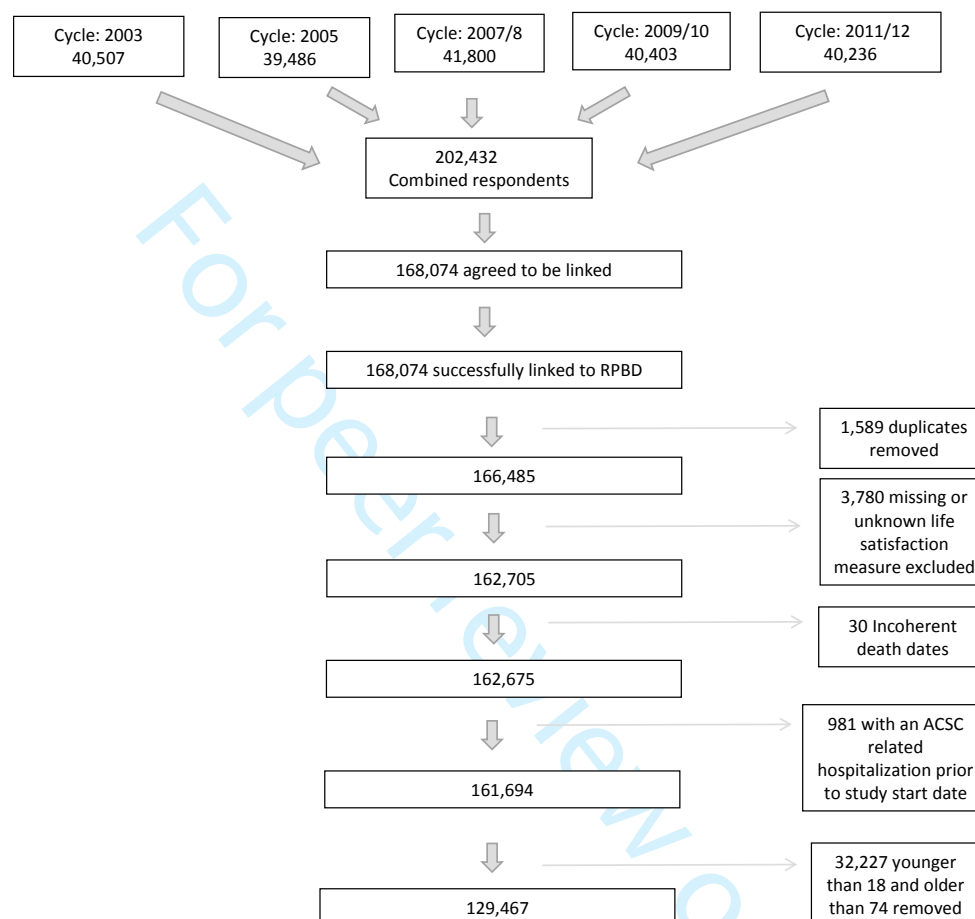

Older men in the lowest household income quintile were more likely to be hospitalized with an ACSC. Also, individuals with a higher degree of comorbidity as measured by a higher ADG score and the presence of behavioural risk factors such as smoking and physical inactivity were associated with being hospitalized for an ACSC (**Table 1**). Poor life satisfaction was associated with being older, less education, lower household income, higher ADG score, and higher disease-related risk factors such as smoking and physical inactivity (**Table 2**).

Life satisfaction had a strong unadjusted relationship with hospitalization for ACSC. **Table 3** presents the unadjusted and adjusted hazard ratios for the relationship between life satisfaction and ACSC-related hospitalizations, which include models that adjusted for age and sex, and then further adjusted for socioeconomic and lifestyle factors. Although full adjustment does reduce

1  
2  
3 the size of the effect, the hazard ratio of an individual with the lowest levels of life satisfaction  
4 (dissatisfied and very dissatisfied combined) compared to those who were very satisfied is 2.71  
5 (95% confidence interval 1.87 to 3.93). Interestingly, the observed relationship follows a dose-  
6 response pattern, or in other words, the hazard ratios increase in size for each decreasing level of  
7 life satisfaction. For example, in the fully adjusted model, the hazard ratio for the middle life  
8 satisfaction category (neither satisfied nor dissatisfied) was 1.71 (95% confidence interval 1.36  
9 to 2.14) while the satisfied category produced a hazard ratio of 1.32 (95% confidence interval  
10 1.15 to 1.50). Furthermore, the additional analyses (**Table 4**) that controlled for ADG score,  
11 mood disease and anxiety separately did not substantially reduce the observed effect sizes with  
12 the added adjusted of ADG score having the largest impact (hazard ratio of 2.42, 95%  
13 confidence interval of 1.68 to 3.51).  
14  
15  
16  
17

18 Regarding the joint effects model (**Table 6**), individuals who identified as having both low life  
19 satisfaction and low household income produced a fully adjusted hazard ratio of 3.80 (95%  
20 confidence interval 2.13 to 6.73). Therefore, in comparison to the fully adjusted model presented  
21 above (hazard ratio of 2.71), poor SES individuals are at an increased risk of being hospitalized  
22 when they are not satisfied with their lives.  
23  
24  
25

26 A range of sensitivity analyses were conducted to test the robustness of the study findings. Both  
27 the five-year survival model and the model which excluded individuals who had an event within  
28 the first two years did not change the effect sizes to a significant degree. The hazard ratios for the  
29 lowest levels of life satisfaction compared to those who were very satisfied were 2.74 and 2.77,  
30 respectively (**Supplement Table 2**). In the competing risk analysis (**Supplement Table 3**), the  
31 unadjusted hazard ratios produced in the subdistribution hazard model were similar to those  
32 produced in the final model (4.38 vs 4.51 respectively). Finally, we examined the impact of  
33 alternate measures of SES (**Supplement Table 4**), showing similar results, with the largest effect  
34 seen with household income, which was used in our primary analysis.  
35  
36  
37  
38

## 39 Discussion

40 Life satisfaction was shown to be associated with a range of health outcomes. However, little is  
41 known about how life satisfaction can impact health system indicators such as avoidable  
42 hospitalizations in a general population cohort. We investigated this relationship and accounted  
43 for a wide variety of clinical and behavioral risk factors. We saw robust findings that poor life  
44 satisfaction was shown to have strong independent relationship with future ACSC  
45 hospitalizations with the lowest levels of life satisfaction (dissatisfied and very dissatisfied)  
46 being associated with almost a three times higher hazard of an avoidable hospitalization  
47 compared to those who were very satisfied after accounting for numerous confounders.  
48  
49  
50  
51

52 Previous studies have linked life satisfaction and similar exposures (e.g. positive affect) to health  
53 outcomes such as stroke (11) and heart disease (10). Life satisfaction has also been shown to be  
54 associated with a wide variety of health behaviours. (30, 31) For instance, one study found that  
55  
56  
57  
58  
59

1  
2  
3 those who exercised more were generally happier. (32) Furthermore, life satisfaction has also  
4 been shown to be experienced differently across categories of socioeconomic status. (33) Due to  
5 the detailed survey variables available from the survey data and the linkage of these data to  
6 complete hospitalization outcomes from health administrative databases, these confounders  
7 in addition to objective measures of comorbidity were adjusted for in the analyses.  
8  
9

10 This study addresses an important gap in the literature by providing a robust population sample  
11 size and examining how life satisfaction related to a meaningful health system outcome. There  
12 are few studies that addresses life satisfaction or other forms of subjective well being as they  
13 relate to hospitalizations for ACSCs. Furthermore, the existing research is limited by small  
14 sample sizes and insufficient follow-up times. This study also has more direct implications for  
15 the health system given ACSCs are defined as conditions for which hospitalizations should be  
16 prevented, given timely and effective access to primary care. (7) Considering the preventable  
17 nature of these conditions, hospitalizations for ACSCs are an ineffective use of healthcare  
18 resources and insight into the risk factors for these conditions can help improve health system  
19 functioning.  
20  
21  
22  
23

24 Unlike previous studies, we measured baseline life satisfaction on a sample who did not have an  
25 ACSC hospitalization in the two years prior while also presenting analyses that controlled for  
26 comorbidity and therefore overcomes the criticism of other studies that that poor life satisfaction  
27 could have been the result of the bidirectional relationship between poor health and life  
28 satisfaction. A possible explanation for the observed results is that individuals who experience  
29 poor life satisfaction tend to have higher rates of depression, given its observed relationship with  
30 poor health outcomes. (34, 35) To address this, we further adjusted for mood disease and found  
31 that this has little effect on attenuated the observed association.  
32  
33  
34  
35

### 36 Limitations

37 We acknowledge that there are some limitations and interpretive cautions in this study. First, this  
38 study was an observational study, although we controlled for several potential confounders and  
39 excluded those with a recent history of ACSC at baseline through linkage, we cannot rule out the  
40 possibility of unmeasured or residual confounding. We note however that the effect sizes are  
41 large, and this study did control for many more confounders than previous studies through a  
42 combination of survey data in addition to health administrative variables to capture comorbidity.  
43 Second, we measured life satisfaction at one point in time (survey interview date). Research on  
44 life satisfaction has shown it to be consistent over time (36); however, it is possible that life  
45 satisfaction could have changed during the study period. Therefore, we only capture the effect  
46 from that initial time point and cannot account for the influence of changes in life satisfaction  
47 that happen following the baseline assessment. Furthermore, there are other instruments that can  
48 be used to assess life satisfaction that were not available in this study. Finally, life satisfaction is  
49 a subjective measure. It has been shown to be an accurate and robust measure of happiness, it is  
50 still up to the individuals to judge and reflect on their life satisfaction. This means that its  
51  
52  
53  
54  
55  
56  
57  
58  
59  
60

1  
2  
3 meaning can differ based on the individual resulting in variation in the exposure. Despite these  
4 limitations, this study has still provided an essential contribution to the literature by being one of  
5 the first assessments of life satisfaction on avoidable hospitalization that utilizes a longitudinal  
6 population-based study design while measuring this exposure before the disease outcome.  
7  
8

### 9 Mechanisms

10 This study did not directly address mechanisms by which life satisfaction can influence  
11 avoidable hospitalizations; however, these have been studied by others. Out of the existing  
12 literature, there seem to be three main mechanisms that could help explain the observed  
13 relationship between life satisfaction and health: behavioural, health service use, and biological.  
14 Subjective well-being has been shown to impact a variety of health behaviours, such as increased  
15 physical activity (37-40) and reduced smoking habits (40). However, many of these studies  
16 lacked proper adjustment of confounding variables such as SES and psychological distress.(40)  
17 Regarding health service use, a study from 2014 found that participants who were identified as  
18 having a greater purpose in life were more likely to receive preventative health services such as  
19 mammograms or colonoscopies.(41) What remains to be seen regarding this mechanism is  
20 whether the use of these services reflects access to primary care, or the decisions made by the  
21 individuals themselves to seek these services. However, a recent population-based cohort study  
22 noted how hospitalizations for ACSCs could not be explained by a lack of access to primary care  
23 (42), and therefore we could perhaps interpret the impacts of this mechanism as a result of  
24 individual decisions that are influenced by their satisfaction with life. Finally, biological  
25 mechanisms could also play a contributing role. A recent meta-analysis noted how individuals  
26 who were identified as having greater psychological well-being experienced favourable lipid  
27 profiles.(43) However, these associations were largely mitigated once behavioural characteristics  
28 were taken into account.(43)  
29  
30  
31  
32  
33  
34  
35

### 36 Conclusions

37 This study demonstrates that life satisfaction is associated with hospitalizations for ACSCs, even  
38 after controlling for socioeconomic characteristics, health behaviours, comorbidities and mental  
39 health factors. Furthermore, more socioeconomically deprived individuals were shown to be at  
40 an increased risk. While governments plan to improve the sustainability and functioning of their  
41 health systems, understanding the factors that contribute to costly and preventable conditions  
42 such as ACSCs is vital. The findings of this study suggest that broader considerations, such as  
43 self-perception of happiness and satisfaction, can impact potentially avoidable hospitalizations,  
44 which represent a burden to the individual and healthcare systems. Further research in this area  
45 may contribute to the development of broader approaches to reduce potentially avoidable burden  
46 on the health system.  
47  
48  
49  
50  
51  
52  
53  
54  
55  
56  
57  
58  
59  
60

## Tables

Table 1: Weighted<sup>a</sup> distributions of baseline characteristics across five levels of life satisfaction (N= 129,467)

|                                          | Very Satisfied (N= 49,502) | Satisfied (N= 67,978) | Neither Satisfied or Dissatisfied (N= 7,312) | Dissatisfied (N= 3,779) | Very Dissatisfied (N= 896) | Unweighted N's |
|------------------------------------------|----------------------------|-----------------------|----------------------------------------------|-------------------------|----------------------------|----------------|
| <b>ACSC Hospitalization</b>              |                            |                       |                                              |                         |                            |                |
| Yes                                      | 1.12                       | 1.61                  | 2.51                                         | 4.81                    | 5.39                       | 3,037          |
| No                                       | 98.88                      | 98.39                 | 97.49                                        | 95.19                   | 94.61                      | 126,430        |
| <b>Sex</b>                               |                            |                       |                                              |                         |                            |                |
| Male                                     | 47.5                       | 50.53                 | 47.34                                        | 49.93                   | 47.32                      | 59,292         |
| Female                                   | 52.5                       | 49.47                 | 52.66                                        | 50.07                   | 52.68                      | 70,175         |
| <b>Age group</b>                         |                            |                       |                                              |                         |                            |                |
| 18-34                                    | 30.64                      | 33.09                 | 30.78                                        | 23.91                   | 14.53                      | 35,255         |
| 35-49                                    | 31.9                       | 33.21                 | 31.14                                        | 36.12                   | 33.6                       | 35,063         |
| 50-64                                    | 26.31                      | 24.97                 | 27.37                                        | 31.04                   | 41.39                      | 38,662         |
| 65-74                                    | 11.15                      | 8.72                  | 10.7                                         | 8.93                    | 10.49                      | 20,487         |
| <b>BMI</b>                               |                            |                       |                                              |                         |                            |                |
| Underweight < 18.5                       | 2.22                       | 2.79                  | 3.79                                         | 4.08                    | 3.35                       | 2,674          |
| Normal weight, 18.5-24.9                 | 46.83                      | 46.02                 | 43.31                                        | 39.31                   | 37.18                      | 53,327         |
| Overweight, 25-29.9                      | 35.48                      | 33.55                 | 32.37                                        | 31.78                   | 32.34                      | 43,915         |
| Moderately obese, 30-34.9                | 11.72                      | 12.44                 | 13.15                                        | 15.62                   | 16.57                      | 17,840         |
| Severely obese, > 34.9                   | 3.75                       | 5.2                   | 7.38                                         | 9.22                    | 10.57                      | 7,815          |
| <b>ADG<sup>®</sup> Score<sup>b</sup></b> |                            |                       |                                              |                         |                            |                |
| Mean (95% CI)                            | 3.42 (3.31 - 3.54)         | 3.95 (3.84 - 4.06)    | 5.76 (5.35 - 6.18)                           | 7.29 (6.712 - 7.88)     | 10.13 (8.76 - 11.49)       | -              |
| <b>Physical Activity Status</b>          |                            |                       |                                              |                         |                            |                |
| Active                                   | 32.24                      | 24.09                 | 18.2                                         | 16.94                   | 14.95                      | 35,482         |
| Moderate                                 | 27.08                      | 24.73                 | 19.25                                        | 18.8                    | 14.5                       | 33,791         |
| Inactive                                 | 40.65                      | 51.14                 | 62.22                                        | 64.2                    | 70.55                      | 60,149         |
| <b>On-Marg Deprivation</b>               |                            |                       |                                              |                         |                            |                |
| 1 (Least Marginalized)                   | 24.86                      | 20.76                 | 12.81                                        | 15.84                   | 15.43                      | 23,405         |
| 2                                        | 22.03                      | 20.22                 | 18.21                                        | 15.72                   | 13.13                      | 25,427         |
| 3                                        | 19.84                      | 19.72                 | 18.93                                        | 19.23                   | 17.55                      | 26,391         |
| 4                                        | 16.74                      | 18.99                 | 22.71                                        | 20.01                   | 21.85                      | 26,386         |
| 5 (Most Marginalized)                    | 15.57                      | 19.29                 | 26.2                                         | 28.04                   | 31.52                      | 26,073         |
| <b>Education Level</b>                   |                            |                       |                                              |                         |                            |                |
| < secondary                              | 4.62                       | 6.52                  | 9.87                                         | 12.4                    | 12.91                      | 12,302         |
| Secondary grad                           | 10.79                      | 12.25                 | 13.65                                        | 12.78                   | 16.24                      | 18,047         |
| > secondary                              | 79.93                      | 75.6                  | 69.26                                        | 68.55                   | 61.28                      | 94,084         |

|                                                                                                                                                                                                                                       |       |       |       |       |       |         |
|---------------------------------------------------------------------------------------------------------------------------------------------------------------------------------------------------------------------------------------|-------|-------|-------|-------|-------|---------|
| Unknown                                                                                                                                                                                                                               | 4.66  | 5.63  | 7.22  | 6.28  | 9.57  | 5,034   |
| <b>Alcohol Consumption</b>                                                                                                                                                                                                            |       |       |       |       |       |         |
| Heavy Drinker                                                                                                                                                                                                                         | 7.94  | 8.62  | 8.08  | 9.11  | 11.6  | 11,502  |
| Moderate Drinker                                                                                                                                                                                                                      | 24.62 | 20.19 | 15.43 | 12.57 | 7.58  | 17,934  |
| Light Drinker                                                                                                                                                                                                                         | 15.37 | 13.61 | 11.42 | 9.26  | 7.44  | 28,413  |
| Never Drinker                                                                                                                                                                                                                         | 50.79 | 56.33 | 63.66 | 67.55 | 71.93 | 69,785  |
| <b>Smoking Status</b>                                                                                                                                                                                                                 |       |       |       |       |       |         |
| Current Smoker                                                                                                                                                                                                                        | 17.38 | 22.71 | 31.65 | 36.52 | 43.75 | 30,875  |
| Former Smoker                                                                                                                                                                                                                         | 22.92 | 20.53 | 17.48 | 19.76 | 19.43 | 32,623  |
| Never Smoked                                                                                                                                                                                                                          | 56.06 | 53.48 | 48.15 | 40.86 | 34.91 | 61,357  |
| <b>Immigrant Status</b>                                                                                                                                                                                                               |       |       |       |       |       |         |
| Yes                                                                                                                                                                                                                                   | 26.22 | 33.84 | 40.73 | 36.21 | 29.25 | 25,228  |
| No                                                                                                                                                                                                                                    | 72.5  | 64.24 | 57.2  | 61.64 | 67.89 | 102,911 |
| <b>Household Income Quintile</b>                                                                                                                                                                                                      |       |       |       |       |       |         |
| Q1 (Lowest Income)                                                                                                                                                                                                                    | 9.5   | 14.16 | 23.52 | 32.29 | 38.88 | 17,369  |
| Q2                                                                                                                                                                                                                                    | 12.19 | 15.72 | 18.68 | 16.97 | 15.92 | 18,687  |
| Q3                                                                                                                                                                                                                                    | 16.34 | 17.68 | 16.93 | 15.25 | 15.41 | 24,063  |
| Q4                                                                                                                                                                                                                                    | 22.29 | 21.61 | 16.05 | 13.11 | 12.73 | 29,029  |
| Q5 (Highest Income)                                                                                                                                                                                                                   | 30.74 | 20.71 | 12.36 | 11.18 | 7.92  | 31,515  |
| Unknown                                                                                                                                                                                                                               | 8.94  | 10.12 | 12.47 | 11.2  | 9.13  | 8,804   |
| <p><sup>a</sup> Weighted through surveysampling weights provided by Statistics Canada.</p> <p><sup>b</sup> ADG<sup>®</sup> Score is a weighted score based on an individual's ADGs. This method has been validated elsewhere.(26)</p> |       |       |       |       |       |         |

Table 2: Weighted<sup>a</sup> distributions of baseline characteristics according to hospitalization for an ACSC (N= 129,467)

|                            | ACSC Hospitalization Yes (N= 3,037) | ACSC Hospitalization No (N= 126,430) | Unweighted N's | Standardized Difference |
|----------------------------|-------------------------------------|--------------------------------------|----------------|-------------------------|
| <b>Sex</b>                 |                                     |                                      |                |                         |
| Male                       | 56.12                               | 49.09                                | 59,292         | 0.06                    |
| Female                     | 43.88                               | 50.91                                | 70,175         | 0.14                    |
| <b>Age group</b>           |                                     |                                      |                |                         |
| 18-34                      | 9.35                                | 32.07                                | 35,255         | 0.58                    |
| 35-49                      | 20.5                                | 32.89                                | 35,063         | 0.28                    |
| 50-64                      | 48.6                                | 25.49                                | 38,662         | 0.49                    |
| 65-74                      | 21.56                               | 9.55                                 | 20,487         | 0.34                    |
| <b>BMI</b>                 |                                     |                                      |                |                         |
| Underweight <18.5          | 2.19                                | 2.68                                 | 2,674          | 0.03                    |
| Normal Weight, 18.5 – 24.9 | 29.19                               | 46.2                                 | 53,327         | 0.36                    |
| Overweight, 25-29.9        | 33.96                               | 34.13                                | 43,915         | 0.00                    |
| Moderately obese, 30-34.9  | 21.39                               | 12.18                                | 17,840         | 0.25                    |
| Severely obese, >34.9      | 13.27                               | 4.8                                  | 7,815          | 0.30                    |

|                                                                                                                                      |                        |                      |         |      |
|--------------------------------------------------------------------------------------------------------------------------------------|------------------------|----------------------|---------|------|
| <b>ADG<sup>®</sup> Score<sup>b</sup></b>                                                                                             |                        |                      |         |      |
| Mean (95% CI)                                                                                                                        | 11.8<br>(11.04 -12.56) | 3.86<br>(3.77 -3.95) | -       | 0.35 |
| <b>Physical Activity Status</b>                                                                                                      |                        |                      |         |      |
| Active                                                                                                                               | 17.33                  | 26.64                | 35,482  | 0.23 |
| Moderate                                                                                                                             | 21.27                  | 25.12                | 33,791  | 0.09 |
| Inactive                                                                                                                             | 61.41                  | 48.2                 | 60,149  | 0.27 |
| <b>On-Marg Deprivation</b>                                                                                                           |                        |                      |         |      |
| (Least Deprived) 1                                                                                                                   | 14.91                  | 21.74                | 23,405  | 0.18 |
| 2                                                                                                                                    | 19.67                  | 20.62                | 25,427  | 0.02 |
| 3                                                                                                                                    | 16.62                  | 19.74                | 26,391  | 0.08 |
| (Most Deprived) 4                                                                                                                    | 21.42                  | 18.38                | 26,386  | 0.08 |
| <b>Education Level</b>                                                                                                               |                        |                      |         |      |
| Less than secondary                                                                                                                  | 19.16                  | 6.01                 | 12,302  | 0.40 |
| Secondary graduate                                                                                                                   | 15.18                  | 11.78                | 18,047  | 0.10 |
| More than secondary                                                                                                                  | 60.1                   | 76.81                | 94,084  | 0.37 |
| Unknown                                                                                                                              | 5.57                   | 5.4                  | 5,034   | 0.01 |
| <b>Alcohol Consumption</b>                                                                                                           |                        |                      |         |      |
| Heavy Drinker                                                                                                                        | 6.95                   | 8.39                 | 11,502  | 0.05 |
| Moderate Drinker                                                                                                                     | 16.37                  | 21.34                | 17,934  | 0.13 |
| Light Drinker                                                                                                                        | 9.67                   | 14.05                | 28,413  | 0.14 |
| Never Drinker                                                                                                                        | 65.23                  | 54.95                | 69,785  | 0.21 |
| <b>Smoking Status</b>                                                                                                                |                        |                      |         |      |
| Current Smoker                                                                                                                       | 36.7                   | 21.53                | 30,875  | 0.34 |
| Former Smoker                                                                                                                        | 29.26                  | 21.07                | 32,623  | 0.19 |
| Never Smoked                                                                                                                         | 31.09                  | 54.04                | 61,357  | 0.48 |
| <b>Immigrant Status</b>                                                                                                              |                        |                      |         |      |
| Yes                                                                                                                                  | 25.03                  | 31.59                | 25,228  | 0.15 |
| No                                                                                                                                   | 72.45                  | 66.71                | 102,911 | 0.13 |
| <b>Household Income</b>                                                                                                              |                        |                      |         |      |
| Q1 (Lowest Income)                                                                                                                   | 20.72                  | 13.51                | 17,369  | 0.19 |
| Q2                                                                                                                                   | 16.09                  | 14.61                | 18,687  | 0.04 |
| Q3                                                                                                                                   | 16.56                  | 17.07                | 24,063  | 0.01 |
| Q4                                                                                                                                   | 17.57                  | 21.31                | 29,029  | 0.09 |
| Q5 (Highest Income)                                                                                                                  | 18.58                  | 23.65                | 31,515  | 0.12 |
| Unknown                                                                                                                              | 10.48                  | 9.84                 | 8,804   | 0.02 |
| <sup>a</sup> Weighted through survey sampling weights provided by Statistics Canada.                                                 |                        |                      |         |      |
| <sup>b</sup> ADG <sup>®</sup> Score is a weighted score based on an individual's ADGs. This method has been validated elsewhere.(26) |                        |                      |         |      |

Table 3: Multivariable AHRs and 95% CIs From Proportional Hazards Regression (N= 129,467)

|                          | Unadjusted  |         | Age-Sex Adjusted |         |
|--------------------------|-------------|---------|------------------|---------|
|                          | HR (95% CI) | p-value | HR (95% CI)      | p-value |
| <b>Life Satisfaction</b> |             |         |                  |         |
| Very Satisfied           | (ref)       | ref     | (ref)            | ref     |



|                                                                                                                                               |                                 |            |                             |            |
|-----------------------------------------------------------------------------------------------------------------------------------------------|---------------------------------|------------|-----------------------------|------------|
| Satisfied                                                                                                                                     | 1.44 (1.27 - 1.64)              | P < 0.0001 | 1.56 (1.37 - 1.77)          | P < 0.0001 |
| Neither Satisfied or Dissatisfied                                                                                                             | 2.22 (1.79 - 2.76)              | P < 0.0001 | 2.37 (1.91 - 2.95)          | P < 0.0001 |
| Dissatisfied and Very Dissatisfied                                                                                                            | 4.51 (3.17 - 6.41)              | P < 0.0001 | 4.48 (3.16 - 6.34)          | P < 0.0001 |
|                                                                                                                                               | Minimally Adjusted <sup>a</sup> |            | Fully Adjusted <sup>b</sup> |            |
|                                                                                                                                               | HR (95% CI)                     | p-value    | HR (95% CI)                 | p-value    |
| <i>Life Satisfaction</i>                                                                                                                      |                                 |            |                             |            |
| Very Satisfied                                                                                                                                | (ref)                           | ref        | (ref)                       | ref        |
| Satisfied                                                                                                                                     | 1.48 (1.30 - 1.69)              | P < 0.0001 | 1.32 (1.15 - 1.50)          | P < 0.0001 |
| Neither Satisfied or Dissatisfied                                                                                                             | 2.11 (1.69 - 2.65)              | P < 0.0001 | 1.71 (1.36 - 2.14)          | P < 0.0001 |
| Dissatisfied and Very Dissatisfied                                                                                                            | 3.79 (2.66 - 5.41)              | P < 0.0001 | 2.71 (1.87 - 3.93)          | P < 0.0001 |
| HR – hazard ratio, AHR – adjusted hazard ratio, CI – confidence interval                                                                      |                                 |            |                             |            |
| <sup>a</sup> Minimally adjusted models controlled for age, sex and household income                                                           |                                 |            |                             |            |
| <sup>b</sup> Fully adjusted models controlled for age, sex, household income, physical activity, BMI, alcohol consumption and smoking status. |                                 |            |                             |            |

Table 4: Multivariable AHRs<sup>a</sup> and 95% CIs From Proportional Hazards Regression While Additionally Adjusting for ADG<sup>®</sup> score, Mood Disease and Anxiety (N= 129,467)

|                                                                                                                                                                        | Fully Adjusted with ADG <sup>®</sup> Score |            | Fully Adjusted with Mood Disease |            | Fully Adjusted with Anxiety |            |
|------------------------------------------------------------------------------------------------------------------------------------------------------------------------|--------------------------------------------|------------|----------------------------------|------------|-----------------------------|------------|
|                                                                                                                                                                        | HR (95% CI)                                | p-value    | HR (95% CI)                      | p-value    | HR (95% CI)                 | p-value    |
| <i>Life Satisfaction</i>                                                                                                                                               |                                            |            |                                  |            |                             |            |
| Very Satisfied                                                                                                                                                         | (ref)                                      | (ref)      | (ref)                            | (ref)      | (ref)                       | (ref)      |
| Satisfied                                                                                                                                                              | 1.28 (1.12 - 1.46)                         | 0.0004     | 1.30 (1.13 - 1.50)               | 0.0002     | 1.31 (1.14 - 1.49)          | 0.0001     |
| Neither Satisfied or<br>Dissatisfied                                                                                                                                   | 1.56 (1.25 - 1.96)                         | 0.0001     | 1.62 (1.29 - 2.05)               | P < 0.0001 | 1.65 (1.31 - 2.08)          | P < 0.0001 |
| Dissatisfied and Very<br>Dissatisfied                                                                                                                                  | 2.42 (1.68 - 3.51)                         | P < 0.0001 | 2.45 (1.68 - 3.55)               | P < 0.0001 | 2.52 (1.76 - 3.61)          | P < 0.0001 |
| HR – hazard ratio, CI – confidence interval                                                                                                                            |                                            |            |                                  |            |                             |            |
| <sup>a</sup> Both models controlled for age, sex, household income, physical activity, BMI, alcohol consumption, smoking status in addition to the variable specified. |                                            |            |                                  |            |                             |            |

Table 5: Multivariable AHRs and 95% CIs From Joint Effects Models (N= 129,467)

|                                                                                                                         | Unadjusted          |            | Fully Adjusted <sup>a</sup> |            |
|-------------------------------------------------------------------------------------------------------------------------|---------------------|------------|-----------------------------|------------|
|                                                                                                                         | HR (95% CI)         | p-value    | HR (95% CI)                 | p-value    |
| <b>Joint Effects</b>                                                                                                    |                     |            |                             |            |
| High Life Satisfaction and High Income                                                                                  | 1.00                | (ref)      | 1.00                        | (ref)      |
| High Life Satisfaction and Middle Income                                                                                | 1.40 (1.18 – 1.65)  | P < 0.0001 | 1.18 (0.99 – 1.40)          | 0.0581     |
| High Life Satisfaction and Low Income                                                                                   | 2.00 (1.66 – 2.42)  | P < 0.0001 | 1.63 (1.35 – 1.99)          | P < 0.0001 |
| Neither Satisfied Nor Dissatisfied and High Income                                                                      | 1.84 (1.16 – 2.93)  | 0.0099     | 1.55 (0.98 – 2.46)          | 0.0614     |
| Neither Satisfied Nor Dissatisfied and Middle Income                                                                    | 2.46 (1.84 – 3.29)  | P < 0.0001 | 1.92 (1.42 – 2.60)          | P < 0.0001 |
| Neither Satisfied Nor Dissatisfied and Low Income                                                                       | 2.44 (1.7 – 3.53)   | P < 0.0001 | 1.68 (1.16 – 2.45)          | 0.0067     |
| Low Life Satisfaction and High Income                                                                                   | 3.71 (1.08 – 12.78) | 0.0377     | 2.81 (0.80 – 9.91)          | 0.1068     |
| Low Life Satisfaction and Middle Income                                                                                 | 3.67 (2.67 – 5.03)  | P < 0.0001 | 2.30 (1.66 – 3.18)          | P < 0.0001 |
| Low Life Satisfaction and Low Income                                                                                    | 6.95 (3.91 – 12.38) | P < 0.0001 | 3.80 (2.13 – 6.73)          | P < 0.0001 |
| HR – hazard ratio, CI – confidence interval                                                                             |                     |            |                             |            |
| <sup>a</sup> Fully adjusted models controlled for age, sex, physical activity, BMI, alcohol consumption, smoking status |                     |            |                             |            |

**Contributors:** LCR and VG conceptualized the study, TW created the database and ED planned the analysis, analyzed the data, and drafted and revised the paper. LR is the guarantor. All authors contributed to the manuscript and revised the draft paper. All have approved the final version for publication.

1  
2  
3 **Funding:** This research was supported by a Canada Research Chair held by LCR (CRC-950-  
4 23072).  
5

6 **Disclaimer:** This study was supported by ICES, which is funded by an annual grant from the  
7 Ontario Ministry of Health and Long-Term Care. The opinions, results and conclusions reported  
8 in this paper are those of the authors and are independent from the funding sources.  
9

10  
11 **Competing interests:** None declared  
12

13  
14 **Data sharing statement:** The data set from this study is held securely in coded form at ICES.  
15 While data sharing agreements prohibit ICES from making the data set publicly available, access  
16 may be granted to those who meet prespecified criteria for confidential access (available at  
17 [www.ices.on.ca/DAS](http://www.ices.on.ca/DAS)). The full data set creation plan and underlying analytic code are available  
18 from the authors upon request, understanding that the programs may rely upon coding templates  
19 or macros that are unique to ICES.  
20  
21  
22  
23  
24  
25  
26  
27  
28  
29  
30  
31  
32  
33  
34  
35  
36  
37  
38  
39  
40  
41  
42  
43  
44  
45  
46  
47  
48  
49  
50  
51  
52  
53  
54  
55  
56  
57  
58  
59  
60

## References

1. Zaninotto P, Wardle J, Steptoe A. Sustained enjoyment of life and mortality at older ages: analysis of the English Longitudinal Study of Ageing. *BMJ*. 2016;355:i6267.
2. Boehm JK, Trudel-Fitzgerald C, Kivimaki M, Kubzansky LD. The prospective association between positive psychological well-being and diabetes. *Health Psychol*. 2015;34(10):1013-21.
3. Sabatini F. The relationship between happiness and health: evidence from Italy. *Soc Sci Med*. 2014;114:178-87.
4. Carrière GM, Kumar MB, Sanmartin C. Hospitalization for ambulatory care sensitive conditions among urban Métis adults. *Health Rep*. 2017;28(12):3-11.
5. Caminal J, Starfield B, Sánchez E, Casanova C, Morales M. The role of primary care in preventing ambulatory care sensitive conditions. *Eur J Public Health*. 2004;14(3):246-51.
6. Brown AD, Goldacre MJ, Hicks N, Rourke JT, McMurtry RY, Brown JD, et al. Hospitalization for ambulatory care-sensitive conditions: a method for comparative access and quality studies using routinely collected statistics. *Can J Public Health*. 2001;92(2):155-9.
7. Billings J, Teicholz N. Uninsured patients in District of Columbia hospitals. *Health Aff (Millwood)*. 1990;9(4):158-65.
8. Magan P, Otero A, Alberquilla A, Ribera JM. Geographic variations in avoidable hospitalizations in the elderly, in a health system with universal coverage. *BMC Health Serv Res*. 2008;8:42.
9. Tomkins S. *Affect Imagery Consciousness: The Positive Affects*. New York: Springer Publishing Inc; 1963.
10. Davidson KW, Mostofsky E, Whang W. Don't worry, be happy: positive affect and reduced 10-year incident coronary heart disease: The Canadian Nova Scotia Health Survey. *European Heart Journal*. 2010;31(9):1065-70.
11. Feller S, Teucher B, Kaaks R, Boeing H, Vigl M. Life Satisfaction and Risk of Chronic Diseases in the European Prospective Investigation into Cancer and Nutrition (EPIC)-Germany Study. *PLOS ONE*. 2013;8(8):e73462.
12. Grant N, Wardle J, Steptoe A. The relationship between life satisfaction and health behavior: a cross-cultural analysis of young adults. *Int J Behav Med*. 2009;16(3):259-68.
13. Goel V, Rosella LC, Fu L, Alberga A. The Relationship Between Life Satisfaction and Healthcare Utilization: A Longitudinal Study. *Am J Prev Med*. 2018;55(2):142-50.
14. Audulv Å, Ghahari S, Kephart G, Warner G, Packer TL. The Taxonomy of Everyday Self-management Strategies (TEDSS): A framework derived from the literature and refined using empirical data. *Patient Education and Counseling*. 2019;102(2):367-75.
15. Schulman-Green D, Jaser SS, Park C, Whittemore R. A metasynthesis of factors affecting self-management of chronic illness. *Journal of advanced nursing*. 2016;72(7):1469-89.
16. Liddy C, Blazkho V, Mill K. Challenges of self-management when living with multiple chronic conditions: systematic review of the qualitative literature. *Canadian family physician Medecin de famille canadien*. 2014;60(12):1123-33.
17. Konstam V, Salem D, Pouleur H, Kostis J, Gorkin L, Shumaker S, et al. Baseline Quality of Life as a Predictor of Mortality and Hospitalization in 5,025 Patients With Congestive Heart Failure. *The American Journal of Cardiology*. 1996;78(8):890-5.
18. González-Freire B, Vázquez-Rodríguez I, Marcos-Velázquez P, de la Cuesta CG. Repression and coping styles in asthmatic patients. *J Clin Psychol Med Settings*. 2010;17(3):220-9.
19. Scheier MF, Matthews KA, Owens JF, Schulz R, Bridges MW, Magovern GJ, et al. Optimism and rehospitalization after coronary artery bypass graft surgery. *Arch Intern Med*. 1999;159(8):829-35.
20. Ronaldson A, Molloy GJ, Wikman A, Poole L, Kaski JC, Steptoe A. Optimism and recovery after acute coronary syndrome: a clinical cohort study. *Psychosom Med*. 2015;77(3):311-8.

- 1  
2  
3  
4  
5  
6  
7  
8  
9  
10  
11  
12  
13  
14  
15  
16  
17  
18  
19  
20  
21  
22  
23  
24  
25  
26  
27  
28  
29  
30  
31  
32  
33  
34  
35  
36  
37  
38  
39  
40  
41  
42  
43  
44  
45  
46  
47  
48  
49  
50  
51  
52  
53  
54  
55  
56  
57  
58  
59  
60
21. Sanmartin CA, Khan S, Statistics Canada., Canadian Electronic Library (Firm). Hospitalizations for ambulatory care sensitive conditions (ACSC)  
the factors that matter. Ottawa, Ont.: Statistics Canada; 2011. Available from:  
[http://myaccess.library.utoronto.ca/login?url=http://books.scholarsportal.info/viewdoc.html?id=/ebooks/ebooks1/gibson\\_chrc/2011-10-10/1/10490988](http://myaccess.library.utoronto.ca/login?url=http://books.scholarsportal.info/viewdoc.html?id=/ebooks/ebooks1/gibson_chrc/2011-10-10/1/10490988) Available from:  
<http://publications.gc.ca/pub?id=389238&sl=0>.
  22. Canadian Community Health Survey- Annual Component (CCHS) 2016 [updated 2016-01-11. Available from: <http://www23.statcan.gc.ca/imdb/p2SV.pl?Function=getSurvey&Id=259374>.
  23. Canada S. Canadian Community Health Survey, 2003: User Guide for the Public Use of Microdata File. In: Canada S, editor. Ottawa 2005.
  24. Information CIfH. Indicator Library: Ambulatory Care Sensitive Conditions [Available from: <http://indicatorlibrary.cihi.ca/display/HSPIL/Ambulatory+Care+Sensitive+Conditions>.
  25. Weiner JP, Abrams C, Bodycombe D. The Johns Hopkins ACG case-mix system version 6.0 release notes. Baltimore: Johns Hopkins Bloomberg School of Public Health. 2003.
  26. Austin PC, van Walraven C, Wodchis WP, Newman A, Anderson GM. Using the Johns Hopkins Aggregated Diagnosis Groups (ADGs) to predict mortality in a general adult population cohort in Ontario, Canada. *Med Care*. 2011;49(10):932-9.
  27. Matheson FI, Dunn JR, Smith KL, Moineddin R, Glazier RH. Development of the Canadian Marginalization Index: a new tool for the study of inequality. *Can J Public Health*. 2012;103(8 Suppl 2):S12-6.
  28. Fine JP, Gray RJ. A Proportional Hazards Model for the Subdistribution of a Competing Risk. *Journal of the American Statistical Association*. 1999;94(446):496-509.
  29. Kolenikov S. Resampling variance estimation for complex survey data. *Stata Journal*. 2010;10(2):165-99.
  30. Lyubomirsky S, King L, Diener E. The benefits of frequent positive affect: does happiness lead to success? *Psychol Bull*. 2005;131(6):803-55.
  31. Pressman SD, Cohen S. Does positive affect influence health? *Psychol Bull*. 2005;131(6):925-71.
  32. Lathia N, Sandstrom GM, Mascolo C, Rentfrow PJ. Happier People Live More Active Lives: Using Smartphones to Link Happiness and Physical Activity. *PLoS One*. 2017;12(1):e0160589.
  33. Barger SD, Donoho CJ, Wayment HA. The relative contributions of race/ethnicity, socioeconomic status, health, and social relationships to life satisfaction in the United States. *Quality of Life Research*. 2009;18(2):179-89.
  34. Cuijpers P, de Graaf R, van Dorsselaer S. Minor depression: risk profiles, functional disability, health care use and risk of developing major depression. *Journal of Affective Disorders*. 2004;79(1):71-9.
  35. Black SA, Markides KS, Ray LA. Depression predicts increased incidence of adverse health outcomes in older Mexican Americans with type 2 diabetes. *Diabetes care*. 2003;26(10):2822-8.
  36. Bonikowska A, Helliwell J, Hou F, Schellenberg G. An Assessment of Life Satisfaction Responses on Recent Statistics Canada Surveys. *Social Indicators Research*. 2014;118(2):617-43.
  37. Baruth M, Lee DC, Sui X, Church TS, Marcus BH, Wilcox S, et al. Emotional outlook on life predicts increases in physical activity among initially inactive men. *Health Educ Behav*. 2011;38(2):150-8.
  38. Kim ES, Kubzansky LD, Soo J, Boehm JK. Maintaining Healthy Behavior: a Prospective Study of Psychological Well-Being and Physical Activity. *Ann Behav Med*. 2017;51(3):337-47.
  39. Sin NL, Moskowitz JT, Whooley MA. Positive Affect and Health Behaviors Across 5 Years in Patients With Coronary Heart Disease: The Heart and Soul Study. *Psychosom Med*. 2015;77(9):1058-66.
  40. Boehm Julia K, Chen Y, Koga H, Mathur Maya B, Vie Loryana L, Kubzansky Laura D. Is Optimism Associated With Healthier Cardiovascular-Related Behavior? *Circulation Research*. 2018;122(8):1119-34.

- 1  
2  
3 41. Kim ES, Strecher VJ, Ryff CD. Purpose in life and use of preventive health care services. Proc Natl  
4 Acad Sci U S A. 2014;111(46):16331-6.  
5 42. Vuik SI, Fontana G, Mayer E, Darzi A. Do hospitalisations for ambulatory care sensitive  
6 conditions reflect low access to primary care? An observational cohort study of primary care usage prior  
7 to hospitalisation. BMJ Open. 2017;7(8):e015704.  
8 43. Soo J, Kubzansky LD, Chen Y, Zevon ES, Boehm JK. Psychological well-being and restorative  
9 biological processes: HDL-C in older English adults. Soc Sci Med. 2018;209:59-66.  
10  
11  
12  
13  
14  
15  
16  
17  
18  
19  
20  
21  
22  
23  
24  
25  
26  
27  
28  
29  
30  
31  
32  
33  
34  
35  
36  
37  
38  
39  
40  
41  
42  
43  
44  
45  
46  
47  
48  
49  
50  
51  
52  
53  
54  
55  
56  
57  
58  
59  
60

For peer review only

## Supplement Table 1:

ICD-10-CA/ CCI codes for ACSC hospitalizations<sup>1</sup>

| Condition                                                                                                                                                                                                                                                                                                                                                                                                                                                                                                                                                                                                                                                                                                                                                                                                                                                                                                                                                                                                                              | ICD-10-CA Code(s)                                                                                                                                                    |
|----------------------------------------------------------------------------------------------------------------------------------------------------------------------------------------------------------------------------------------------------------------------------------------------------------------------------------------------------------------------------------------------------------------------------------------------------------------------------------------------------------------------------------------------------------------------------------------------------------------------------------------------------------------------------------------------------------------------------------------------------------------------------------------------------------------------------------------------------------------------------------------------------------------------------------------------------------------------------------------------------------------------------------------|----------------------------------------------------------------------------------------------------------------------------------------------------------------------|
| Grand mal status and other epileptic convulsions                                                                                                                                                                                                                                                                                                                                                                                                                                                                                                                                                                                                                                                                                                                                                                                                                                                                                                                                                                                       | G40, G41                                                                                                                                                             |
| Chronic obstructive pulmonary disease (COPD)                                                                                                                                                                                                                                                                                                                                                                                                                                                                                                                                                                                                                                                                                                                                                                                                                                                                                                                                                                                           | J41, J42, J43, J44, J47<br><br>(only when a secondary diagnosis of J44 is also present) J10.0, J11.0, J12–J16, J18, J20, J21, J22                                    |
| Asthma                                                                                                                                                                                                                                                                                                                                                                                                                                                                                                                                                                                                                                                                                                                                                                                                                                                                                                                                                                                                                                 | J45                                                                                                                                                                  |
| Diabetes                                                                                                                                                                                                                                                                                                                                                                                                                                                                                                                                                                                                                                                                                                                                                                                                                                                                                                                                                                                                                               | E10.0, E10.1, E10.63, E10.64, E10.9<br><br>E11.0, E11.1, E11.63, E11.64, E11.9<br><br>E13.0, E13.1, E13.63, E13.64, E13.9<br><br>E14.0, E14.1, E14.63, E14.64, E14.9 |
| Hypertension*                                                                                                                                                                                                                                                                                                                                                                                                                                                                                                                                                                                                                                                                                                                                                                                                                                                                                                                                                                                                                          | I10.0, I10.1, I11                                                                                                                                                    |
| Heart Failure and pulmonary edema                                                                                                                                                                                                                                                                                                                                                                                                                                                                                                                                                                                                                                                                                                                                                                                                                                                                                                                                                                                                      | I50, J81                                                                                                                                                             |
| Angina*                                                                                                                                                                                                                                                                                                                                                                                                                                                                                                                                                                                                                                                                                                                                                                                                                                                                                                                                                                                                                                | I20, I23.82, I24.0, I24.8, I24.9                                                                                                                                     |
| <p>*Excluding cases with cardiac procedures, CCI codes for exclusion:</p> <p>1.HA.58.^, 1.HA.80.^, 1.HA.87.^, 1.HB.53.^, 1.HB.54.^, 1.HB.55.^, 1.HB.87.^, 1.HD.53.^, 1.HD.54.^, 1.HD.55.^, 1.HH.59.^, 1.HH.71.^, 1.HJ.76.^, 1.HJ.82.^, 1.HM.57.^, 1.HM.78.^, 1.HM.80.^, 1.HN.71.^, 1.HN.80.^, 1.HN.87.^, 1.HP.76.^, 1.HP.78.^, 1.HP.80.^, 1.HP.82.^, 1.HP.83.^, 1.HP.87.^, 1.HR.71.^, 1.HR.80.^, 1.HR.84.^, 1.HR.87.^, 1.HS.80.^, 1.HS.90.^, 1.HT.80.^, 1.HT.89.^, 1.HT.90.^, 1.HU.80.^, 1.HU.90.^, 1.HV.80.^, 1.HV.90.^, 1.HW.78.^, 1.HW.79.^, 1.HX.71.^, 1.HX.78.^, 1.HX.79.^, 1.HX.80.^, 1.HX.83.^, 1.HX.86.^, 1.HX.87.^, 1.HY.85.^, 1.HZ.53 rubric (except 1.HZ.53.LA-KP), 1.HZ.54.^, 1.HZ.55 rubric (except 1.HZ.55.LA-KP), 1.HZ.56.^, 1.HZ.57.^, 1.HZ.59.^, 1.HZ.80.^, 1.HZ.85.^, 1.HZ.87.^, 1.IF.83.^, 1.IJ.50.^, 1.IJ.54.GQ-AZ, 1.IJ.55.^, 1.IJ.57.^, 1.IJ.76.^, 1.IJ.80.^, 1.IJ.86.^, 1.IK.50.^, 1.IK.57.^, 1.IK.80.^, 1.IK.87.^, 1.IN.84.^, 1.LA.84.^, 1.LC.84.^, 1.LD.84.^, 1.YY.54.LA-NJ, 1.YY.54.LA-FS, 1.YY.54.LA-NM</p> |                                                                                                                                                                      |

<sup>1</sup> More information on CIHI methodology: <http://indicatorlibrary.cihi.ca/display/HSPIL/Ambulatory+Care+Sensitive+Conditions>  
For peer review only - <http://bmjopen.bmj.com/site/about/guidelines.xhtml>



Supplement Table 2: Multivariable AHRs <sup>a</sup> and 95% CIs Across Sensitivity Analyses

|                                                                                                                                                                                                                                                                                                                                                                | Five-year survival <sup>b</sup> (N= 129,467) |            | Excluding events from first two years <sup>c</sup> (N= 128,638) |            |
|----------------------------------------------------------------------------------------------------------------------------------------------------------------------------------------------------------------------------------------------------------------------------------------------------------------------------------------------------------------|----------------------------------------------|------------|-----------------------------------------------------------------|------------|
|                                                                                                                                                                                                                                                                                                                                                                | HR (95% CI)                                  | p-value    | HR (95% CI)                                                     | p-value    |
| <b>Life Satisfaction</b>                                                                                                                                                                                                                                                                                                                                       |                                              |            |                                                                 |            |
| Very Satisfied                                                                                                                                                                                                                                                                                                                                                 | (ref)                                        | (ref)      | (ref)                                                           | (ref)      |
| Satisfied                                                                                                                                                                                                                                                                                                                                                      | 1.32 (1.16 – 1.51)                           | P < 0.0001 | 1.38 (1.17 – 1.62)                                              | P < 0.0001 |
| Neither Satisfied or Dissatisfied                                                                                                                                                                                                                                                                                                                              | 1.71 (1.36 – 2.14)                           | P < 0.0001 | 1.74 (1.33 – 2.28)                                              | P < 0.0001 |
| Dissatisfied and Very Dissatisfied                                                                                                                                                                                                                                                                                                                             | 2.74 (1.89 – 3.98)                           | P < 0.0001 | 2.77 (1.69 – 4.55)                                              | P < 0.0001 |
| <sup>a</sup> All models were fully adjusted models which controlled for age, sex, physical activity, BMI, alcohol consumption, smoking status.<br><sup>b</sup> Five-year survival models were run with a consistent survival time of five years.<br><sup>c</sup> Models were run without individuals who had an event within the first two years of follow-up. |                                              |            |                                                                 |            |

Supplement Table 3: Unadjusted HRs from The Subdistribution Hazard Model <sup>a</sup>

|                                                                                 | HR (95% CI)        | p-value    |
|---------------------------------------------------------------------------------|--------------------|------------|
| <b>Life Satisfaction</b>                                                        |                    |            |
| Very Satisfied                                                                  | (ref)              | (ref)      |
| Satisfied                                                                       | 1.44 (1.30 - 1.60) | P < 0.0001 |
| Neither Satisfied or Dissatisfied                                               | 2.20 (1.86 - 2.60) | P < 0.0001 |
| Dissatisfied and Very Dissatisfied                                              | 4.38 (3.73 - 5.14) | P < 0.0001 |
| <sup>a</sup> Subdistribution hazard model considered death as a competing risk. |                    |            |

Supplement Table 4: Multivariable AHRs<sup>a</sup> and 95% CIs Across Different Measures of Socioeconomic Status

|                                                                                                                                                   | On-Marg Deprivation Quintile |            | Household Income Quintile |            | Education Level    |            |
|---------------------------------------------------------------------------------------------------------------------------------------------------|------------------------------|------------|---------------------------|------------|--------------------|------------|
|                                                                                                                                                   | HR (95% CI)                  | p-value    | HR (95% CI)               | p-value    | HR (95% CI)        | p-value    |
| <i>Life Satisfaction</i>                                                                                                                          |                              |            |                           |            |                    |            |
| Very Satisfied                                                                                                                                    | (ref)                        | (ref)      | (ref)                     | (ref)      | (ref)              | (ref)      |
| Satisfied                                                                                                                                         | 1.33 (1.17 - 1.52)           | P < 0.0001 | 1.32 (1.15 - 1.50)        | P < 0.0001 | 1.32 (1.15 - 1.51) | P < 0.0001 |
| Neither Satisfied or<br>Dissatisfied                                                                                                              | 1.75 (1.40 - 2.19)           | P < 0.0001 | 1.71 (1.36 - 2.14)        | P < 0.0001 | 1.75 (1.40 - 2.19) | P < 0.0001 |
| Dissatisfied and Very<br>Dissatisfied                                                                                                             | 2.89 (2.01 - 4.15)           | P < 0.0001 | 2.71 (1.87 - 3.93)        | P < 0.0001 | 2.86 (2.00 - 4.08) | P < 0.0001 |
| HR – hazard ratio, CI – confidence interval                                                                                                       |                              |            |                           |            |                    |            |
| <sup>a</sup> Models are adjusted for age, sex, physical activity, BMI, alcohol consumption, smoking status in addition to the variable specified. |                              |            |                           |            |                    |            |

Table 1: Multivariable AHRs <sup>a</sup> and 95% CIs Across Different Measures of Socioeconomic Status (N= 129,467)

|                                                                                                                                                   | On-Marg Deprivation Quintile |            | Household Income Quintile |            | Education Level    |            |
|---------------------------------------------------------------------------------------------------------------------------------------------------|------------------------------|------------|---------------------------|------------|--------------------|------------|
|                                                                                                                                                   | HR (95% CI)                  | p-value    | HR (95% CI)               | p-value    | HR (95% CI)        | p-value    |
| <i>Life Satisfaction</i>                                                                                                                          |                              |            |                           |            |                    |            |
| Very Satisfied                                                                                                                                    | (ref)                        | (ref)      | (ref)                     | (ref)      | (ref)              | (ref)      |
| Satisfied                                                                                                                                         | 1.33 (1.17 - 1.52)           | P < 0.0001 | 1.32 (1.15 - 1.50)        | P < 0.0001 | 1.32 (1.15 - 1.51) | P < 0.0001 |
| Neither Satisfied or Dissatisfied                                                                                                                 | 1.75 (1.40 - 2.19)           | P < 0.0001 | 1.71 (1.36 - 2.14)        | P < 0.0001 | 1.75 (1.40 - 2.19) | P < 0.0001 |
| Dissatisfied and Very Dissatisfied                                                                                                                | 2.89 (2.01 - 4.15)           | P < 0.0001 | 2.71 (1.87 - 3.93)        | P < 0.0001 | 2.86 (2.00 - 4.08) | P < 0.0001 |
| HR – hazard ratio, CI – confidence interval                                                                                                       |                              |            |                           |            |                    |            |
| <sup>a</sup> Models are adjusted for age, sex, physical activity, BMI, alcohol consumption, smoking status in addition to the variable specified. |                              |            |                           |            |                    |            |

1  
2  
3  
4  
5  
6  
7  
8  
9  
10  
11  
12  
13  
14  
15  
16  
17  
18  
19  
20  
21  
22  
23  
24  
25  
26  
27  
28  
29  
30  
31  
32  
33  
34  
35  
36  
37  
38  
39  
40  
41  
42  
43  
44  
45  
46  
47  
48  
49  
50  
51  
52  
53  
54  
55  
56  
57  
58  
59  
60

For peer review only

1  
2  
3  
4  
5  
6  
7  
8  
9  
10  
11  
12  
13  
14  
15  
16  
17  
18  
19  
20  
21  
22  
23  
24  
25  
26  
27  
28  
29  
30  
31  
32  
33  
34  
35  
36  
37  
38  
39  
40  
41  
42  
43  
44  
45  
46  
47  
48  
49  
50  
51  
52  
53  
54  
55  
56  
57  
58  
59  
60

For peer review only

1  
2  
3  
4  
5  
6  
7  
8  
9  
10  
11  
12  
13  
14  
15  
16  
17  
18  
19  
20  
21  
22  
23  
24  
25  
26  
27  
28  
29  
30  
31  
32  
33  
34  
35  
36  
37  
38  
39  
40  
41  
42  
43  
44  
45  
46  
47  
48  
49  
50  
51  
52  
53  
54  
55  
56  
57  
58  
59  
60

For peer review only

1  
2  
3  
4  
5  
6  
7  
8  
9  
10  
11  
12  
13  
14  
15  
16  
17  
18  
19  
20  
21  
22  
23  
24  
25  
26  
27  
28  
29  
30  
31  
32  
33  
34  
35  
36  
37  
38  
39  
40  
41  
42  
43  
44  
45  
46  
47  
48  
49  
50  
51  
52  
53  
54  
55  
56  
57  
58  
59  
60

For peer review only

STROBE Checklist – Location of Specific Items for “The relationship between life satisfaction and preventable hospitalizations: a longitudinal population-based cohort study”

|                           | Item No | Page Number                                                                                                      |
|---------------------------|---------|------------------------------------------------------------------------------------------------------------------|
| <b>Title and abstract</b> | 1       | (a) Cover page (title page)<br>(b) Abstract: 1                                                                   |
| <b>Introduction</b>       |         |                                                                                                                  |
| Background/rationale      | 2       | 2                                                                                                                |
| Objectives                | 3       | 2 to 3                                                                                                           |
| <b>Methods</b>            |         |                                                                                                                  |
| Study design              | 4       | 3                                                                                                                |
| Setting                   | 5       | 3                                                                                                                |
| Participants              | 6       | 3                                                                                                                |
| Variables                 | 7       | 3 to 4                                                                                                           |
| Data sources/ measurement | 8       | 3 to 5                                                                                                           |
| Bias                      | 9       | 5                                                                                                                |
| Study size                | 10      | 3                                                                                                                |
| Quantitative variables    | 11      | 3 to 4                                                                                                           |
| Statistical methods       | 12      | (a) Describe all statistical methods: 3 to 5<br>(b) Subgroups and interactions: 5<br>(c) Sensitivity Analyses: 5 |
| <b>Results</b>            |         |                                                                                                                  |
| Participants              | 13      | 5 to 6                                                                                                           |
| Descriptive data          | 14      | 6 and Table 1 to 2                                                                                               |
| Outcome data              | 15      | 5                                                                                                                |
| Main results              | 16      | 6 to 7 and Tables 3 to 6                                                                                         |
| Other analyses            | 17      | 7 and Tables 7 to 8                                                                                              |
| <b>Discussion</b>         |         |                                                                                                                  |
| Key results               | 18      | 3 to 8                                                                                                           |
| Limitations               | 19      | 8                                                                                                                |
| Interpretation            | 20      | 7 to 9                                                                                                           |
| Generalisability          | 21      | 9                                                                                                                |
| <b>Other information</b>  |         |                                                                                                                  |
| Funding                   | 22      | 10                                                                                                               |

Commented [EDP1]: Update with correct funding statement!



# BMJ Open

## The relationship between life satisfaction and preventable hospitalizations: a population-based cohort study in Ontario, Canada

|                                 |                                                                                                                                                                                                                                                                                                                                                                                   |
|---------------------------------|-----------------------------------------------------------------------------------------------------------------------------------------------------------------------------------------------------------------------------------------------------------------------------------------------------------------------------------------------------------------------------------|
| Journal:                        | <i>BMJ Open</i>                                                                                                                                                                                                                                                                                                                                                                   |
| Manuscript ID                   | bmjopen-2019-032837.R1                                                                                                                                                                                                                                                                                                                                                            |
| Article Type:                   | Original research                                                                                                                                                                                                                                                                                                                                                                 |
| Date Submitted by the Author:   | 04-Jan-2020                                                                                                                                                                                                                                                                                                                                                                       |
| Complete List of Authors:       | De Prophetis, Eric; University of Toronto, Dalla Lana School of Public Health<br>Goel, Vivek; University of Toronto, Dalla Lana School of Public Health; University of Toronto, Institute of Health Policy, Management and Evaluation<br>Watson, Tristan; Institute for Clinical Evaluative Sciences<br>Rosella, Laura; University of Toronto, Dalla Lana School of Public Health |
| <b>Primary Subject Heading</b>: | Epidemiology                                                                                                                                                                                                                                                                                                                                                                      |
| Secondary Subject Heading:      | Health services research, Health policy                                                                                                                                                                                                                                                                                                                                           |
| Keywords:                       | Life Satisfaction, Avoidable hospitalization, EPIDEMIOLOGY                                                                                                                                                                                                                                                                                                                        |
|                                 |                                                                                                                                                                                                                                                                                                                                                                                   |

SCHOLARONE™  
Manuscripts

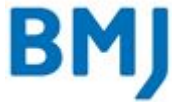

I, the Submitting Author has the right to grant and does grant on behalf of all authors of the Work (as defined in the below author licence), an exclusive licence and/or a non-exclusive licence for contributions from authors who are: i) UK Crown employees; ii) where BMJ has agreed a CC-BY licence shall apply, and/or iii) in accordance with the terms applicable for US Federal Government officers or employees acting as part of their official duties; on a worldwide, perpetual, irrevocable, royalty-free basis to BMJ Publishing Group Ltd ("BMJ") its licensees and where the relevant Journal is co-owned by BMJ to the co-owners of the Journal, to publish the Work in this journal and any other BMJ products and to exploit all rights, as set out in our [licence](#).

The Submitting Author accepts and understands that any supply made under these terms is made by BMJ to the Submitting Author unless you are acting as an employee on behalf of your employer or a postgraduate student of an affiliated institution which is paying any applicable article publishing charge ("APC") for Open Access articles. Where the Submitting Author wishes to make the Work available on an Open Access basis (and intends to pay the relevant APC), the terms of reuse of such Open Access shall be governed by a Creative Commons licence – details of these licences and which [Creative Commons](#) licence will apply to this Work are set out in our licence referred to above.

Other than as permitted in any relevant BMJ Author's Self Archiving Policies, I confirm this Work has not been accepted for publication elsewhere, is not being considered for publication elsewhere and does not duplicate material already published. I confirm all authors consent to publication of this Work and authorise the granting of this licence.

1  
2  
3  
4 The relationship between life satisfaction and preventable hospitalizations: a population-  
5 based cohort study in Ontario, Canada  
6  
7

8  
9 Eric De Prophetis<sup>a</sup>, MSc; Vivek Goel<sup>a,b</sup>, MD MSc; Tristan Watson<sup>b</sup>, MPH; Laura  
10 Rosella<sup>a,b,c</sup>, PhD, MHSc;  
11  
12

13  
14  
15 a Dalla Lana School of Public Health, University of Toronto, Toronto, ON, Canada

16 b ICES, Toronto, ON, Canada

17 c Public Health Ontario, Toronto, ON, Canada  
18  
19

20  
21 WORD COUNT: 3,390  
22

23 ADDRESS CORRESPONDANCE AND REPRINT REQUESTS TO:  
24

25 Professor Laura Rosella  
26 University of Toronto  
27 155 College St  
28 Health Sciences Bldg, 6th floor  
29 Toronto, ON, M5T 3M7  
30 laura.rosella@utoronto.ca  
31  
32  
33  
34  
35  
36  
37  
38  
39  
40  
41  
42  
43  
44  
45  
46  
47  
48  
49  
50  
51  
52  
53  
54  
55  
56  
57  
58  
59  
60

## Abstract

**Objective:** To examine if low life satisfaction is associated with an increased risk of being hospitalized for an ambulatory care sensitive condition (ACSC), in comparison to high life satisfaction

**Design and setting:** Population-based cohort study of adults from Ontario, Canada. Baseline data was captured through the Canadian Community Health Survey (CCHS) and linked to health administrative data for follow-up information.

**Participants:** 129,467 men and women between the ages of 18 to 74.

**Main outcome measures:** Time to avoidable hospitalizations defined by ACSCs.

**Results:** Life satisfaction was measured at baseline through the CCHS and follow-up information on ACSC hospitalizations were captured by linking participant respondents to hospitalization records covered under a single payer health system. Within the study timeframe (maximum of 14 years), 3037 individuals were hospitalized. Older men in the lowest household income quintile were more likely to be hospitalized with an ACSC. After controlling for age, sex, socioeconomic (SES), and other behavioural factors, low life satisfaction at baseline had a strong relationship with future hospitalizations for ACSCs (hazard ratio 2.71; 95% CI, 1.87-3.93). The hazards were highest for those who jointly had the lowest levels of life satisfaction and low household income (hazard ratio 3.80; 95% CI, 2.13-6.73). Results did not meaningful change after running a competing risk survival analysis.

**Conclusions:** This study demonstrates that poor life satisfaction is associated with hospitalizations for ACSCs after adjustment for several confounders. Furthermore, the magnitude of this relationship was greater for those who were more socioeconomically disadvantaged. This study adds to the existing literature on the impact of life satisfaction on health system outcomes by documenting its impact on avoidable hospitalizations in a universal health system.

## Strengths and Limitations

- This is the largest study to combine detailed survey variables linked to complete hospitalization outcomes from health administrative databases to study the impact of life satisfaction on ambulatory care sensitive conditions (ACSCs).
- The linkage of various databases allowed for control of a wide range of confounders in addition to objective measures of comorbidity.
- The linkage and study design allowed measurement of baseline life satisfaction on a sample of individuals who did not have an ACSCs in the two years prior, which overcomes a limitation of previous studies that may have been influenced by the bidirectional relationship between poor health and life satisfaction.
- Life satisfaction was measured at one point in time and thus we were unable to capture changes in life satisfaction over the study period.
- This study did not directly address mechanisms by which life satisfaction could influence ACSCs.

## Transparency Statement

The lead author affirms that the manuscript is an honest, accurate, and transparent account of the study being reported; that no important aspects of the study have been omitted; and that any discrepancies from the study as planned (and, if relevant, registered) have been explained.

## What is already known about the topic

Poor life satisfaction has been associated with an increased risk of death, chronic disease and future high healthcare use. In this context, few studies have addressed hospitalizations for ambulatory care sensitive conditions (ACSC) as an outcome and those that do have often done so with diseased baseline cohorts.

## What this study adds

In the present study, poor life satisfaction was associated with an increased risk of future hospitalizations for an ACSC. These effects remained significant even after controlling for socioeconomic status, behaviour risk factors, multi-morbidity and mood disease. These effects were also shown to be stronger for those who were more socioeconomically disadvantaged.

## Introduction

There has been broad recognition that upstream determinants have an influence on a range of health outcomes, including social determinants and risky health behaviours. In addition, subjective well-being, specifically life satisfaction is increasingly being recognized as playing an important role.(1-3) Shifting from health outcomes to a health system perspective, many ambulatory care sensitive conditions (ACSC) are preventable and result in high amounts of healthcare resources if left unmanaged.(4, 5) Hospitalizations for these conditions (e.g., diabetes) are regarded as avoidable due to the relationship of timely access to primary care preventing complications and acute episodes.(5-7) In many countries, hospitalizations for these conditions are used as an indicator to measure the effectiveness of the healthcare system. (8)

Positive affect (i.e. positive emotions, happiness), is the degree to which an individual experiences positive emotion (9), has been shown to be independently associated with reduced risk of coronary heart disease, even after adjustment for depressive symptoms. (10) Similarly, life satisfaction is associated with a reduced risk of various chronic conditions. (2, 11) Evidence from a recent prospective cohort study concluded lower life satisfaction was associated with a higher incidence of cancer, stroke, and type-2 diabetes (11) and others have shown its relationship with health behaviours. (12) Positive affect is distinct from life satisfaction in that it is an emotional response describing positive emotions or happiness, which can be transitory. This is conceptually distinct from the more stable and complex measure of being satisfied with life, which is based on an individual's self-judgments of several factors that they feel are valuable to their life.

Research on life satisfaction has also recently shown to impact future high-health care use.(13) Individuals with lower life satisfaction had three times the odds of being in the top 5% of healthcare resource utilization.(13) However, another important system indicator that is absent from the current life satisfaction literature is avoidable hospitalizations, such as those caused by ACSCs. Given the evidence around the interrelationships between emotional factors and chronic-disease self-management (14) and in particular how emotional and psychological distress can influence the ability of a patient to manage their chronic condition (15, 16), more research is needed that quantitatively measures the impact of subjective well-being on important healthcare system outcomes.

Upon a recent search, only eight studies were identified that fit the criteria of a similar exposure to life satisfaction and hospitalizations for one or more ACSCs as an outcome. Previous studies mostly focused on singular conditions, with small sample sizes, limited follow-up time and clinical or convenience-based samples (17, 18). Regarding the length of follow-up, these ranged from six months (19) to four years (20). Studies with shorter follow-up times can be limited because many of the conditions regarded as ACSCs are also chronic diseases (e.g., diabetes) require a longer follow-up time necessary to allow for outcomes to be observed. Furthermore, hospitalizations for ACSCs are a relatively rare event in Canada where people with an ACSC hospitalization constitutes only 0.4% of the population aged 12 to 74 (21), and therefore, the

1  
2  
3 limited sample sizes in previous studies may not be sufficient to observe an effect. We address  
4 these limitations by conducting the largest population-based cohort study to date. The low rate  
5 of ACSCs is typical of similar health systems in Europe, the UK and Australia.  
6  
7

8 The primary objective of this study was to determine if poor life satisfaction increased the risk of  
9 being hospitalized for an ACSC in a relatively healthy baseline cohort among an adult population  
10 using linked survey and complete hospitalization records. Our secondary objective was to  
11 determine if this association was stronger among those with lower socioeconomic status.  
12  
13

## 14 Methods

### 15 Participants

16 The study was a longitudinal population-based cohort study of adult Ontario participants of the  
17 Canadian Community Health Survey (CCHS) pooled across five cycles: Cycle 2.1 (2003-2004),  
18 Cycle 3.1 (2005-2006), Cycle (2007-2008), Cycle (2009-2010), and Cycle (2011-2012). The  
19 CCHS conducted surveys on a 2-year collection cycle (i.e., 2003, 2005) therefore no cycle  
20 existed for 2004 and 2006 and cycle naming conventions changed after 2005 to remove cycle  
21 numbers. The CCHS is a cross-sectional survey administered by Statistics Canada, representative  
22 of 98% of the Canadian population aged  $\geq 12$  years living in private dwellings with response  
23 rates  $>75\%$ . (22,23) The respondents in the CCHS survey consented to participate in the survey  
24 and have their data linked to administrative data for research purposes. Where the CCHS is a  
25 cross-sectional survey, the longitudinal aspect of this study is achieved by retrieving the outcome  
26 measure from hospital administrative databases. The data was linked to population-based health  
27 administrative data held at ICES. These data sources capture all hospitalization records for every  
28 person living in the province of Ontario covered under the single-payer health system.  
29  
30  
31  
32  
33  
34

35 Eighty percent of the CCHS survey respondents consented to have their data linked to the single-  
36 payer health insurance data, referred to as the Ontario Health Insurance Plan (OHIP), which  
37 captures all related healthcare encounters. All survey respondents were linked to Ontario's  
38 population registry, the Registered Persons Database (RPDB), which captures core demographic  
39 and clinical information as well as death, in addition to the Discharge Abstract Database (DAD).  
40 The analytic sample included adults (aged 18 to 74) who reported on life satisfaction and did not  
41 have an ACSC-related hospitalization in the two years before their CCHS interview date (**Figure**  
42 **1**).  
43  
44  
45

### 46 Measures

47 Self-reported life satisfaction, the primary exposure variable, is captured from CCHS. The  
48 question that respondents answered regarding life satisfaction was, "How satisfied are you with  
49 your life in general?" With response options being: *very satisfied*, *satisfied*, *neither satisfied nor*  
50 *dissatisfied*, *dissatisfied*, or *very dissatisfied*. Due to small sample sizes within each category, we  
51 collapsed the categories of dissatisfied and very dissatisfied. Furthermore, we did not  
52 hypothesize significant conceptual differences between these two categories related to  
53 hospitalizations for ACSCs.  
54  
55  
56  
57  
58  
59

1  
2  
3 The primary outcome variable was hospitalizations for an ACSC, which we used as a composite  
4 outcome. The ACSCs that we chose to report on are grand mal status and other epileptic  
5 convulsions, chronic obstructive pulmonary disease, asthma, diabetes, heart failure and  
6 pulmonary edema, hypertension, and angina. These conditions are in accordance with the  
7 Canadian Institute for Health Information's (CIHI) methodology (24) and this composite  
8 outcome is an established health system indicator in Canada. The CIHI indicator applies only to  
9 individuals under the age of 75 as the hospitalizations in those above the age of 75 are not as  
10 clearly avoidable through timely and effective primary care. See **Supplement Table 1** for the list  
11 of included conditions and their corresponding ICD-10 codes.  
12  
13  
14  
15

16 Aggregate diagnosis groups (ADGs<sup>®</sup>)(25) were captured through administrative data as a  
17 summary measure of comorbidity and are based on the Johns Hopkins ACG<sup>®</sup> System, which is a  
18 person-focused, diagnosis-based method of categorizing subjects' illnesses [22]. ADGs have  
19 previously been used and validated as a reliable method of comorbidity adjustment in the Ontario  
20 population (26), and we used Version 10.0.1 in this analysis. Additionally, we used the Ontario  
21 Marginalization Index (ON-Marg) as a measure of socioeconomic status. The ON-Marg is a  
22 census-based, geographically derived index that was used to calculate area-level material  
23 deprivation.(27) Specifically, the material deprivation dimension measures the proportion of the  
24 population within a geographic region that is low income, without high school diploma, lone  
25 parent families, receiving government transfer payments, unemployed, and living in dwellings in  
26 need of repair. All other covariates were captured through self-report from the CCHS interview  
27 questions.  
28  
29  
30  
31  
32

### 33 CCHS Variables

34 Household income quintile categorizes individuals based on their total household income in  
35 addition to the number of individuals living in the household. Individuals are then ranked from  
36 the lowest levels of household income (*Q1*) to the highest (*Q5*). Body Mass Index (BMI) was  
37 categorized into five categories ranging from "underweight" (BMI less than 18.5) to "severely  
38 obese" (BMI greater than 34.9). Physical activity was based on an individual's self-reported  
39 daily energy expenditure and further categorized into three levels: active, moderately active and  
40 inactive. Smoking status measured an individuals' self-reported past and present smoking habits  
41 by considering both the total amount of cigarettes smoked and the type of smoker they are (e.g.,  
42 daily vs. occasional). This variable was categorized into three levels: current smoker, former  
43 smoker, never smoker. Alcohol consumption was based on the participant's sex and the quantity  
44 of alcohol consumed each day. This variable was then categorized into four levels: heavy  
45 drinker, moderate drinker, light drinker and never drinker. Mood disease was captured through  
46 the CCHS interview question "have you ever been diagnosed by a health professional for  
47 depression, bipolar disorder, mania or dysthymia?" This variable was used to control for  
48 depression. Anxiety disorder, which was captured through the question: "have you ever been  
49 diagnosed by a health professional for an anxiety disorder such as a phobia, obsessive-  
50 compulsive disorder, or panic disorder?" Education level is a derived variable which indicates  
51  
52  
53  
54  
55  
56  
57  
58  
59  
60



1  
2  
3 the highest level of education acquired by the participant; this variable was explored as a  
4 potential indicator for SES.  
5

### 6 7 **Statistical Analysis**

8 We calculated the distribution of demographic, socioeconomic, health status and behaviour  
9 characteristics according to ACSCs and life satisfaction. Excluding those with an ACSC in the  
10 year prior allowed for the investigation of the upstream determinants (i.e. the factors associated  
11 with future development of an ACSC hospitalization in a cohort who were without a recent  
12 hospitalization for one of these conditions).  
13  
14

15 Cox proportional hazards models were used to estimate the hazards associated with baseline life  
16 satisfaction on the risk of being hospitalized for an ACSC. Time is defined as survey date until  
17 disease or censoring for study endpoint (max follow up until March 31, 2017) or death. The  
18 models were used to quantify the association between life satisfaction and the hazard of being  
19 hospitalized for an ACSC using “very satisfied” as the referent category. We calculated  
20 unadjusted, age-sex-adjusted, minimally adjusted and fully adjusted models to transparently  
21 demonstrate the impact of adjustment. The minimally adjusted model controlled for age, sex and  
22 household income while the fully adjusted model included age, sex, household income, smoking  
23 status, alcohol consumption, physical activity and BMI. In order to show the fully adjusted  
24 results were not meaningfully affected by over comorbidity, mood disorders and anxiety, we ran  
25 three additional models, which controlled for ADG score, mood disease, and anxiety separately.  
26 We ran these models separately in order to quantify their impact on the life satisfaction hazards  
27 in the fully adjusted model that controlled for sociodemographic and behavioural factors that we  
28 conceptualized as confounders (i.e. age, sex, household income, smoking status, alcohol  
29 consumption, physical activity and BMI).  
30  
31  
32  
33  
34  
35

36 To evaluate the proportional hazards assumption for life satisfaction, a plot of log(-log  
37 (survival)) versus the logarithm of follow-up time in days was run. With this method, the  
38 proportional hazards assumption is met if the plot produces parallel curves.  
39  
40

41 A joint-effects model was used to test if the relationship between life satisfaction and avoidable  
42 hospitalizations varied by SES. A joint-effects variable, which contains each combination of life  
43 satisfaction and household income, was included in the model while controlling for age, sex,  
44 smoking status, alcohol consumption, physical activity and BMI.  
45  
46

47 We ran sensitivity analyses by re-running the fully adjusted model with a consistent survival  
48 time of five years. Additionally, models for individuals who did not have an event in the first two  
49 years of the study were run to control for undocumented comorbidity. The subdistribution  
50 hazards model, which was initially developed by Fine and Gray (28), was run to test the  
51 possibility of death behaving as a competing risk.  
52  
53  
54  
55  
56  
57  
58  
59  
60

1  
2  
3 Survey and bootstrap sampling weights provided by Statistics Canada were applied in all  
4 descriptive and survival regression analyses to account for the complex survey design and to  
5 maintain population representativeness. (29) The bootstrap sampling weights were applied using  
6 balanced repeated replication, in order to properly calculate confidence intervals. Additionally,  
7 this project received ethics approval from the Health Sciences Research Ethics Board at the  
8 University of Toronto (Ref # 36123, 15 August 2018). Finally, all statistical analyses were  
9 performed in 2018 and 2019 using SAS version 9.4.  
10  
11  
12

### 13 Patient Involvement

14 Patients were not involved in the development of the research question, outcome measures,  
15 recruitment, design or the implementation of the study objectives. Furthermore, no patients were  
16 consulted on the interpretation of results, and there are no plans to disseminate the results of this  
17 study to the relevant participants or their communities.  
18  
19  
20

### 21 Results

22 After combining the five cycles of data linked to the Registered Persons Database and excluding  
23 those less than 18, older than 74, in multiple survey cycles, missing life satisfaction, had an  
24 ACSC related hospitalization in the two years before the start of the study resulted in 129,467  
25 individuals remaining. Those who experienced an ACSC-related hospitalization two years before  
26 their survey interview date were removed to examine the impact of life satisfaction on future  
27 hospitalizations for an ACSC and reduce the possibility of reverse causality (**Figure 1**). In the  
28 case of people in multiple survey cycles (n=1,589), we used the earliest survey response. Each  
29 respondent was followed for a maximum of 14 years or until the study end date, after which we  
30 determined that 3,037 individuals had experienced an ACSC-related hospitalization.  
31  
32  
33  
34

35 The distribution of baseline characteristics according to life satisfaction categories are shown in  
36 Table 1. Those with the lowest levels of life satisfaction (very dissatisfied) compared to the  
37 highest level of life satisfaction (very satisfied) had a lower proportion in the youngest (18-34  
38 years) age group (14.5% versus 30.6%), more likely to have less than secondary education  
39 (12.9% versus 4.62%), had a greater proportion in the lowest income quintile (38.9% versus  
40 9.5%), higher comorbidity levels (ADG score 10.1 versus 3.42), and higher disease-related risk  
41 factors such as smoking (43.8% versus 17.4%) and physical inactivity (70.6% versus 40.7%).  
42  
43  
44  
45 (**Table 1**).

46 The distribution of all the cohort characteristics according to ACSC status are show in Table 2.  
47 Those that had an ACSC during the follow-up compared to those that did not were more likely to  
48 be in the older age group (65-74 years) (21.6% versus 9.55%), more likely to have less than  
49 secondary education (19.2% versus 6.01%), had a greater proportion in the lowest income  
50 quintile (20.7% versus 13.5%), higher comorbidity levels (ADG score 11.8 versus 3.86), and  
51 higher disease-related risk factors such as smoking (36.7% versus 21.5%) and physical inactivity  
52 (61.4% versus 48.2%). (**Table 2**).  
53  
54  
55  
56  
57  
58  
59  
60

1  
2  
3 Life satisfaction had a strong unadjusted relationship with hospitalization for ACSC (unadjusted  
4 Kaplan Meir curves are shown in Supplement Figure 1). **Table 3** presents the unadjusted and  
5 adjusted hazard ratios for the relationship between life satisfaction and ACSC-related  
6 hospitalizations, which include models that adjusted for age and sex, and then further adjusted  
7 for socioeconomic and lifestyle factors. Although full adjustment does reduce the size of the  
8 effect, the hazard ratio of an individual with the lowest levels of life satisfaction (dissatisfied and  
9 very dissatisfied combined) compared to those who were very satisfied is 2.71 (95% confidence  
10 interval 1.87 to 3.93). The observed relationship follows a dose-response pattern, or in other  
11 words, the hazard ratios increase in size for each decreasing level of life satisfaction. For  
12 example, in the fully adjusted model, the hazard ratio for the middle life satisfaction category  
13 (neither satisfied nor dissatisfied) was 1.71 (95% confidence interval 1.36 to 2.14) while the  
14 satisfied category produced a hazard ratio of 1.32 (95% confidence interval 1.15 to 1.50).  
15 Furthermore, the additional analyses (**Table 4**) that controlled for ADG score, mood disease and  
16 anxiety separately did not substantially reduce the observed effect sizes with the added  
17 adjustment of ADG score having the largest impact (hazard ratio of 2.42, 95% confidence  
18 interval of 1.68 to 3.51). Finally, as the plot of survival by time according to life satisfaction  
19 produced parallel curves, the proportional hazards assumption was satisfied.

20  
21  
22  
23  
24  
25  
26 Regarding the joint effects model (**Table 5**), individuals who identified as having both low life  
27 satisfaction and low household income produced a fully adjusted hazard ratio of 3.80 (95%  
28 confidence interval 2.13 to 6.73). Therefore, in comparison to the fully adjusted model presented  
29 in Table 3 (hazard ratio of 2.71), poor SES individuals are at an increased risk of being  
30 hospitalized when reporting low life satisfaction.  
31  
32  
33

34 A range of sensitivity analyses were conducted to test the robustness of the study findings. Both  
35 the five-year survival model (where everyone was limited to a 5-year follow-up) and the model  
36 which excluded individuals who had an event within the first two years did not change the effect  
37 sizes to a significant degree. The hazard ratios for the lowest levels of life satisfaction compared  
38 to those who were very satisfied were 2.74 and 2.77, respectively (**Supplement Table 2**). In the  
39 competing risk analysis (**Supplement Table 3**), the unadjusted hazard ratios produced in the  
40 subdistribution hazard model were similar to those produced in the final model (4.38 vs 4.51  
41 respectively).  
42  
43  
44

## 45 Discussion

46 This study focuses on how life satisfaction can impact health system indicators such as avoidable  
47 hospitalizations in a general population cohort without a recent ACSC. We investigated this  
48 relationship and accounted for a wide variety of sociodemographic and behavioral risk factors.  
49 We saw a robust association that poor life satisfaction had a strong independent relationship with  
50 future ACSC hospitalizations. The lowest levels of life satisfaction (dissatisfied and very  
51 dissatisfied) being associated with almost a three times higher hazard of an avoidable  
52  
53  
54  
55  
56  
57  
58  
59  
60

1  
2  
3 hospitalization compared to those who were very satisfied after accounting for several  
4 sociodemographic and behavioural confounders.  
5

6  
7 Previous studies have linked life satisfaction and related exposures (e.g. positive affect or  
8 happiness) to health outcomes such as stroke (11) and heart disease. (10) Life satisfaction has  
9 also been shown to be associated with a wide variety of health behaviours. (30, 31) For instance,  
10 one study found that those who exercised more were generally happier.(32) Furthermore, life  
11 satisfaction has also been shown to be experienced differently across categories of  
12 socioeconomic status.(33) Due to the detailed survey variables available from the survey data  
13 and the linkage of these data to complete hospitalization outcomes from health administrative  
14 databases, were able to adjust for these health behaviours and measures of socioeconomic status  
15 in our analysis as well as examine how the influence of life satisfaction is strengthen or lessened  
16 across levels of socioeconomic status.  
17  
18  
19

20  
21 This study addresses an important gap in the literature by providing a robust population sample  
22 size and examining how life satisfaction related to a meaningful health system outcome. There  
23 are few studies that addresses life satisfaction or other forms of subjective well being and their  
24 relationship to hospitalizations for ACSCs. Furthermore, the existing research is limited by small  
25 sample sizes and limited follow-up times to capture the relatively rare ACSC event. This study  
26 also has more direct implications for the health system given ACSCs are defined as conditions  
27 for which hospitalizations should be prevented, given timely and effective access to primary  
28 care. (7) Considering the preventable nature of these conditions, hospitalizations for ACSCs are  
29 an ineffective use of healthcare resources and insight into the risk factors for these conditions can  
30 help improve health system functioning.  
31  
32  
33

34  
35 Unlike previous studies, we measured baseline life satisfaction on a sample who did not have an  
36 ACSC hospitalization in the two years prior while also presenting analyses that additionally  
37 controlled for comorbidity. These aspects of the study help mitigate the possibility that that poor  
38 life satisfaction could have been the result of the bidirectional relationship between poor health  
39 and life satisfaction. A possible explanation for the observed results is that individuals who  
40 experience poor life satisfaction tend to have higher rates of depression, given its observed  
41 relationship with poor health outcomes. (34, 35) To address this, we further adjusted for mood  
42 disease and found that this has little effect on attenuated the observed association. The survey did  
43 not include continuous measures that could capture sub-threshold levels or undiagnosed anxiety  
44 or depression.  
45  
46  
47  
48

### 49 Limitations

50 We acknowledge that this study has some limitations and interpretive cautions. First, this study  
51 was an observational study and although we controlled for several potential confounders and  
52 excluded those with a recent history of ACSC at baseline through linkage, we cannot rule out the  
53 possibility of unmeasured or residual confounding. We note however that the effect sizes are  
54 large, and this study did control for many more confounders than previous studies through a  
55  
56  
57  
58  
59  
60

1  
2  
3 combination of survey data in addition to health administrative variables to capture comorbidity.  
4 Second, we measured life satisfaction at one point in time (survey interview date). Research on  
5 life satisfaction has shown it to be consistent over time (36); however, it is possible that life  
6 satisfaction could have changed during the study period. Therefore, we only capture the effect  
7 from that initial time point and cannot account for the influence of changes in life satisfaction  
8 that happen following the baseline assessment. Furthermore, there are other instruments that can  
9 be used to assess life satisfaction that were not available in this survey. Finally, life satisfaction  
10 is a subjective measure. It has been shown to be an accurate and robust measure, it is still up to  
11 the individuals to judge and reflect on their life satisfaction. This means that its meaning can  
12 differ based on the individual, which can result in variation in the exposure. Despite these  
13 limitations, this study has still provided an essential contribution to the literature by being one of  
14 the first assessments of life satisfaction on avoidable hospitalization that utilizes a longitudinal  
15 population-based study design while measuring this exposure before the hospitalization outcome.  
16  
17  
18  
19  
20

### 21 Mechanisms

22 This study did not directly address mechanisms by which life satisfaction can influence  
23 avoidable hospitalizations; however, these have been studied by others. Out of the existing  
24 literature, there are three main mechanisms that could help explain the observed relationship:  
25 behavioural, health service use, and biological. Subjective well-being has been shown to impact  
26 a variety of health behaviours, such as increased physical activity (37-40) and reduced smoking  
27 habits (40). However, many of these studies lacked proper adjustment of confounding variables  
28 such as SES and psychological distress.(40) Regarding health service use, a study from 2014  
29 found that participants who were identified as having a greater purpose in life were more likely  
30 to receive preventative health services such as mammograms or colonoscopies.(41) What  
31 remains to be seen regarding this mechanism is whether the use of these services reflects access  
32 to primary care, or the decisions made by the individuals themselves to seek these services.  
33 However, a recent population-based cohort study noted how hospitalizations for ACSCs could  
34 not be explained by a lack of access to primary care (42), and therefore it is possible that this  
35 phenomenon is a result of individual decisions that are influenced by their satisfaction with life.  
36 Finally, biological mechanisms could also play a contributing role. A recent meta-analysis noted  
37 how individuals who were identified as having greater psychological well-being experienced  
38 favourable lipid profiles.(43) However, these associations were largely mitigated once  
39 behavioural characteristics were taken into account.(43) Our study did not compare the extent to  
40 which life satisfaction is associated with ACSC compared to other types of hospitalization. This  
41 was out of scope for this current study, but in a future analysis could help provide insight into  
42 mechanisms.  
43  
44  
45  
46  
47  
48  
49  
50

### 51 Conclusions

52 This study demonstrates that life satisfaction is associated with hospitalizations for ACSCs, even  
53 after controlling for socioeconomic characteristics, health behaviours, comorbidities and mental  
54 health factors. Furthermore, more socioeconomically deprived individuals were shown to be at  
55  
56  
57  
58  
59  
60

1  
2  
3 an increased risk. While governments plan to improve the sustainability and functioning of their  
4 health systems, there is a greater need to understand social supports that can improve life  
5 satisfaction costly and preventable conditions such as ACSCs. The findings of this study suggest  
6 that broader considerations, such as life satisfaction, can potentially influence avoidable  
7 hospitalizations, a burden to individuals and healthcare systems. Further research in this area  
8 may contribute to the development of wide-ranging approaches to target a potentially avoidable  
9 burden on the health system.  
10  
11  
12  
13  
14  
15  
16  
17  
18  
19  
20  
21  
22  
23  
24  
25  
26  
27  
28  
29  
30  
31  
32  
33  
34  
35  
36  
37  
38  
39  
40  
41  
42  
43  
44  
45  
46  
47  
48  
49  
50  
51  
52  
53  
54  
55  
56  
57  
58  
59  
60

For peer review only

## Tables

Table 1: Weighted<sup>a</sup> distributions of baseline characteristics across five levels of life satisfaction (N= 129,467)

|                                          | Very Satisfied (N= 49,502) | Satisfied (N= 67,978) | Neither Satisfied or Dissatisfied (N= 7,312) | Dissatisfied (N= 3,779) | Very Dissatisfied (N= 896) | Unweighted Ns (N= 129,467) |
|------------------------------------------|----------------------------|-----------------------|----------------------------------------------|-------------------------|----------------------------|----------------------------|
| <b>ACSC Hospitalization</b>              |                            |                       |                                              |                         |                            |                            |
| Yes                                      | 1.12                       | 1.61                  | 2.51                                         | 4.81                    | 5.39                       | 3,037                      |
| No                                       | 98.88                      | 98.39                 | 97.49                                        | 95.19                   | 94.61                      | 126,430                    |
| <b>Sex</b>                               |                            |                       |                                              |                         |                            |                            |
| Male                                     | 47.5                       | 50.53                 | 47.34                                        | 49.93                   | 47.32                      | 59,292                     |
| Female                                   | 52.5                       | 49.47                 | 52.66                                        | 50.07                   | 52.68                      | 70,175                     |
| <b>Age group</b>                         |                            |                       |                                              |                         |                            |                            |
| 18-34                                    | 30.64                      | 33.09                 | 30.78                                        | 23.91                   | 14.53                      | 35,255                     |
| 35-49                                    | 31.9                       | 33.21                 | 31.14                                        | 36.12                   | 33.6                       | 35,063                     |
| 50-64                                    | 26.31                      | 24.97                 | 27.37                                        | 31.04                   | 41.39                      | 38,662                     |
| 65-74                                    | 11.15                      | 8.72                  | 10.7                                         | 8.93                    | 10.49                      | 20,487                     |
| <b>BMI</b>                               |                            |                       |                                              |                         |                            |                            |
| Underweight < 18.5                       | 2.22                       | 2.79                  | 3.79                                         | 4.08                    | 3.35                       | 2,674                      |
| Normal weight, 18.5-24.9                 | 46.83                      | 46.02                 | 43.31                                        | 39.31                   | 37.18                      | 53,327                     |
| Overweight, 25-29.9                      | 35.48                      | 33.55                 | 32.37                                        | 31.78                   | 32.34                      | 43,915                     |
| Moderately obese, 30-34.9                | 11.72                      | 12.44                 | 13.15                                        | 15.62                   | 16.57                      | 17,840                     |
| Severely obese, > 34.9                   | 3.75                       | 5.2                   | 7.38                                         | 9.22                    | 10.57                      | 7,815                      |
| <b>ADG<sup>®</sup> Score<sup>b</sup></b> |                            |                       |                                              |                         |                            |                            |
| Mean (SD)                                | 3.42 (0.06)                | 3.95 (0.22)           | 5.76 (0.80)                                  | 7.29 (1.13)             | 10.13 (0.709)              | 129,467                    |
| <b>Physical Activity Status</b>          |                            |                       |                                              |                         |                            |                            |
| Active                                   | 32.24                      | 24.09                 | 18.2                                         | 16.94                   | 14.95                      | 35,482                     |
| Moderate                                 | 27.08                      | 24.73                 | 19.25                                        | 18.8                    | 14.5                       | 33,791                     |
| Inactive                                 | 40.65                      | 51.14                 | 62.22                                        | 64.2                    | 70.55                      | 60,149                     |
| <b>On-Marg Deprivation</b>               |                            |                       |                                              |                         |                            |                            |
| 1 (Least Marginalized)                   | 24.86                      | 20.76                 | 12.81                                        | 15.84                   | 15.43                      | 23,405                     |

|                                                                                                                                                                                                                                       |       |       |       |       |       |         |
|---------------------------------------------------------------------------------------------------------------------------------------------------------------------------------------------------------------------------------------|-------|-------|-------|-------|-------|---------|
| 2                                                                                                                                                                                                                                     | 22.03 | 20.22 | 18.21 | 15.72 | 13.13 | 25,427  |
| 3                                                                                                                                                                                                                                     | 19.84 | 19.72 | 18.93 | 19.23 | 17.55 | 26,391  |
| 4                                                                                                                                                                                                                                     | 16.74 | 18.99 | 22.71 | 20.01 | 21.85 | 26,386  |
| 5 (Most Marginalized)                                                                                                                                                                                                                 | 15.57 | 19.29 | 26.2  | 28.04 | 31.52 | 26,073  |
| <i>Education Level</i>                                                                                                                                                                                                                |       |       |       |       |       |         |
| < secondary                                                                                                                                                                                                                           | 4.62  | 6.52  | 9.87  | 12.4  | 12.91 | 12,302  |
| Secondary grad                                                                                                                                                                                                                        | 10.79 | 12.25 | 13.65 | 12.78 | 16.24 | 18,047  |
| > secondary                                                                                                                                                                                                                           | 79.93 | 75.6  | 69.26 | 68.55 | 61.28 | 94,084  |
| Unknown                                                                                                                                                                                                                               | 4.66  | 5.63  | 7.22  | 6.28  | 9.57  | 5,034   |
| <i>Alcohol Consumption</i>                                                                                                                                                                                                            |       |       |       |       |       |         |
| Heavy Drinker                                                                                                                                                                                                                         | 7.94  | 8.62  | 8.08  | 9.11  | 11.6  | 11,502  |
| Moderate Drinker                                                                                                                                                                                                                      | 24.62 | 20.19 | 15.43 | 12.57 | 7.58  | 17,934  |
| Light Drinker                                                                                                                                                                                                                         | 15.37 | 13.61 | 11.42 | 9.26  | 7.44  | 28,413  |
| Never Drinker                                                                                                                                                                                                                         | 50.79 | 56.33 | 63.66 | 67.55 | 71.93 | 69,785  |
| <i>Smoking Status</i>                                                                                                                                                                                                                 |       |       |       |       |       |         |
| Current Smoker                                                                                                                                                                                                                        | 17.38 | 22.71 | 31.65 | 36.52 | 43.75 | 30,875  |
| Former Smoker                                                                                                                                                                                                                         | 22.92 | 20.53 | 17.48 | 19.76 | 19.43 | 32,623  |
| Never Smoked                                                                                                                                                                                                                          | 56.06 | 53.48 | 48.15 | 40.86 | 34.91 | 61,357  |
| <i>Immigrant Status</i>                                                                                                                                                                                                               |       |       |       |       |       |         |
| Yes                                                                                                                                                                                                                                   | 26.22 | 33.84 | 40.73 | 36.21 | 29.25 | 25,228  |
| No                                                                                                                                                                                                                                    | 72.5  | 64.24 | 57.2  | 61.64 | 67.89 | 102,911 |
| <i>Household Income Quintile</i>                                                                                                                                                                                                      |       |       |       |       |       |         |
| Q1 (Lowest Income)                                                                                                                                                                                                                    | 9.5   | 14.16 | 23.52 | 32.29 | 38.88 | 17,369  |
| Q2                                                                                                                                                                                                                                    | 12.19 | 15.72 | 18.68 | 16.97 | 15.92 | 18,687  |
| Q3                                                                                                                                                                                                                                    | 16.34 | 17.68 | 16.93 | 15.25 | 15.41 | 24,063  |
| Q4                                                                                                                                                                                                                                    | 22.29 | 21.61 | 16.05 | 13.11 | 12.73 | 29,029  |
| Q5 (Highest Income)                                                                                                                                                                                                                   | 30.74 | 20.71 | 12.36 | 11.18 | 7.92  | 31,515  |
| Unknown                                                                                                                                                                                                                               | 8.94  | 10.12 | 12.47 | 11.2  | 9.13  | 8,804   |
| <p><sup>a</sup> Weighted through surveysampling weights provided by Statistics Canada.</p> <p><sup>b</sup> ADG<sup>®</sup> Score is a weighted score based on an individual's ADGs. This method has been validated elsewhere.(26)</p> |       |       |       |       |       |         |



Table 2: Weighted<sup>a</sup> distributions of baseline characteristics according to hospitalization for an ACSC (N= 129,467)

|                                          | ACSC<br>Hospitalization<br>Yes (N= 3,037) | ACSC<br>Hospitalization<br>No (N=<br>126,430) | Unweighted<br>N's |  |
|------------------------------------------|-------------------------------------------|-----------------------------------------------|-------------------|--|
| <b>Sex</b>                               |                                           |                                               |                   |  |
| Male                                     | 56.12                                     | 49.09                                         | 59,292            |  |
| Female                                   | 43.88                                     | 50.91                                         | 70,175            |  |
| <b>Age group</b>                         |                                           |                                               |                   |  |
| 18-34                                    | 9.35                                      | 32.07                                         | 35,255            |  |
| 35-49                                    | 20.5                                      | 32.89                                         | 35,063            |  |
| 50-64                                    | 48.6                                      | 25.49                                         | 38,662            |  |
| 65-74                                    | 21.56                                     | 9.55                                          | 20,487            |  |
| <b>BMI</b>                               |                                           |                                               |                   |  |
| Underweight <18.5                        | 2.19                                      | 2.68                                          | 2,674             |  |
| Normal Weight, 18.5 –<br>24.9            | 29.19                                     | 46.2                                          | 53,327            |  |
| Overweight, 25-29.9                      | 33.96                                     | 34.13                                         | 43,915            |  |
| Moderately obese, 30-<br>34.9            | 21.39                                     | 12.18                                         | 17,840            |  |
| Severely obese, >34.9                    | 13.27                                     | 4.8                                           | 7,815             |  |
| <b>ADG<sup>®</sup> Score<sup>b</sup></b> |                                           |                                               |                   |  |
| Mean (SD)                                | 11.8 (0.39)                               | 3.86 (0.05)                                   | 129,467           |  |
| <b>Physical Activity Status</b>          |                                           |                                               |                   |  |
| Active                                   | 17.33                                     | 26.64                                         | 35,482            |  |
| Moderate                                 | 21.27                                     | 25.12                                         | 33,791            |  |
| Inactive                                 | 61.41                                     | 48.2                                          | 60,149            |  |
| <b>On-Marg Deprivation</b>               |                                           |                                               |                   |  |
| (Least Deprived) 1                       | 14.91                                     | 21.74                                         | 23,405            |  |
| 2                                        | 19.67                                     | 20.62                                         | 25,427            |  |
| 3                                        | 16.62                                     | 19.74                                         | 26,391            |  |
| (Most Deprived) 4                        | 21.42                                     | 18.38                                         | 26,386            |  |
| <b>Education Level</b>                   |                                           |                                               |                   |  |
| Less than secondary                      | 19.16                                     | 6.01                                          | 12,302            |  |
| Secondary graduate                       | 15.18                                     | 11.78                                         | 18,047            |  |
| More than secondary                      | 60.1                                      | 76.81                                         | 94,084            |  |
| Unknown                                  | 5.57                                      | 5.4                                           | 5,034             |  |
| <b>Alcohol Consumption</b>               |                                           |                                               |                   |  |
| Heavy Drinker                            | 6.95                                      | 8.39                                          | 11,502            |  |

|                                                                                                                                                                                                                                        |       |       |         |  |
|----------------------------------------------------------------------------------------------------------------------------------------------------------------------------------------------------------------------------------------|-------|-------|---------|--|
| Moderate Drinker                                                                                                                                                                                                                       | 16.37 | 21.34 | 17,934  |  |
| Light Drinker                                                                                                                                                                                                                          | 9.67  | 14.05 | 28,413  |  |
| Never Drinker                                                                                                                                                                                                                          | 65.23 | 54.95 | 69,785  |  |
| <i>Smoking Status</i>                                                                                                                                                                                                                  |       |       |         |  |
| Current Smoker                                                                                                                                                                                                                         | 36.7  | 21.53 | 30,875  |  |
| Former Smoker                                                                                                                                                                                                                          | 29.26 | 21.07 | 32,623  |  |
| Never Smoked                                                                                                                                                                                                                           | 31.09 | 54.04 | 61,357  |  |
| <i>Immigrant Status</i>                                                                                                                                                                                                                |       |       |         |  |
| Yes                                                                                                                                                                                                                                    | 25.03 | 31.59 | 25,228  |  |
| No                                                                                                                                                                                                                                     | 72.45 | 66.71 | 102,911 |  |
| <i>Household Income</i>                                                                                                                                                                                                                |       |       |         |  |
| Q1 (Lowest Income)                                                                                                                                                                                                                     | 20.72 | 13.51 | 17,369  |  |
| Q2                                                                                                                                                                                                                                     | 16.09 | 14.61 | 18,687  |  |
| Q3                                                                                                                                                                                                                                     | 16.56 | 17.07 | 24,063  |  |
| Q4                                                                                                                                                                                                                                     | 17.57 | 21.31 | 29,029  |  |
| Q5 (Highest Income)                                                                                                                                                                                                                    | 18.58 | 23.65 | 31,515  |  |
| Unknown                                                                                                                                                                                                                                | 10.48 | 9.84  | 8,804   |  |
| <p><sup>a</sup> Weighted through survey sampling weights provided by Statistics Canada.</p> <p><sup>b</sup> ADG<sup>®</sup> Score is a weighted score based on an individual's ADGs. This method has been validated elsewhere.(26)</p> |       |       |         |  |

Table 3: Multivariable AHRs and 95% CIs From Proportional Hazards Regression (N= 129,467)

| Life Satisfaction                  | Unadjusted            |            | Age-Sex Adjusted      |            | Minimally Adjusted <sup>a</sup> |            | Fully Adjusted <sup>b</sup> |            |
|------------------------------------|-----------------------|------------|-----------------------|------------|---------------------------------|------------|-----------------------------|------------|
|                                    | HR (95% CI)           | p-value    | HR (95% CI)           | p-value    | HR (95% CI)                     | p-value    | HR (95% CI)                 | p-value    |
| Very Satisfied                     | (ref)                 | (ref)      | (ref)                 | (ref)      | (ref)                           | (ref)      | (ref)                       | (ref)      |
| Satisfied                          | 1.44<br>(1.27 - 1.64) | P < 0.0001 | 1.56<br>(1.37 - 1.77) | P < 0.0001 | 1.48<br>(1.30 - 1.69)           | P < 0.0001 | 1.32<br>(1.15 - 1.50)       | P < 0.0001 |
| Neither Satisfied or Dissatisfied  | 2.22<br>(1.79 - 2.76) | P < 0.0001 | 2.37<br>(1.91 - 2.95) | P < 0.0001 | 2.11<br>(1.69 - 2.65)           | P < 0.0001 | 1.71<br>(1.36 - 2.14)       | P < 0.0001 |
| Dissatisfied and Very Dissatisfied | 4.51<br>(3.17 - 6.41) | P < 0.0001 | 4.48<br>(3.16 - 6.34) | P < 0.0001 | 3.79<br>(2.66 - 5.41)           | P < 0.0001 | 2.71<br>(1.87 - 3.93)       | P < 0.0001 |

HR – hazard ratio, CI – confidence interval

<sup>a</sup> Minimally adjusted models controlled for age, sex and household income

<sup>b</sup> Fully adjusted models controlled for age, sex, household income, physical activity, BMI, alcohol consumption and smoking status

1  
2  
3  
4  
5  
6  
7  
8  
9  
10  
11  
12  
13  
14  
15  
16  
17  
18  
19  
20  
21  
22  
23  
24  
25  
26  
27  
28  
29  
30  
31  
32  
33  
34  
35  
36  
37  
38  
39  
40  
41  
42  
43  
44  
45  
46  
47

Table 4: Multivariable AHRs<sup>a</sup> and 95% CIs From Proportional Hazards Regression After Additionally Adjusting for ADG<sup>®</sup> score, Mood Disease and Anxiety (N= 129,467)

|                                    | Fully Adjusted with ADG <sup>®</sup> Score |            | Fully Adjusted with Mood Disease |            | Fully Adjusted with Anxiety |            |
|------------------------------------|--------------------------------------------|------------|----------------------------------|------------|-----------------------------|------------|
|                                    | HR (95% CI)                                | p-value    | HR (95% CI)                      | p-value    | HR (95% CI)                 | p-value    |
| <i>Life Satisfaction</i>           |                                            |            |                                  |            |                             |            |
| Very Satisfied                     | (ref)                                      | (ref)      | (ref)                            | (ref)      | (ref)                       | (ref)      |
| Satisfied                          | 1.28 (1.12 - 1.46)                         | 0.0004     | 1.30 (1.13 - 1.50)               | 0.0002     | 1.31 (1.14 - 1.49)          | 0.0001     |
| Neither Satisfied or Dissatisfied  | 1.56 (1.25 - 1.96)                         | 0.0001     | 1.62 (1.29 - 2.05)               | P < 0.0001 | 1.65 (1.31 - 2.08)          | P < 0.0001 |
| Dissatisfied and Very Dissatisfied | 2.42 (1.68 - 3.51)                         | P < 0.0001 | 2.45 (1.68 - 3.55)               | P < 0.0001 | 2.52 (1.76 - 3.61)          | P < 0.0001 |

HR – hazard ratio, CI – confidence interval  
<sup>a</sup> Both models controlled for age, sex, household income, physical activity, BMI, alcohol consumption, smoking status in addition to the variable specified.

Table 5: Multivariable AHRs and 95% CIs From Joint Effects Models (N= 129,467)

|                                                                                                                         | Unadjusted          |            | Fully Adjusted <sup>a</sup> |            |
|-------------------------------------------------------------------------------------------------------------------------|---------------------|------------|-----------------------------|------------|
|                                                                                                                         | HR (95% CI)         | p-value    | HR (95% CI)                 | p-value    |
| <b>Joint Effects</b>                                                                                                    |                     |            |                             |            |
| High Life Satisfaction and High Income                                                                                  | 1.00                | (ref)      | 1.00                        | (ref)      |
| High Life Satisfaction and Middle Income                                                                                | 1.40 (1.18 – 1.65)  | P < 0.0001 | 1.18 (0.99 – 1.40)          | 0.0581     |
| High Life Satisfaction and Low Income                                                                                   | 2.00 (1.66 – 2.42)  | P < 0.0001 | 1.63 (1.35 – 1.99)          | P < 0.0001 |
| Neither Satisfied Nor Dissatisfied and High Income                                                                      | 1.84 (1.16 – 2.93)  | 0.0099     | 1.55 (0.98 – 2.46)          | 0.0614     |
| Neither Satisfied Nor Dissatisfied and Middle Income                                                                    | 2.46 (1.84 – 3.29)  | P < 0.0001 | 1.92 (1.42 – 2.60)          | P < 0.0001 |
| Neither Satisfied Nor Dissatisfied and Low Income                                                                       | 2.44 (1.7 – 3.53)   | P < 0.0001 | 1.68 (1.16 – 2.45)          | 0.0067     |
| Low Life Satisfaction and High Income                                                                                   | 3.71 (1.08 – 12.78) | 0.0377     | 2.81 (0.80 – 9.91)          | 0.1068     |
| Low Life Satisfaction and Middle Income                                                                                 | 3.67 (2.67 – 5.03)  | P < 0.0001 | 2.30 (1.66 – 3.18)          | P < 0.0001 |
| Low Life Satisfaction and Low Income                                                                                    | 6.95 (3.91 – 12.38) | P < 0.0001 | 3.80 (2.13 – 6.73)          | P < 0.0001 |
| HR – hazard ratio, CI – confidence interval                                                                             |                     |            |                             |            |
| <sup>a</sup> Fully adjusted models controlled for age, sex, physical activity, BMI, alcohol consumption, smoking status |                     |            |                             |            |

1  
2  
3  
4  
5  
6  
7  
8  
9  
10  
**Contributors:** LCR and VG conceptualized the study, TW created the database and ED planned the analysis, analyzed the data, and drafted and revised the paper. LCR is the guarantor. All authors contributed to the manuscript and revised the draft paper. All have approved the final version for publication.

11  
12  
13  
**Funding:** This research was supported by a Canada Research Chair held by LCR (CRC-950-23072).

14  
15  
16  
17  
18  
**Disclaimer:** This study was supported by ICES, which is funded by an annual grant from the Ontario Ministry of Health and Long-Term Care. The opinions, results and conclusions reported in this paper are those of the authors and are independent from the funding sources.

19  
20  
21  
**Competing interests:** None declared

22  
23  
24  
25  
26  
27  
28  
29  
30  
31  
32  
33  
**Data sharing statement:** The data set from this study is held securely in coded form at ICES. While data sharing agreements prohibit ICES from making the data set publicly available, access may be granted to those who meet prespecified criteria for confidential access (available at [www.ices.on.ca/DAS](http://www.ices.on.ca/DAS)). The full data set creation plan and underlying analytic code are available from the authors upon request, understanding that the programs may rely upon coding templates or macros that are unique to ICES.

34  
35  
36  
37  
38  
39  
40  
41  
42  
43  
44  
45  
46  
47  
48  
49  
50  
51  
52  
53  
54  
55  
56  
57  
58  
59  
60  
Figure 1: Flow chart of study participants

## References

1. Zaninotto P, Wardle J, Steptoe A. Sustained enjoyment of life and mortality at older ages: analysis of the English Longitudinal Study of Ageing. *BMJ*. 2016;355:i6267.
2. Boehm JK, Trudel-Fitzgerald C, Kivimaki M, Kubzansky LD. The prospective association between positive psychological well-being and diabetes. *Health Psychol*. 2015;34(10):1013-21.
3. Sabatini F. The relationship between happiness and health: evidence from Italy. *Soc Sci Med*. 2014;114:178-87.
4. Carrière GM, Kumar MB, Sanmartin C. Hospitalization for ambulatory care sensitive conditions among urban Métis adults. *Health Rep*. 2017;28(12):3-11.
5. Caminal J, Starfield B, Sánchez E, Casanova C, Morales M. The role of primary care in preventing ambulatory care sensitive conditions. *Eur J Public Health*. 2004;14(3):246-51.
6. Brown AD, Goldacre MJ, Hicks N, Rourke JT, McMurtry RY, Brown JD, et al. Hospitalization for ambulatory care-sensitive conditions: a method for comparative access and quality studies using routinely collected statistics. *Can J Public Health*. 2001;92(2):155-9.
7. Billings J, Teicholz N. Uninsured patients in District of Columbia hospitals. *Health Aff (Millwood)*. 1990;9(4):158-65.
8. Magan P, Otero A, Alberquilla A, Ribera JM. Geographic variations in avoidable hospitalizations in the elderly, in a health system with universal coverage. *BMC Health Serv Res*. 2008;8:42.
9. Tomkins S. *Affect Imagery Consciousness: The Positive Affects*. New York: Springer Publishing Inc; 1963.
10. Davidson KW, Mostofsky E, Whang W. Don't worry, be happy: positive affect and reduced 10-year incident coronary heart disease: The Canadian Nova Scotia Health Survey. *European Heart Journal*. 2010;31(9):1065-70.
11. Feller S, Teucher B, Kaaks R, Boeing H, Vigl M. Life Satisfaction and Risk of Chronic Diseases in the European Prospective Investigation into Cancer and Nutrition (EPIC)-Germany Study. *PLOS ONE*. 2013;8(8):e73462.
12. Grant N, Wardle J, Steptoe A. The relationship between life satisfaction and health behavior: a cross-cultural analysis of young adults. *Int J Behav Med*. 2009;16(3):259-68.
13. Goel V, Rosella LC, Fu L, Alberga A. The Relationship Between Life Satisfaction and Healthcare Utilization: A Longitudinal Study. *Am J Prev Med*. 2018;55(2):142-50.
14. Audulv Å, Ghahari S, Kephart G, Warner G, Packer TL. The Taxonomy of Everyday Self-management Strategies (TEDSS): A framework derived from the literature and refined using empirical data. *Patient Education and Counseling*. 2019;102(2):367-75.
15. Schulman-Green D, Jaser SS, Park C, Whittemore R. A metasynthesis of factors affecting self-management of chronic illness. *Journal of advanced nursing*. 2016;72(7):1469-89.
16. Liddy C, Blazkho V, Mill K. Challenges of self-management when living with multiple chronic conditions: systematic review of the qualitative literature. *Canadian family physician Medecin de famille canadien*. 2014;60(12):1123-33.
17. Konstam V, Salem D, Pouleur H, Kostis J, Gorkin L, Shumaker S, et al. Baseline Quality of Life as a Predictor of Mortality and Hospitalization in 5,025 Patients With Congestive Heart Failure. *The American Journal of Cardiology*. 1996;78(8):890-5.

18. González-Freire B, Vázquez-Rodríguez I, Marcos-Velázquez P, de la Cuesta CG. Repression and coping styles in asthmatic patients. *J Clin Psychol Med Settings*. 2010;17(3):220-9.
19. Scheier MF, Matthews KA, Owens JF, Schulz R, Bridges MW, Magovern GJ, et al. Optimism and rehospitalization after coronary artery bypass graft surgery. *Arch Intern Med*. 1999;159(8):829-35.
20. Ronaldson A, Molloy GJ, Wikman A, Poole L, Kaski JC, Steptoe A. Optimism and recovery after acute coronary syndrome: a clinical cohort study. *Psychosom Med*. 2015;77(3):311-8.
21. Sanmartin CA, Khan S, Statistics Canada., Canadian Electronic Library (Firm). Hospitalizations for ambulatory care sensitive conditions (ACSC) the factors that matter. Ottawa, Ont.: Statistics Canada; 2011. Available from: [http://myaccess.library.utoronto.ca/login?url=http://books.scholarsportal.info/viewdoc.html?id=/ebooks/ebooks1/gibson\\_chrc/2011-10-10/1/10490988Available](http://myaccess.library.utoronto.ca/login?url=http://books.scholarsportal.info/viewdoc.html?id=/ebooks/ebooks1/gibson_chrc/2011-10-10/1/10490988Available) from: <http://publications.gc.ca/pub?id=389238&sl=0>.
22. Canadian Community Health Survey- Annual Component (CCHS) 2016 [updated 2016-01-11. Available from: <http://www23.statcan.gc.ca/imdb/p2SV.pl?Function=getSurvey&Id=259374>.
23. Statistics Canada. Canadian Community Health Survey, 2003: User Guide for the Public Use of Microdata File. Ottawa 2005.
24. Information ClfH. Indicator Library: Ambulatory Care Sensitive Conditions [Available from: <http://indicatorlibrary.cihi.ca/display/HSPIL/Ambulatory+Care+Sensitive+Conditions>.
25. Weiner JP, Abrams C, Bodycombe D. The Johns Hopkins ACG case-mix system version 6.0 release notes. Baltimore: Johns Hopkins Bloomberg School of Public Health. 2003.
26. Austin PC, van Walraven C, Wodchis WP, Newman A, Anderson GM. Using the Johns Hopkins Aggregated Diagnosis Groups (ADGs) to predict mortality in a general adult population cohort in Ontario, Canada. *Med Care*. 2011;49(10):932-9.
27. Matheson FI, Dunn JR, Smith KL, Moineddin R, Glazier RH. Development of the Canadian Marginalization Index: a new tool for the study of inequality. *Can J Public Health*. 2012;103(8 Suppl 2):S12-6.
28. Fine JP, Gray RJ. A Proportional Hazards Model for the Subdistribution of a Competing Risk. *Journal of the American Statistical Association*. 1999;94(446):496-509.
29. Kolenikov S. Resampling variance estimation for complex survey data. *Stata Journal*. 2010;10(2):165-99.
30. Lyubomirsky S, King L, Diener E. The benefits of frequent positive affect: does happiness lead to success? *Psychol Bull*. 2005;131(6):803-55.
31. Pressman SD, Cohen S. Does positive affect influence health? *Psychol Bull*. 2005;131(6):925-71.
32. Lathia N, Sandstrom GM, Mascolo C, Rentfrow PJ. Happier People Live More Active Lives: Using Smartphones to Link Happiness and Physical Activity. *PLoS One*. 2017;12(1):e0160589.
33. Barger SD, Donoho CJ, Wayment HA. The relative contributions of race/ethnicity, socioeconomic status, health, and social relationships to life satisfaction in the United States. *Quality of Life Research*. 2009;18(2):179-89.



- 1  
2  
3 34. Cuijpers P, de Graaf R, van Dorsselaer S. Minor depression: risk profiles, functional  
4 disability, health care use and risk of developing major depression. *Journal of Affective*  
5 *Disorders*. 2004;79(1):71-9.  
6  
7 35. Black SA, Markides KS, Ray LA. Depression predicts increased incidence of adverse  
8 health outcomes in older Mexican Americans with type 2 diabetes. *Diabetes care*.  
9 2003;26(10):2822-8.  
10  
11 36. Bonikowska A, Helliwell J, Hou F, Schellenberg G. An Assessment of Life Satisfaction  
12 Responses on Recent Statistics Canada Surveys. *Social Indicators Research*. 2014;118(2):617-43.  
13  
14 37. Baruth M, Lee DC, Sui X, Church TS, Marcus BH, Wilcox S, et al. Emotional outlook on life  
15 predicts increases in physical activity among initially inactive men. *Health Educ Behav*.  
16 2011;38(2):150-8.  
17  
18 38. Kim ES, Kubzansky LD, Soo J, Boehm JK. Maintaining Healthy Behavior: a Prospective  
19 Study of Psychological Well-Being and Physical Activity. *Ann Behav Med*. 2017;51(3):337-47.  
20  
21 39. Sin NL, Moskowitz JT, Whooley MA. Positive Affect and Health Behaviors Across 5 Years  
22 in Patients With Coronary Heart Disease: The Heart and Soul Study. *Psychosom Med*.  
23 2015;77(9):1058-66.  
24  
25 40. Boehm Julia K, Chen Y, Koga H, Mathur Maya B, Vie Loryana L, Kubzansky Laura D. Is  
26 Optimism Associated With Healthier Cardiovascular-Related Behavior? *Circulation Research*.  
27 2018;122(8):1119-34.  
28  
29 41. Kim ES, Strecher VJ, Ryff CD. Purpose in life and use of preventive health care services.  
30 *Proc Natl Acad Sci U S A*. 2014;111(46):16331-6.  
31  
32 42. Vuik SI, Fontana G, Mayer E, Darzi A. Do hospitalisations for ambulatory care sensitive  
33 conditions reflect low access to primary care? An observational cohort study of primary care  
34 usage prior to hospitalisation. *BMJ Open*. 2017;7(8):e015704.  
35  
36 43. Soo J, Kubzansky LD, Chen Y, Zevon ES, Boehm JK. Psychological well-being and  
37 restorative biological processes: HDL-C in older English adults. *Soc Sci Med*. 2018;209:59-66.  
38  
39  
40  
41  
42  
43  
44  
45  
46  
47  
48  
49  
50  
51  
52  
53  
54  
55  
56  
57  
58  
59  
60

1  
2  
3  
4  
5  
6  
7  
8  
9  
10  
11  
12  
13  
14  
15  
16  
17  
18  
19  
20  
21  
22  
23  
24  
25  
26  
27  
28  
29  
30  
31  
32  
33  
34  
35  
36  
37  
38  
39  
40  
41  
42  
43  
44  
45  
46  
47  
48  
49  
50  
51  
52  
53  
54  
55  
56  
57  
58  
59  
60

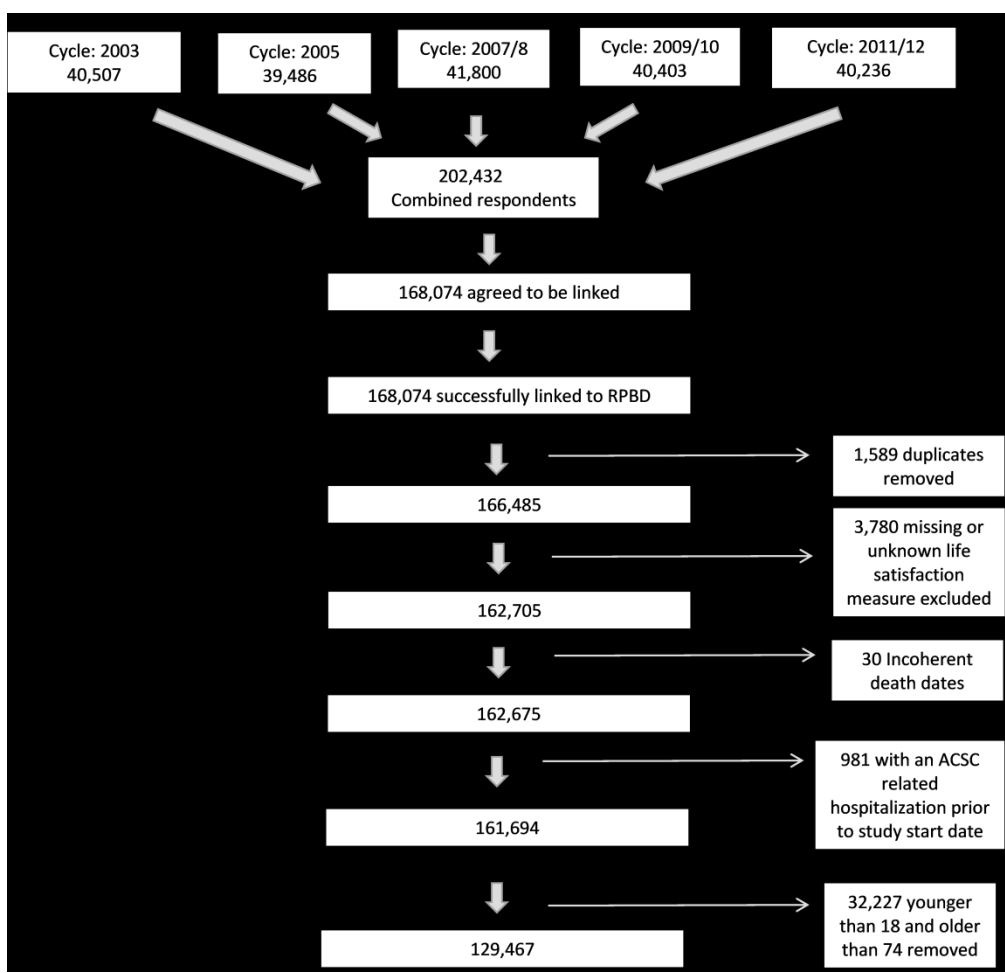

Figure 1: Flow chart of study participants

## Supplement Table 1:

ICD-10-CA/ CCI codes for ACSC hospitalizations<sup>1</sup>

| Condition                                                                                                                                                                                                                                                                                                                                                                                                                                                                                                                                                                                                                                                                                                                                                                                                                                                                                                                                                                                                                              | ICD-10-CA Code(s)                                                                                                                                                    |
|----------------------------------------------------------------------------------------------------------------------------------------------------------------------------------------------------------------------------------------------------------------------------------------------------------------------------------------------------------------------------------------------------------------------------------------------------------------------------------------------------------------------------------------------------------------------------------------------------------------------------------------------------------------------------------------------------------------------------------------------------------------------------------------------------------------------------------------------------------------------------------------------------------------------------------------------------------------------------------------------------------------------------------------|----------------------------------------------------------------------------------------------------------------------------------------------------------------------|
| Grand mal status and other epileptic convulsions                                                                                                                                                                                                                                                                                                                                                                                                                                                                                                                                                                                                                                                                                                                                                                                                                                                                                                                                                                                       | G40, G41                                                                                                                                                             |
| Chronic obstructive pulmonary disease (COPD)                                                                                                                                                                                                                                                                                                                                                                                                                                                                                                                                                                                                                                                                                                                                                                                                                                                                                                                                                                                           | J41, J42, J43, J44, J47<br><br>(only when a secondary diagnosis of J44 is also present) J10.0, J11.0, J12–J16, J18, J20, J21, J22                                    |
| Asthma                                                                                                                                                                                                                                                                                                                                                                                                                                                                                                                                                                                                                                                                                                                                                                                                                                                                                                                                                                                                                                 | J45                                                                                                                                                                  |
| Diabetes                                                                                                                                                                                                                                                                                                                                                                                                                                                                                                                                                                                                                                                                                                                                                                                                                                                                                                                                                                                                                               | E10.0, E10.1, E10.63, E10.64, E10.9<br><br>E11.0, E11.1, E11.63, E11.64, E11.9<br><br>E13.0, E13.1, E13.63, E13.64, E13.9<br><br>E14.0, E14.1, E14.63, E14.64, E14.9 |
| Hypertension*                                                                                                                                                                                                                                                                                                                                                                                                                                                                                                                                                                                                                                                                                                                                                                                                                                                                                                                                                                                                                          | I10.0, I10.1, I11                                                                                                                                                    |
| Heart Failure and pulmonary edema                                                                                                                                                                                                                                                                                                                                                                                                                                                                                                                                                                                                                                                                                                                                                                                                                                                                                                                                                                                                      | I50, J81                                                                                                                                                             |
| Angina*                                                                                                                                                                                                                                                                                                                                                                                                                                                                                                                                                                                                                                                                                                                                                                                                                                                                                                                                                                                                                                | I20, I23.82, I24.0, I24.8, I24.9                                                                                                                                     |
| <p>*Excluding cases with cardiac procedures, CCI codes for exclusion:</p> <p>1.HA.58.^, 1.HA.80.^, 1.HA.87.^, 1.HB.53.^, 1.HB.54.^, 1.HB.55.^, 1.HB.87.^, 1.HD.53.^, 1.HD.54.^, 1.HD.55.^, 1.HH.59.^, 1.HH.71.^, 1.HJ.76.^, 1.HJ.82.^, 1.HM.57.^, 1.HM.78.^, 1.HM.80.^, 1.HN.71.^, 1.HN.80.^, 1.HN.87.^, 1.HP.76.^, 1.HP.78.^, 1.HP.80.^, 1.HP.82.^, 1.HP.83.^, 1.HP.87.^, 1.HR.71.^, 1.HR.80.^, 1.HR.84.^, 1.HR.87.^, 1.HS.80.^, 1.HS.90.^, 1.HT.80.^, 1.HT.89.^, 1.HT.90.^, 1.HU.80.^, 1.HU.90.^, 1.HV.80.^, 1.HV.90.^, 1.HW.78.^, 1.HW.79.^, 1.HX.71.^, 1.HX.78.^, 1.HX.79.^, 1.HX.80.^, 1.HX.83.^, 1.HX.86.^, 1.HX.87.^, 1.HY.85.^, 1.HZ.53 rubric (except 1.HZ.53.LA-KP), 1.HZ.54.^, 1.HZ.55 rubric (except 1.HZ.55.LA-KP), 1.HZ.56.^, 1.HZ.57.^, 1.HZ.59.^, 1.HZ.80.^, 1.HZ.85.^, 1.HZ.87.^, 1.IF.83.^, 1.IJ.50.^, 1.IJ.54.GQ-AZ, 1.IJ.55.^, 1.IJ.57.^, 1.IJ.76.^, 1.IJ.80.^, 1.IJ.86.^, 1.IK.50.^, 1.IK.57.^, 1.IK.80.^, 1.IK.87.^, 1.IN.84.^, 1.LA.84.^, 1.LC.84.^, 1.LD.84.^, 1.YY.54.LA-NJ, 1.YY.54.LA-FS, 1.YY.54.LA-NM</p> |                                                                                                                                                                      |

<sup>1</sup> More information on CIHI methodology: <http://indicatorlibrary.cihi.ca/display/HSPIL/Ambulatory+Care+Sensitive+Conditions>  
For peer review only - <http://bmjopen.bmj.com/site/about/guidelines.xhtml>

Supplement Table 2: Multivariable AHRs <sup>a</sup> and 95% CIs Across Sensitivity Analyses

|                                                                                                                                                                                                                                                                                                                                                                | Five-year survival <sup>b</sup> (N= 129,467) |            | Excluding events from first two years <sup>c</sup> (N= 128,638) |            |
|----------------------------------------------------------------------------------------------------------------------------------------------------------------------------------------------------------------------------------------------------------------------------------------------------------------------------------------------------------------|----------------------------------------------|------------|-----------------------------------------------------------------|------------|
|                                                                                                                                                                                                                                                                                                                                                                | HR (95% CI)                                  | p-value    | HR (95% CI)                                                     | p-value    |
| <b>Life Satisfaction</b>                                                                                                                                                                                                                                                                                                                                       |                                              |            |                                                                 |            |
| Very Satisfied                                                                                                                                                                                                                                                                                                                                                 | (ref)                                        | (ref)      | (ref)                                                           | (ref)      |
| Satisfied                                                                                                                                                                                                                                                                                                                                                      | 1.32 (1.16 – 1.51)                           | P < 0.0001 | 1.38 (1.17 – 1.62)                                              | P < 0.0001 |
| Neither Satisfied or Dissatisfied                                                                                                                                                                                                                                                                                                                              | 1.71 (1.36 – 2.14)                           | P < 0.0001 | 1.74 (1.33 – 2.28)                                              | P < 0.0001 |
| Dissatisfied and Very Dissatisfied                                                                                                                                                                                                                                                                                                                             | 2.74 (1.89 – 3.98)                           | P < 0.0001 | 2.77 (1.69 – 4.55)                                              | P < 0.0001 |
| <sup>a</sup> All models were fully adjusted models which controlled for age, sex, physical activity, BMI, alcohol consumption, smoking status.<br><sup>b</sup> Five-year survival models were run with a consistent survival time of five years.<br><sup>c</sup> Models were run without individuals who had an event within the first two years of follow-up. |                                              |            |                                                                 |            |

Supplement Table 3: Unadjusted HRs from The Subdistribution Hazard Model <sup>a</sup>

|                                                                                 | HR (95% CI)        | p-value    |
|---------------------------------------------------------------------------------|--------------------|------------|
| <b>Life Satisfaction</b>                                                        |                    |            |
| Very Satisfied                                                                  | (ref)              | (ref)      |
| Satisfied                                                                       | 1.44 (1.30 - 1.60) | P < 0.0001 |
| Neither Satisfied or Dissatisfied                                               | 2.20 (1.86 - 2.60) | P < 0.0001 |
| Dissatisfied and Very Dissatisfied                                              | 4.38 (3.73 - 5.14) | P < 0.0001 |
| <sup>a</sup> Subdistribution hazard model considered death as a competing risk. |                    |            |

Supplement Figure 1. Kaplan Meir survival curves for Life Satisfaction (most dissatisfied = 5; lease dissatisfied = 1)

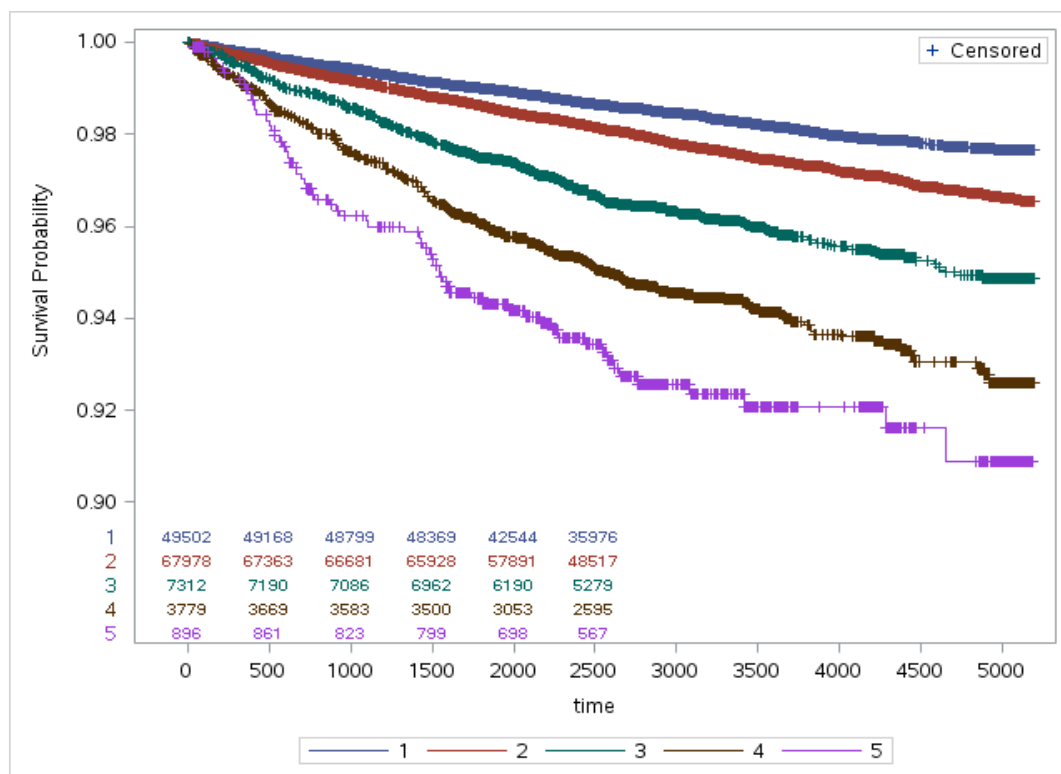

STROBE Checklist – Location of Specific Items for “The relationship between life satisfaction and preventable hospitalizations: a longitudinal population-based cohort study”

|                           | Item No | Page Number                                                                                                      |
|---------------------------|---------|------------------------------------------------------------------------------------------------------------------|
| <b>Title and abstract</b> | 1       | (a) Cover page (title page)<br>(b) Abstract: 1                                                                   |
| <b>Introduction</b>       |         |                                                                                                                  |
| Background/rationale      | 2       | 5                                                                                                                |
| Objectives                | 3       | 5 to 6                                                                                                           |
| <b>Methods</b>            |         |                                                                                                                  |
| Study design              | 4       | 6                                                                                                                |
| Setting                   | 5       | 6                                                                                                                |
| Participants              | 6       | 6                                                                                                                |
| Variables                 | 7       | 6 to 7                                                                                                           |
| Data sources/ measurement | 8       | 6 to 8                                                                                                           |
| Bias                      | 9       | 6                                                                                                                |
| Study size                | 10      | 3                                                                                                                |
| Quantitative variables    | 11      | 6 to 7                                                                                                           |
| Statistical methods       | 12      | (a) Describe all statistical methods: 6 to 8<br>(b) Subgroups and interactions: 8<br>(c) Sensitivity Analyses: 8 |
| <b>Results</b>            |         |                                                                                                                  |
| Participants              | 13      | 8 and Figure 1                                                                                                   |
| Descriptive data          | 14      | 8 and Table 1 to 2                                                                                               |
| Outcome data              | 15      | 9 and Table 3                                                                                                    |
| Main results              | 16      | 9 to 10 and Tables 3 to 4                                                                                        |
| Other analyses            | 17      | 10 and Supplement Tables 1-3                                                                                     |
| <b>Discussion</b>         |         |                                                                                                                  |
| Key results               | 18      | 10 to 11                                                                                                         |
| Limitations               | 19      | 11                                                                                                               |
| Interpretation            | 20      | 11 to 12                                                                                                         |
| Generalisability          | 21      | 10                                                                                                               |
| <b>Other information</b>  |         |                                                                                                                  |
| Funding                   | 22      | 19                                                                                                               |

# BMJ Open

## The relationship between life satisfaction and preventable hospitalizations: a population-based cohort study in Ontario, Canada

|                                 |                                                                                                                                                                                                                                                                                                                                                                                   |
|---------------------------------|-----------------------------------------------------------------------------------------------------------------------------------------------------------------------------------------------------------------------------------------------------------------------------------------------------------------------------------------------------------------------------------|
| Journal:                        | <i>BMJ Open</i>                                                                                                                                                                                                                                                                                                                                                                   |
| Manuscript ID                   | bmjopen-2019-032837.R2                                                                                                                                                                                                                                                                                                                                                            |
| Article Type:                   | Original research                                                                                                                                                                                                                                                                                                                                                                 |
| Date Submitted by the Author:   | 06-Feb-2020                                                                                                                                                                                                                                                                                                                                                                       |
| Complete List of Authors:       | De Prophetis, Eric; University of Toronto, Dalla Lana School of Public Health<br>Goel, Vivek; University of Toronto, Dalla Lana School of Public Health; University of Toronto, Institute of Health Policy, Management and Evaluation<br>Watson, Tristan; Institute for Clinical Evaluative Sciences<br>Rosella, Laura; University of Toronto, Dalla Lana School of Public Health |
| <b>Primary Subject Heading</b>: | Epidemiology                                                                                                                                                                                                                                                                                                                                                                      |
| Secondary Subject Heading:      | Health services research, Health policy                                                                                                                                                                                                                                                                                                                                           |
| Keywords:                       | Life Satisfaction, Avoidable hospitalization, EPIDEMIOLOGY                                                                                                                                                                                                                                                                                                                        |
|                                 |                                                                                                                                                                                                                                                                                                                                                                                   |

SCHOLARONE™  
Manuscripts



I, the Submitting Author has the right to grant and does grant on behalf of all authors of the Work (as defined in the below author licence), an exclusive licence and/or a non-exclusive licence for contributions from authors who are: i) UK Crown employees; ii) where BMJ has agreed a CC-BY licence shall apply, and/or iii) in accordance with the terms applicable for US Federal Government officers or employees acting as part of their official duties; on a worldwide, perpetual, irrevocable, royalty-free basis to BMJ Publishing Group Ltd ("BMJ") its licensees and where the relevant Journal is co-owned by BMJ to the co-owners of the Journal, to publish the Work in this journal and any other BMJ products and to exploit all rights, as set out in our [licence](#).

The Submitting Author accepts and understands that any supply made under these terms is made by BMJ to the Submitting Author unless you are acting as an employee on behalf of your employer or a postgraduate student of an affiliated institution which is paying any applicable article publishing charge ("APC") for Open Access articles. Where the Submitting Author wishes to make the Work available on an Open Access basis (and intends to pay the relevant APC), the terms of reuse of such Open Access shall be governed by a Creative Commons licence – details of these licences and which [Creative Commons](#) licence will apply to this Work are set out in our licence referred to above.

Other than as permitted in any relevant BMJ Author's Self Archiving Policies, I confirm this Work has not been accepted for publication elsewhere, is not being considered for publication elsewhere and does not duplicate material already published. I confirm all authors consent to publication of this Work and authorise the granting of this licence.



1  
2  
3  
4 The relationship between life satisfaction and preventable hospitalizations: a population-  
5 based cohort study in Ontario, Canada  
6  
7

8  
9 Eric De Prophetis<sup>a</sup>, MSc; Vivek Goel<sup>a,b</sup>, MD MSc; Tristan Watson<sup>b</sup>, MPH; Laura  
10 Rosella<sup>a,b,c</sup>, PhD, MHSc;  
11  
12

13  
14  
15 a Dalla Lana School of Public Health, University of Toronto, Toronto, ON, Canada

16 b ICES, Toronto, ON, Canada

17 c Public Health Ontario, Toronto, ON, Canada  
18  
19

20  
21 WORD COUNT: 3,390  
22

23 ADDRESS CORRESPONDANCE AND REPRINT REQUESTS TO:  
24

25 Professor Laura Rosella  
26 University of Toronto  
27 155 College St  
28 Health Sciences Bldg, 6th floor  
29 Toronto, ON, M5T 3M7  
30 laura.rosella@utoronto.ca  
31  
32  
33  
34  
35  
36  
37  
38  
39  
40  
41  
42  
43  
44  
45  
46  
47  
48  
49  
50  
51  
52  
53  
54  
55  
56  
57  
58  
59  
60

## Abstract

**Objective:** To examine if low life satisfaction is associated with an increased risk of being hospitalized for an ambulatory care sensitive condition (ACSC), in comparison to high life satisfaction

**Design and setting:** Population-based cohort study of adults from Ontario, Canada. Baseline data was captured through the Canadian Community Health Survey (CCHS) and linked to health administrative data for follow-up information.

**Participants:** 129,467 men and women between the ages of 18 to 74.

**Main outcome measures:** Time to avoidable hospitalizations defined by ACSCs.

**Results:** Life satisfaction was measured at baseline through the CCHS and follow-up information on ACSC hospitalizations were captured by linking participant respondents to hospitalization records covered under a single payer health system. Within the study timeframe (maximum of 14 years), 3037 individuals were hospitalized. Older men in the lowest household income quintile were more likely to be hospitalized with an ACSC. After controlling for age, sex, socioeconomic (SES), and other behavioural factors, low life satisfaction at baseline had a strong relationship with future hospitalizations for ACSCs (hazard ratio 2.71; 95% CI, 1.87-3.93). The hazards were highest for those who jointly had the lowest levels of life satisfaction and low household income (hazard ratio 3.80; 95% CI, 2.13-6.73). Results did not meaningful change after running a competing risk survival analysis.

**Conclusions:** This study demonstrates that poor life satisfaction is associated with hospitalizations for ACSCs after adjustment for several confounders. Furthermore, the magnitude of this relationship was greater for those who were more socioeconomically disadvantaged. This study adds to the existing literature on the impact of life satisfaction on health system outcomes by documenting its impact on avoidable hospitalizations in a universal health system.

## Strengths and Limitations

- This is the largest study to combine detailed survey variables linked to complete hospitalization outcomes from health administrative databases to study the impact of life satisfaction on ambulatory care sensitive conditions (ACSCs).
- The linkage of various databases allowed for control of a wide range of confounders in addition to objective measures of comorbidity.
- The linkage and study design allowed measurement of baseline life satisfaction on a sample of individuals who did not have an ACSCs in the two years prior, which overcomes a limitation of previous studies that may have been influenced by the bidirectional relationship between poor health and life satisfaction.
- Life satisfaction was measured at one point in time and thus we were unable to capture changes in life satisfaction over the study period.
- This study did not directly address mechanisms by which life satisfaction could influence ACSCs.

## Introduction

There has been broad recognition that upstream determinants have an influence on a range of health outcomes, including social determinants and risky health behaviours. In addition, subjective well-being, specifically life satisfaction is increasingly being recognized as playing an important role.(1-3) Shifting from health outcomes to a health system perspective, many ambulatory care sensitive conditions (ACSC) are preventable and result in high amounts of healthcare resources if left unmanaged.(4, 5) Hospitalizations for these conditions (e.g., diabetes) are regarded as avoidable due to the relationship of timely access to primary care preventing complications and acute episodes.(5-7) In many countries, hospitalizations for these conditions are used as an indicator to measure the effectiveness of the healthcare system. (8)

Positive affect (i.e. positive emotions, happiness), is the degree to which an individual experiences positive emotion (9), has been shown to be independently associated with reduced risk of coronary heart disease, even after adjustment for depressive symptoms. (10) Similarly, life satisfaction is associated with a reduced risk of various chronic conditions. (2, 11) Evidence from a recent prospective cohort study concluded lower life satisfaction was associated with a higher incidence of cancer, stroke, and type-2 diabetes (11) and others have shown its relationship with health behaviours. (12) Positive affect is distinct from life satisfaction in that it is an emotional response describing positive emotions or happiness, which can be transitory. This is conceptually distinct from the more stable and complex measure of being satisfied with life, which is based on an individual's self-judgments of several factors that they feel are valuable to their life.

Research on life satisfaction has also recently shown to impact future high-health care use.(13) Individuals with lower life satisfaction had three times the odds of being in the top 5% of healthcare resource utilization.(13) However, another important system indicator that is absent from the current life satisfaction literature is avoidable hospitalizations, such as those caused by ACSCs. Given the evidence around the interrelationships between emotional factors and chronic-disease self-management (14) and in particular how emotional and psychological distress can influence the ability of a patient to manage their chronic condition (15, 16), more research is needed that quantitatively measures the impact of subjective well-being on important healthcare system outcomes.

Upon a recent search, only eight studies were identified that fit the criteria of a similar exposure to life satisfaction and hospitalizations for one or more ACSCs as an outcome. Previous studies mostly focused on singular conditions, with small sample sizes, limited follow-up time and clinical or convenience-based samples (17, 18). Regarding the length of follow-up, these ranged from six months (19) to four years (20). Studies with shorter follow-up times can be limited because many of the conditions regarded as ACSCs are also chronic diseases (e.g., diabetes) require a longer follow-up time necessary to allow for outcomes to be observed. Furthermore, hospitalizations for ACSCs are a relatively rare event in Canada where people with an ACSC hospitalization constitutes only 0.4% of the population aged 12 to 74 (21), and therefore, the

1  
2  
3 limited sample sizes in previous studies may not be sufficient to observe an effect. We address  
4 these limitations by conducting the largest population-based cohort study to date. The low rate  
5 of ACSCs is typical of similar health systems in Europe, the UK and Australia.  
6  
7

8 The primary objective of this study was to determine if poor life satisfaction increased the risk of  
9 being hospitalized for an ACSC in a relatively healthy baseline cohort among an adult population  
10 using linked survey and complete hospitalization records. Our secondary objective was to  
11 determine if this association was stronger among those with lower socioeconomic status.  
12  
13

## 14 Methods

### 15 Participants

16 The study was a longitudinal population-based cohort study of adult Ontario participants of the  
17 Canadian Community Health Survey (CCHS) pooled across five cycles: Cycle 2.1 (2003-2004),  
18 Cycle 3.1 (2005-2006), Cycle (2007-2008), Cycle (2009-2010), and Cycle (2011-2012). The  
19 CCHS conducted surveys on a 2-year collection cycle (i.e., 2003, 2005) therefore no cycle  
20 existed for 2004 and 2006 and cycle naming conventions changed after 2005 to remove cycle  
21 numbers. The CCHS is a cross-sectional survey administered by Statistics Canada, representative  
22 of 98% of the Canadian population aged  $\geq 12$  years living in private dwellings with response  
23 rates  $>75\%$ . (22,23) The respondents in the CCHS survey consented to participate in the survey  
24 and have their data linked to administrative data for research purposes. Where the CCHS is a  
25 cross-sectional survey, the longitudinal aspect of this study is achieved by retrieving the outcome  
26 measure from hospital administrative databases. The data was linked to population-based health  
27 administrative data held at ICES. These data sources capture all hospitalization records for every  
28 person living in the province of Ontario covered under the single-payer health system.  
29  
30  
31  
32  
33  
34

35 Eighty percent of the CCHS survey respondents consented to have their data linked to the single-  
36 payer health insurance data, referred to as the Ontario Health Insurance Plan (OHIP), which  
37 captures all related healthcare encounters. All survey respondents were linked to Ontario's  
38 population registry, the Registered Persons Database (RPDB), which captures core demographic  
39 and clinical information as well as death, in addition to the Discharge Abstract Database (DAD).  
40 The analytic sample included adults (aged 18 to 74) who reported on life satisfaction and did not  
41 have an ACSC-related hospitalization in the two years before their CCHS interview date (**Figure**  
42 **1**).  
43  
44  
45

### 46 Measures

47 Self-reported life satisfaction, the primary exposure variable, is captured from CCHS. The  
48 question that respondents answered regarding life satisfaction was, "How satisfied are you with  
49 your life in general?" With response options being: *very satisfied*, *satisfied*, *neither satisfied nor*  
50 *dissatisfied*, *dissatisfied*, or *very dissatisfied*. Due to small sample sizes within each category, we  
51 collapsed the categories of dissatisfied and very dissatisfied. Furthermore, we did not  
52 hypothesize significant conceptual differences between these two categories related to  
53 hospitalizations for ACSCs.  
54  
55  
56  
57  
58  
59

1  
2  
3 The primary outcome variable was hospitalizations for an ACSC, which we used as a composite  
4 outcome. The ACSCs that we chose to report on are grand mal status and other epileptic  
5 convulsions, chronic obstructive pulmonary disease, asthma, diabetes, heart failure and  
6 pulmonary edema, hypertension, and angina. These conditions are in accordance with the  
7 Canadian Institute for Health Information's (CIHI) methodology (24) and this composite  
8 outcome is an established health system indicator in Canada. The CIHI indicator applies only to  
9 individuals under the age of 75 as the hospitalizations in those above the age of 75 are not as  
10 clearly avoidable through timely and effective primary care. See **Supplement Table 1** for the list  
11 of included conditions and their corresponding ICD-10 codes.  
12  
13  
14  
15

16 Aggregate diagnosis groups (ADGs<sup>®</sup>)(25) were captured through administrative data as a  
17 summary measure of comorbidity and are based on the Johns Hopkins ACG<sup>®</sup> System, which is a  
18 person-focused, diagnosis-based method of categorizing subjects' illnesses [22]. ADGs have  
19 previously been used and validated as a reliable method of comorbidity adjustment in the Ontario  
20 population (26), and we used Version 10.0.1 in this analysis. Additionally, we used the Ontario  
21 Marginalization Index (ON-Marg) as a measure of socioeconomic status. The ON-Marg is a  
22 census-based, geographically derived index that was used to calculate area-level material  
23 deprivation.(27) Specifically, the material deprivation dimension measures the proportion of the  
24 population within a geographic region that is low income, without high school diploma, lone  
25 parent families, receiving government transfer payments, unemployed, and living in dwellings in  
26 need of repair. All other covariates were captured through self-report from the CCHS interview  
27 questions.  
28  
29  
30  
31

### 32 CCHS Variables

34 Household income quintile categorizes individuals based on their total household income in  
35 addition to the number of individuals living in the household. Individuals are then ranked from  
36 the lowest levels of household income (*Q1*) to the highest (*Q5*). Body Mass Index (BMI) was  
37 categorized into five categories ranging from "underweight" (BMI less than 18.5) to "severely  
38 obese" (BMI greater than 34.9). Physical activity was based on an individual's self-reported  
39 daily energy expenditure and further categorized into three levels: active, moderately active and  
40 inactive. Smoking status measured an individuals' self-reported past and present smoking habits  
41 by considering both the total amount of cigarettes smoked and the type of smoker they are (e.g.,  
42 daily vs. occasional). This variable was categorized into three levels: current smoker, former  
43 smoker, never smoker. Alcohol consumption was based on the participant's sex and the quantity  
44 of alcohol consumed each day. This variable was then categorized into four levels: heavy  
45 drinker, moderate drinker, light drinker and never drinker. Mood disease was captured through  
46 the CCHS interview question "have you ever been diagnosed by a health professional for  
47 depression, bipolar disorder, mania or dysthymia?" This variable was used to control for  
48 depression. Anxiety disorder, which was captured through the question: "have you ever been  
49 diagnosed by a health professional for an anxiety disorder such as a phobia, obsessive-  
50 compulsive disorder, or panic disorder?" Education level is a derived variable which indicates  
51  
52  
53  
54  
55  
56  
57  
58  
59  
60

1  
2  
3 the highest level of education acquired by the participant; this variable was explored as a  
4 potential indicator for SES.  
5

### 6 7 **Statistical Analysis**

8 We calculated the distribution of demographic, socioeconomic, health status and behaviour  
9 characteristics according to ACSCs and life satisfaction. Excluding those with an ACSC in the  
10 year prior allowed for the investigation of the upstream determinants (i.e. the factors associated  
11 with future development of an ACSC hospitalization in a cohort who were without a recent  
12 hospitalization for one of these conditions).  
13  
14

15 Cox proportional hazards models were used to estimate the hazards associated with baseline life  
16 satisfaction on the risk of being hospitalized for an ACSC. Time is defined as survey date until  
17 disease or censoring for study endpoint (max follow up until March 31, 2017) or death. The  
18 models were used to quantify the association between life satisfaction and the hazard of being  
19 hospitalized for an ACSC using “very satisfied” as the referent category. We calculated  
20 unadjusted, age-sex-adjusted, minimally adjusted and fully adjusted models to transparently  
21 demonstrate the impact of adjustment. The minimally adjusted model controlled for age, sex and  
22 household income while the fully adjusted model included age, sex, household income, smoking  
23 status, alcohol consumption, physical activity and BMI. In order to show the fully adjusted  
24 results were not meaningfully affected by over comorbidity, mood disorders and anxiety, we ran  
25 three additional models, which controlled for ADG score, mood disease, and anxiety separately.  
26 We ran these models separately in order to quantify their impact on the life satisfaction hazards  
27 in the fully adjusted model that controlled for sociodemographic and behavioural factors that we  
28 conceptualized as confounders (i.e. age, sex, household income, smoking status, alcohol  
29 consumption, physical activity and BMI).  
30  
31  
32  
33  
34  
35

36 To evaluate the proportional hazards assumption for life satisfaction, a plot of log(-log  
37 (survival)) versus the logarithm of follow-up time in days was run. With this method, the  
38 proportional hazards assumption is met if the plot produces parallel curves.  
39  
40

41 A joint-effects model was used to test if the relationship between life satisfaction and avoidable  
42 hospitalizations varied by SES. A joint-effects variable, which contains each combination of life  
43 satisfaction and household income, was included in the model while controlling for age, sex,  
44 smoking status, alcohol consumption, physical activity and BMI.  
45  
46

47 We ran sensitivity analyses by re-running the fully adjusted model with a consistent survival  
48 time of five years. Additionally, models for individuals who did not have an event in the first two  
49 years of the study were run to control for undocumented comorbidity. The subdistribution  
50 hazards model, which was initially developed by Fine and Gray (28), was run to test the  
51 possibility of death behaving as a competing risk.  
52  
53  
54  
55  
56  
57  
58  
59  
60

1  
2  
3 Survey and bootstrap sampling weights provided by Statistics Canada were applied in all  
4 descriptive and survival regression analyses to account for the complex survey design and to  
5 maintain population representativeness. (29) The bootstrap sampling weights were applied using  
6 balanced repeated replication, in order to properly calculate confidence intervals. Additionally,  
7 this project received ethics approval from the Health Sciences Research Ethics Board at the  
8 University of Toronto (Ref # 36123, 15 August 2018). Finally, all statistical analyses were  
9 performed in 2018 and 2019 using SAS version 9.4.  
10  
11  
12

### 13 Patient Involvement

14 Patients were not involved in the development of the research question, outcome measures,  
15 recruitment, design or the implementation of the study objectives. Furthermore, no patients were  
16 consulted on the interpretation of results, and there are no plans to disseminate the results of this  
17 study to the relevant participants or their communities.  
18  
19  
20

### 21 Results

22 After combining the five cycles of data linked to the Registered Persons Database and excluding  
23 those less than 18, older than 74, in multiple survey cycles, missing life satisfaction, had an  
24 ACSC related hospitalization in the two years before the start of the study resulted in 129,467  
25 individuals remaining. Those who experienced an ACSC-related hospitalization two years before  
26 their survey interview date were removed to examine the impact of life satisfaction on future  
27 hospitalizations for an ACSC and reduce the possibility of reverse causality (**Figure 1**). In the  
28 case of people in multiple survey cycles (n=1,589), we used the earliest survey response. Each  
29 respondent was followed for a maximum of 14 years or until the study end date, after which we  
30 determined that 3,037 individuals had experienced an ACSC-related hospitalization.  
31  
32  
33  
34

35 The distribution of baseline characteristics according to life satisfaction categories are shown in  
36 Table 1. Those with the lowest levels of life satisfaction (very dissatisfied) compared to the  
37 highest level of life satisfaction (very satisfied) had a lower proportion in the youngest (18-34  
38 years) age group (14.5% versus 30.6%), more likely to have less than secondary education  
39 (12.9% versus 4.62%), had a greater proportion in the lowest income quintile (38.9% versus  
40 9.5%), higher comorbidity levels (ADG score 10.1 versus 3.42), and higher disease-related risk  
41 factors such as smoking (43.8% versus 17.4%) and physical inactivity (70.6% versus 40.7%).  
42  
43  
44  
45 (**Table 1**).

46 The distribution of all the cohort characteristics according to ACSC status are show in Table 2.  
47 Those that had an ACSC during the follow-up compared to those that did not were more likely to  
48 be in the older age group (65-74 years) (21.6% versus 9.55%), more likely to have less than  
49 secondary education (19.2% versus 6.01%), had a greater proportion in the lowest income  
50 quintile (20.7% versus 13.5%), higher comorbidity levels (ADG score 11.8 versus 3.86), and  
51 higher disease-related risk factors such as smoking (36.7% versus 21.5%) and physical inactivity  
52 (61.4% versus 48.2%). (**Table 2**).  
53  
54  
55  
56  
57  
58  
59  
60



1  
2  
3 Life satisfaction had a strong unadjusted relationship with hospitalization for ACSC (unadjusted  
4 Kaplan Meir curves are shown in Supplement Figure 1). **Table 3** presents the unadjusted and  
5 adjusted hazard ratios for the relationship between life satisfaction and ACSC-related  
6 hospitalizations, which include models that adjusted for age and sex, and then further adjusted  
7 for socioeconomic and lifestyle factors. Although full adjustment does reduce the size of the  
8 effect, the hazard ratio of an individual with the lowest levels of life satisfaction (dissatisfied and  
9 very dissatisfied combined) compared to those who were very satisfied is 2.71 (95% confidence  
10 interval 1.87 to 3.93). The observed relationship follows a dose-response pattern, or in other  
11 words, the hazard ratios increase in size for each decreasing level of life satisfaction. For  
12 example, in the fully adjusted model, the hazard ratio for the middle life satisfaction category  
13 (neither satisfied nor dissatisfied) was 1.71 (95% confidence interval 1.36 to 2.14) while the  
14 satisfied category produced a hazard ratio of 1.32 (95% confidence interval 1.15 to 1.50).  
15 Furthermore, the additional analyses (**Table 4**) that controlled for ADG score, mood disease and  
16 anxiety separately did not substantially reduce the observed effect sizes with the added  
17 adjustment of ADG score having the largest impact (hazard ratio of 2.42, 95% confidence  
18 interval of 1.68 to 3.51). Finally, as the plot of survival by time according to life satisfaction  
19 produced parallel curves, the proportional hazards assumption was satisfied.

20  
21  
22  
23  
24  
25  
26 Regarding the joint effects model (**Table 5**), individuals who identified as having both low life  
27 satisfaction and low household income produced a fully adjusted hazard ratio of 3.80 (95%  
28 confidence interval 2.13 to 6.73). Therefore, in comparison to the fully adjusted model presented  
29 in Table 3 (hazard ratio of 2.71), poor SES individuals are at an increased risk of being  
30 hospitalized when reporting low life satisfaction.  
31  
32  
33

34 A range of sensitivity analyses were conducted to test the robustness of the study findings. Both  
35 the five-year survival model (where everyone was limited to a 5-year follow-up) and the model  
36 which excluded individuals who had an event within the first two years did not change the effect  
37 sizes to a significant degree. The hazard ratios for the lowest levels of life satisfaction compared  
38 to those who were very satisfied were 2.74 and 2.77, respectively (**Supplement Table 2**). In the  
39 competing risk analysis (**Supplement Table 3**), the unadjusted hazard ratios produced in the  
40 subdistribution hazard model were similar to those produced in the final model (4.38 vs 4.51  
41 respectively).  
42  
43  
44

## 45 Discussion

46 This study focuses on how life satisfaction can impact health system indicators such as avoidable  
47 hospitalizations in a general population cohort without a recent ACSC. We investigated this  
48 relationship and accounted for a wide variety of sociodemographic and behavioral risk factors.  
49 We saw a robust association that poor life satisfaction had a strong independent relationship with  
50 future ACSC hospitalizations. The lowest levels of life satisfaction (dissatisfied and very  
51 dissatisfied) being associated with almost a three times higher hazard of an avoidable  
52  
53  
54  
55  
56  
57  
58  
59  
60

1  
2  
3 hospitalization compared to those who were very satisfied after accounting for several  
4 sociodemographic and behavioural confounders.  
5

6  
7 Previous studies have linked life satisfaction and related exposures (e.g. positive affect or  
8 happiness) to health outcomes such as stroke (11) and heart disease. (10) Life satisfaction has  
9 also been shown to be associated with a wide variety of health behaviours. (30, 31) For instance,  
10 one study found that those who exercised more were generally happier.(32) Furthermore, life  
11 satisfaction has also been shown to be experienced differently across categories of  
12 socioeconomic status.(33) Due to the detailed survey variables available from the survey data  
13 and the linkage of these data to complete hospitalization outcomes from health administrative  
14 databases, were able to adjust for these health behaviours and measures of socioeconomic status  
15 in our analysis as well as examine how the influence of life satisfaction is strengthen or lessened  
16 across levels of socioeconomic status.  
17  
18  
19

20  
21 This study addresses an important gap in the literature by providing a robust population sample  
22 size and examining how life satisfaction related to a meaningful health system outcome. There  
23 are few studies that addresses life satisfaction or other forms of subjective well being and their  
24 relationship to hospitalizations for ACSCs. Furthermore, the existing research is limited by small  
25 sample sizes and limited follow-up times to capture the relatively rare ACSC event. This study  
26 also has more direct implications for the health system given ACSCs are defined as conditions  
27 for which hospitalizations should be prevented, given timely and effective access to primary  
28 care. (7) Considering the preventable nature of these conditions, hospitalizations for ACSCs are  
29 an ineffective use of healthcare resources and insight into the risk factors for these conditions can  
30 help improve health system functioning.  
31  
32  
33

34  
35 Unlike previous studies, we measured baseline life satisfaction on a sample who did not have an  
36 ACSC hospitalization in the two years prior while also presenting analyses that additionally  
37 controlled for comorbidity. These aspects of the study help mitigate the possibility that that poor  
38 life satisfaction could have been the result of the bidirectional relationship between poor health  
39 and life satisfaction. A possible explanation for the observed results is that individuals who  
40 experience poor life satisfaction tend to have higher rates of depression, given its observed  
41 relationship with poor health outcomes. (34, 35) To address this, we further adjusted for mood  
42 disease and found that this has little effect on attenuated the observed association. The survey did  
43 not include continuous measures that could capture sub-threshold levels or undiagnosed anxiety  
44 or depression.  
45  
46  
47  
48

### 49 Limitations

50 We acknowledge that this study has some limitations and interpretive cautions. First, this study  
51 was an observational study and although we controlled for several potential confounders and  
52 excluded those with a recent history of ACSC at baseline through linkage, we cannot rule out the  
53 possibility of unmeasured or residual confounding. We note however that the effect sizes are  
54 large, and this study did control for many more confounders than previous studies through a  
55  
56  
57  
58  
59  
60

1  
2  
3 combination of survey data in addition to health administrative variables to capture comorbidity.  
4 Second, we measured life satisfaction at one point in time (survey interview date). Research on  
5 life satisfaction has shown it to be consistent over time (36); however, it is possible that life  
6 satisfaction could have changed during the study period. Therefore, we only capture the effect  
7 from that initial time point and cannot account for the influence of changes in life satisfaction  
8 that happen following the baseline assessment. Furthermore, there are other instruments that can  
9 be used to assess life satisfaction that were not available in this survey. Finally, life satisfaction  
10 is a subjective measure. It has been shown to be an accurate and robust measure, it is still up to  
11 the individuals to judge and reflect on their life satisfaction. This means that its meaning can  
12 differ based on the individual, which can result in variation in the exposure. Despite these  
13 limitations, this study has still provided an essential contribution to the literature by being one of  
14 the first assessments of life satisfaction on avoidable hospitalization that utilizes a longitudinal  
15 population-based study design while measuring this exposure before the hospitalization outcome.  
16  
17  
18  
19  
20

### 21 Mechanisms

22 This study did not directly address mechanisms by which life satisfaction can influence  
23 avoidable hospitalizations; however, these have been studied by others. Out of the existing  
24 literature, there are three main mechanisms that could help explain the observed relationship:  
25 behavioural, health service use, and biological. Subjective well-being has been shown to impact  
26 a variety of health behaviours, such as increased physical activity (37-40) and reduced smoking  
27 habits (40). However, many of these studies lacked proper adjustment of confounding variables  
28 such as SES and psychological distress.(40) Regarding health service use, a study from 2014  
29 found that participants who were identified as having a greater purpose in life were more likely  
30 to receive preventative health services such as mammograms or colonoscopies.(41) What  
31 remains to be seen regarding this mechanism is whether the use of these services reflects access  
32 to primary care, or the decisions made by the individuals themselves to seek these services.  
33 However, a recent population-based cohort study noted how hospitalizations for ACSCs could  
34 not be explained by a lack of access to primary care (42), and therefore it is possible that this  
35 phenomenon is a result of individual decisions that are influenced by their satisfaction with life.  
36 Finally, biological mechanisms could also play a contributing role. A recent meta-analysis noted  
37 how individuals who were identified as having greater psychological well-being experienced  
38 favourable lipid profiles.(43) However, these associations were largely mitigated once  
39 behavioural characteristics were taken into account.(43) Our study did not compare the extent to  
40 which life satisfaction is associated with ACSC compared to other types of hospitalization. This  
41 was out of scope for this current study, but in a future analysis could help provide insight into  
42 mechanisms that are specific to preventable hospitalizations. Our study did not examine whether  
43 ACSC hospitalizations were reduced for Ontario hospitals, but instead focused on individual's  
44 risk based on their life satisfaction measure. In future studies, analyses at the system level (i.e.  
45 ACSC hospitalizations in Ontario hospitals) would supplement these findings to better  
46 understand the health system impact.  
47  
48  
49  
50  
51  
52  
53  
54  
55  
56  
57  
58  
59  
60

## Conclusions

This study demonstrates that life satisfaction is associated with hospitalizations for ACSCs, even after controlling for socioeconomic characteristics, health behaviours, comorbidities and mental health factors. Furthermore, more socioeconomically deprived individuals were shown to be at an increased risk. While governments plan to improve the sustainability and functioning of their health systems, there is a greater need to understand social supports that can improve life satisfaction costly and preventable conditions such as ACSCs. The findings of this study suggest that broader considerations, such as life satisfaction, can potentially influence avoidable hospitalizations, a burden to individuals and healthcare systems. Further research in this area may contribute to the development of wide-ranging approaches to target a potentially avoidable burden on the health system.

## Tables

Table 1: Weighted<sup>a</sup> distributions of baseline characteristics across five levels of life satisfaction (N= 129,467)

|                                          | Very Satisfied (N= 49,502) | Satisfied (N= 67,978) | Neither Satisfied or Dissatisfied (N= 7,312) | Dissatisfied (N= 3,779) | Very Dissatisfied (N= 896) | Unweighted Ns (N= 129,467) |
|------------------------------------------|----------------------------|-----------------------|----------------------------------------------|-------------------------|----------------------------|----------------------------|
| <b>ACSC Hospitalization</b>              |                            |                       |                                              |                         |                            |                            |
| Yes                                      | 1.12                       | 1.61                  | 2.51                                         | 4.81                    | 5.39                       | 3,037                      |
| No                                       | 98.88                      | 98.39                 | 97.49                                        | 95.19                   | 94.61                      | 126,430                    |
| <b>Sex</b>                               |                            |                       |                                              |                         |                            |                            |
| Male                                     | 47.5                       | 50.53                 | 47.34                                        | 49.93                   | 47.32                      | 59,292                     |
| Female                                   | 52.5                       | 49.47                 | 52.66                                        | 50.07                   | 52.68                      | 70,175                     |
| <b>Age group</b>                         |                            |                       |                                              |                         |                            |                            |
| 18-34                                    | 30.64                      | 33.09                 | 30.78                                        | 23.91                   | 14.53                      | 35,255                     |
| 35-49                                    | 31.9                       | 33.21                 | 31.14                                        | 36.12                   | 33.6                       | 35,063                     |
| 50-64                                    | 26.31                      | 24.97                 | 27.37                                        | 31.04                   | 41.39                      | 38,662                     |
| 65-74                                    | 11.15                      | 8.72                  | 10.7                                         | 8.93                    | 10.49                      | 20,487                     |
| <b>BMI</b>                               |                            |                       |                                              |                         |                            |                            |
| Underweight < 18.5                       | 2.22                       | 2.79                  | 3.79                                         | 4.08                    | 3.35                       | 2,674                      |
| Normal weight, 18.5-24.9                 | 46.83                      | 46.02                 | 43.31                                        | 39.31                   | 37.18                      | 53,327                     |
| Overweight, 25-29.9                      | 35.48                      | 33.55                 | 32.37                                        | 31.78                   | 32.34                      | 43,915                     |
| Moderately obese, 30-34.9                | 11.72                      | 12.44                 | 13.15                                        | 15.62                   | 16.57                      | 17,840                     |
| Severely obese, > 34.9                   | 3.75                       | 5.2                   | 7.38                                         | 9.22                    | 10.57                      | 7,815                      |
| <b>ADG<sup>®</sup> Score<sup>b</sup></b> |                            |                       |                                              |                         |                            |                            |
| Mean (SD)                                | 3.42 (0.06)                | 3.95 (0.22)           | 5.76 (0.80)                                  | 7.29 (1.13)             | 10.13 (0.709)              | 129,467                    |
| <b>Physical Activity Status</b>          |                            |                       |                                              |                         |                            |                            |
| Active                                   | 32.24                      | 24.09                 | 18.2                                         | 16.94                   | 14.95                      | 35,482                     |
| Moderate                                 | 27.08                      | 24.73                 | 19.25                                        | 18.8                    | 14.5                       | 33,791                     |
| Inactive                                 | 40.65                      | 51.14                 | 62.22                                        | 64.2                    | 70.55                      | 60,149                     |
| <b>On-Marg Deprivation</b>               |                            |                       |                                              |                         |                            |                            |
| 1 (Least Marginalized)                   | 24.86                      | 20.76                 | 12.81                                        | 15.84                   | 15.43                      | 23,405                     |

|                                                                                                                                                                                                                                       |       |       |       |       |       |         |
|---------------------------------------------------------------------------------------------------------------------------------------------------------------------------------------------------------------------------------------|-------|-------|-------|-------|-------|---------|
| 2                                                                                                                                                                                                                                     | 22.03 | 20.22 | 18.21 | 15.72 | 13.13 | 25,427  |
| 3                                                                                                                                                                                                                                     | 19.84 | 19.72 | 18.93 | 19.23 | 17.55 | 26,391  |
| 4                                                                                                                                                                                                                                     | 16.74 | 18.99 | 22.71 | 20.01 | 21.85 | 26,386  |
| 5 (Most Marginalized)                                                                                                                                                                                                                 | 15.57 | 19.29 | 26.2  | 28.04 | 31.52 | 26,073  |
| <i>Education Level</i>                                                                                                                                                                                                                |       |       |       |       |       |         |
| < secondary                                                                                                                                                                                                                           | 4.62  | 6.52  | 9.87  | 12.4  | 12.91 | 12,302  |
| Secondary grad                                                                                                                                                                                                                        | 10.79 | 12.25 | 13.65 | 12.78 | 16.24 | 18,047  |
| > secondary                                                                                                                                                                                                                           | 79.93 | 75.6  | 69.26 | 68.55 | 61.28 | 94,084  |
| Unknown                                                                                                                                                                                                                               | 4.66  | 5.63  | 7.22  | 6.28  | 9.57  | 5,034   |
| <i>Alcohol Consumption</i>                                                                                                                                                                                                            |       |       |       |       |       |         |
| Heavy Drinker                                                                                                                                                                                                                         | 7.94  | 8.62  | 8.08  | 9.11  | 11.6  | 11,502  |
| Moderate Drinker                                                                                                                                                                                                                      | 24.62 | 20.19 | 15.43 | 12.57 | 7.58  | 17,934  |
| Light Drinker                                                                                                                                                                                                                         | 15.37 | 13.61 | 11.42 | 9.26  | 7.44  | 28,413  |
| Never Drinker                                                                                                                                                                                                                         | 50.79 | 56.33 | 63.66 | 67.55 | 71.93 | 69,785  |
| <i>Smoking Status</i>                                                                                                                                                                                                                 |       |       |       |       |       |         |
| Current Smoker                                                                                                                                                                                                                        | 17.38 | 22.71 | 31.65 | 36.52 | 43.75 | 30,875  |
| Former Smoker                                                                                                                                                                                                                         | 22.92 | 20.53 | 17.48 | 19.76 | 19.43 | 32,623  |
| Never Smoked                                                                                                                                                                                                                          | 56.06 | 53.48 | 48.15 | 40.86 | 34.91 | 61,357  |
| <i>Immigrant Status</i>                                                                                                                                                                                                               |       |       |       |       |       |         |
| Yes                                                                                                                                                                                                                                   | 26.22 | 33.84 | 40.73 | 36.21 | 29.25 | 25,228  |
| No                                                                                                                                                                                                                                    | 72.5  | 64.24 | 57.2  | 61.64 | 67.89 | 102,911 |
| <i>Household Income Quintile</i>                                                                                                                                                                                                      |       |       |       |       |       |         |
| Q1 (Lowest Income)                                                                                                                                                                                                                    | 9.5   | 14.16 | 23.52 | 32.29 | 38.88 | 17,369  |
| Q2                                                                                                                                                                                                                                    | 12.19 | 15.72 | 18.68 | 16.97 | 15.92 | 18,687  |
| Q3                                                                                                                                                                                                                                    | 16.34 | 17.68 | 16.93 | 15.25 | 15.41 | 24,063  |
| Q4                                                                                                                                                                                                                                    | 22.29 | 21.61 | 16.05 | 13.11 | 12.73 | 29,029  |
| Q5 (Highest Income)                                                                                                                                                                                                                   | 30.74 | 20.71 | 12.36 | 11.18 | 7.92  | 31,515  |
| Unknown                                                                                                                                                                                                                               | 8.94  | 10.12 | 12.47 | 11.2  | 9.13  | 8,804   |
| <p><sup>a</sup> Weighted through surveysampling weights provided by Statistics Canada.</p> <p><sup>b</sup> ADG<sup>®</sup> Score is a weighted score based on an individual's ADGs. This method has been validated elsewhere.(26)</p> |       |       |       |       |       |         |

Table 2: Weighted<sup>a</sup> distributions of baseline characteristics according to hospitalization for an ACSC (N= 129,467)

|                                          | ACSC<br>Hospitalization<br>Yes (N= 3,037) | ACSC<br>Hospitalization<br>No (N=<br>126,430) | Unweighted<br>N's |  |
|------------------------------------------|-------------------------------------------|-----------------------------------------------|-------------------|--|
| <b>Sex</b>                               |                                           |                                               |                   |  |
| Male                                     | 56.12                                     | 49.09                                         | 59,292            |  |
| Female                                   | 43.88                                     | 50.91                                         | 70,175            |  |
| <b>Age group</b>                         |                                           |                                               |                   |  |
| 18-34                                    | 9.35                                      | 32.07                                         | 35,255            |  |
| 35-49                                    | 20.5                                      | 32.89                                         | 35,063            |  |
| 50-64                                    | 48.6                                      | 25.49                                         | 38,662            |  |
| 65-74                                    | 21.56                                     | 9.55                                          | 20,487            |  |
| <b>BMI</b>                               |                                           |                                               |                   |  |
| Underweight <18.5                        | 2.19                                      | 2.68                                          | 2,674             |  |
| Normal Weight, 18.5 –<br>24.9            | 29.19                                     | 46.2                                          | 53,327            |  |
| Overweight, 25-29.9                      | 33.96                                     | 34.13                                         | 43,915            |  |
| Moderately obese, 30-<br>34.9            | 21.39                                     | 12.18                                         | 17,840            |  |
| Severely obese, >34.9                    | 13.27                                     | 4.8                                           | 7,815             |  |
| <b>ADG<sup>®</sup> Score<sup>b</sup></b> |                                           |                                               |                   |  |
| Mean (SD)                                | 11.8 (0.39)                               | 3.86 (0.05)                                   | 129,467           |  |
| <b>Physical Activity Status</b>          |                                           |                                               |                   |  |
| Active                                   | 17.33                                     | 26.64                                         | 35,482            |  |
| Moderate                                 | 21.27                                     | 25.12                                         | 33,791            |  |
| Inactive                                 | 61.41                                     | 48.2                                          | 60,149            |  |
| <b>On-Marg Deprivation</b>               |                                           |                                               |                   |  |
| (Least Deprived) 1                       | 14.91                                     | 21.74                                         | 23,405            |  |
| 2                                        | 19.67                                     | 20.62                                         | 25,427            |  |
| 3                                        | 16.62                                     | 19.74                                         | 26,391            |  |
| (Most Deprived) 4                        | 21.42                                     | 18.38                                         | 26,386            |  |
| <b>Education Level</b>                   |                                           |                                               |                   |  |
| Less than secondary                      | 19.16                                     | 6.01                                          | 12,302            |  |
| Secondary graduate                       | 15.18                                     | 11.78                                         | 18,047            |  |
| More than secondary                      | 60.1                                      | 76.81                                         | 94,084            |  |
| Unknown                                  | 5.57                                      | 5.4                                           | 5,034             |  |
| <b>Alcohol Consumption</b>               |                                           |                                               |                   |  |
| Heavy Drinker                            | 6.95                                      | 8.39                                          | 11,502            |  |

|                                                                                                                                                                                                                                        |       |       |         |  |
|----------------------------------------------------------------------------------------------------------------------------------------------------------------------------------------------------------------------------------------|-------|-------|---------|--|
| Moderate Drinker                                                                                                                                                                                                                       | 16.37 | 21.34 | 17,934  |  |
| Light Drinker                                                                                                                                                                                                                          | 9.67  | 14.05 | 28,413  |  |
| Never Drinker                                                                                                                                                                                                                          | 65.23 | 54.95 | 69,785  |  |
| <i>Smoking Status</i>                                                                                                                                                                                                                  |       |       |         |  |
| Current Smoker                                                                                                                                                                                                                         | 36.7  | 21.53 | 30,875  |  |
| Former Smoker                                                                                                                                                                                                                          | 29.26 | 21.07 | 32,623  |  |
| Never Smoked                                                                                                                                                                                                                           | 31.09 | 54.04 | 61,357  |  |
| <i>Immigrant Status</i>                                                                                                                                                                                                                |       |       |         |  |
| Yes                                                                                                                                                                                                                                    | 25.03 | 31.59 | 25,228  |  |
| No                                                                                                                                                                                                                                     | 72.45 | 66.71 | 102,911 |  |
| <i>Household Income</i>                                                                                                                                                                                                                |       |       |         |  |
| Q1 (Lowest Income)                                                                                                                                                                                                                     | 20.72 | 13.51 | 17,369  |  |
| Q2                                                                                                                                                                                                                                     | 16.09 | 14.61 | 18,687  |  |
| Q3                                                                                                                                                                                                                                     | 16.56 | 17.07 | 24,063  |  |
| Q4                                                                                                                                                                                                                                     | 17.57 | 21.31 | 29,029  |  |
| Q5 (Highest Income)                                                                                                                                                                                                                    | 18.58 | 23.65 | 31,515  |  |
| Unknown                                                                                                                                                                                                                                | 10.48 | 9.84  | 8,804   |  |
| <p><sup>a</sup> Weighted through survey sampling weights provided by Statistics Canada.</p> <p><sup>b</sup> ADG<sup>®</sup> Score is a weighted score based on an individual's ADGs. This method has been validated elsewhere.(26)</p> |       |       |         |  |



Table 3: Multivariable AHRs and 95% CIs From Proportional Hazards Regression (N= 129,467)

| Life Satisfaction                  | Unadjusted            |            | Age-Sex Adjusted      |            | Minimally Adjusted <sup>a</sup> |            | Fully Adjusted <sup>b</sup> |            |
|------------------------------------|-----------------------|------------|-----------------------|------------|---------------------------------|------------|-----------------------------|------------|
|                                    | HR (95% CI)           | p-value    | HR (95% CI)           | p-value    | HR (95% CI)                     | p-value    | HR (95% CI)                 | p-value    |
| Very Satisfied                     | (ref)                 | (ref)      | (ref)                 | (ref)      | (ref)                           | (ref)      | (ref)                       | (ref)      |
| Satisfied                          | 1.44<br>(1.27 - 1.64) | P < 0.0001 | 1.56<br>(1.37 - 1.77) | P < 0.0001 | 1.48<br>(1.30 - 1.69)           | P < 0.0001 | 1.32<br>(1.15 - 1.50)       | P < 0.0001 |
| Neither Satisfied or Dissatisfied  | 2.22<br>(1.79 - 2.76) | P < 0.0001 | 2.37<br>(1.91 - 2.95) | P < 0.0001 | 2.11<br>(1.69 - 2.65)           | P < 0.0001 | 1.71<br>(1.36 - 2.14)       | P < 0.0001 |
| Dissatisfied and Very Dissatisfied | 4.51<br>(3.17 - 6.41) | P < 0.0001 | 4.48<br>(3.16 - 6.34) | P < 0.0001 | 3.79<br>(2.66 - 5.41)           | P < 0.0001 | 2.71<br>(1.87 - 3.93)       | P < 0.0001 |

HR – hazard ratio, CI – confidence interval

<sup>a</sup> Minimally adjusted models controlled for age, sex and household income

<sup>b</sup> Fully adjusted models controlled for age, sex, household income, physical activity, BMI, alcohol consumption and smoking status

1  
2  
3  
4  
5  
6  
7  
8  
9  
10  
11  
12  
13  
14  
15  
16  
17  
18  
19  
20  
21  
22  
23  
24  
25  
26  
27  
28  
29  
30  
31  
32  
33  
34  
35  
36  
37  
38  
39  
40  
41  
42  
43  
44  
45  
46  
47

Table 4: Multivariable AHRs<sup>a</sup> and 95% CIs From Proportional Hazards Regression After Additionally Adjusting for ADG<sup>®</sup> score, Mood Disease and Anxiety (N= 129,467)

|                                                                                                                                                                        | Fully Adjusted with ADG <sup>®</sup> Score |            | Fully Adjusted with Mood Disease |            | Fully Adjusted with Anxiety |            |
|------------------------------------------------------------------------------------------------------------------------------------------------------------------------|--------------------------------------------|------------|----------------------------------|------------|-----------------------------|------------|
|                                                                                                                                                                        | HR (95% CI)                                | p-value    | HR (95% CI)                      | p-value    | HR (95% CI)                 | p-value    |
| <i>Life Satisfaction</i>                                                                                                                                               |                                            |            |                                  |            |                             |            |
| Very Satisfied                                                                                                                                                         | (ref)                                      | (ref)      | (ref)                            | (ref)      | (ref)                       | (ref)      |
| Satisfied                                                                                                                                                              | 1.28 (1.12 - 1.46)                         | 0.0004     | 1.30 (1.13 - 1.50)               | 0.0002     | 1.31 (1.14 - 1.49)          | 0.0001     |
| Neither Satisfied or Dissatisfied                                                                                                                                      | 1.56 (1.25 - 1.96)                         | 0.0001     | 1.62 (1.29 - 2.05)               | P < 0.0001 | 1.65 (1.31 - 2.08)          | P < 0.0001 |
| Dissatisfied and Very Dissatisfied                                                                                                                                     | 2.42 (1.68 - 3.51)                         | P < 0.0001 | 2.45 (1.68 - 3.55)               | P < 0.0001 | 2.52 (1.76 - 3.61)          | P < 0.0001 |
| HR – hazard ratio, CI – confidence interval                                                                                                                            |                                            |            |                                  |            |                             |            |
| <sup>a</sup> Both models controlled for age, sex, household income, physical activity, BMI, alcohol consumption, smoking status in addition to the variable specified. |                                            |            |                                  |            |                             |            |

Table 5: Multivariable AHRs and 95% CIs From Joint Effects Models (N= 129,467)

| Joint Effects                                        | Unadjusted          |            | Fully Adjusted <sup>a</sup> |            |
|------------------------------------------------------|---------------------|------------|-----------------------------|------------|
|                                                      | HR (95% CI)         | p-value    | HR (95% CI)                 | p-value    |
| High Life Satisfaction and High Income               | 1.00                | (ref)      | 1.00                        | (ref)      |
| High Life Satisfaction and Middle Income             | 1.40 (1.18 – 1.65)  | P < 0.0001 | 1.18 (0.99 – 1.40)          | 0.0581     |
| High Life Satisfaction and Low Income                | 2.00 (1.66 – 2.42)  | P < 0.0001 | 1.63 (1.35 – 1.99)          | P < 0.0001 |
| Neither Satisfied Nor Dissatisfied and High Income   | 1.84 (1.16 – 2.93)  | 0.0099     | 1.55 (0.98 – 2.46)          | 0.0614     |
| Neither Satisfied Nor Dissatisfied and Middle Income | 2.46 (1.84 – 3.29)  | P < 0.0001 | 1.92 (1.42 – 2.60)          | P < 0.0001 |
| Neither Satisfied Nor Dissatisfied and Low Income    | 2.44 (1.7 – 3.53)   | P < 0.0001 | 1.68 (1.16 – 2.45)          | 0.0067     |
| Low Life Satisfaction and High Income                | 3.71 (1.08 – 12.78) | 0.0377     | 2.81 (0.80 – 9.91)          | 0.1068     |
| Low Life Satisfaction and Middle Income              | 3.67 (2.67 – 5.03)  | P < 0.0001 | 2.30 (1.66 – 3.18)          | P < 0.0001 |
| Low Life Satisfaction and Low Income                 | 6.95 (3.91 – 12.38) | P < 0.0001 | 3.80 (2.13 – 6.73)          | P < 0.0001 |

HR – hazard ratio, CI – confidence interval

<sup>a</sup> Fully adjusted models controlled for age, sex, physical activity, BMI, alcohol consumption, smoking status

1  
2  
3  
4  
5  
6  
7  
8  
9  
10  
**Contributors:** LCR and VG conceptualized the study, TW created the database and ED planned the analysis, analyzed the data, and drafted and revised the paper. LCR is the guarantor. All authors contributed to the manuscript and revised the draft paper. All have approved the final version for publication.

11  
12  
13  
**Funding:** This research was supported by a Canada Research Chair held by LCR (CRC-950-23072).

14  
15  
16  
17  
18  
**Disclaimer:** This study was supported by ICES, which is funded by an annual grant from the Ontario Ministry of Health and Long-Term Care. The opinions, results and conclusions reported in this paper are those of the authors and are independent from the funding sources.

19  
20  
21  
**Competing interests:** None declared

22  
23  
24  
25  
26  
27  
28  
29  
30  
31  
32  
33  
**Data sharing statement:** The data set from this study is held securely in coded form at ICES. While data sharing agreements prohibit ICES from making the data set publicly available, access may be granted to those who meet prespecified criteria for confidential access (available at [www.ices.on.ca/DAS](http://www.ices.on.ca/DAS)). The full data set creation plan and underlying analytic code are available from the authors upon request, understanding that the programs may rely upon coding templates or macros that are unique to ICES.

34  
35  
36  
37  
38  
39  
40  
41  
42  
43  
44  
45  
46  
47  
48  
49  
50  
51  
52  
53  
54  
55  
56  
57  
58  
59  
60  
Figure 1: Flow chart of study participants

## References

1. Zaninotto P, Wardle J, Steptoe A. Sustained enjoyment of life and mortality at older ages: analysis of the English Longitudinal Study of Ageing. *BMJ*. 2016;355:i6267.
2. Boehm JK, Trudel-Fitzgerald C, Kivimaki M, Kubzansky LD. The prospective association between positive psychological well-being and diabetes. *Health Psychol*. 2015;34(10):1013-21.
3. Sabatini F. The relationship between happiness and health: evidence from Italy. *Soc Sci Med*. 2014;114:178-87.
4. Carrière GM, Kumar MB, Sanmartin C. Hospitalization for ambulatory care sensitive conditions among urban Métis adults. *Health Rep*. 2017;28(12):3-11.
5. Caminal J, Starfield B, Sánchez E, Casanova C, Morales M. The role of primary care in preventing ambulatory care sensitive conditions. *Eur J Public Health*. 2004;14(3):246-51.
6. Brown AD, Goldacre MJ, Hicks N, Rourke JT, McMurtry RY, Brown JD, et al. Hospitalization for ambulatory care-sensitive conditions: a method for comparative access and quality studies using routinely collected statistics. *Can J Public Health*. 2001;92(2):155-9.
7. Billings J, Teicholz N. Uninsured patients in District of Columbia hospitals. *Health Aff (Millwood)*. 1990;9(4):158-65.
8. Magan P, Otero A, Alberquilla A, Ribera JM. Geographic variations in avoidable hospitalizations in the elderly, in a health system with universal coverage. *BMC Health Serv Res*. 2008;8:42.
9. Tomkins S. *Affect Imagery Consciousness: The Positive Affects*. New York: Springer Publishing Inc; 1963.
10. Davidson KW, Mostofsky E, Whang W. Don't worry, be happy: positive affect and reduced 10-year incident coronary heart disease: The Canadian Nova Scotia Health Survey. *European Heart Journal*. 2010;31(9):1065-70.
11. Feller S, Teucher B, Kaaks R, Boeing H, Vigl M. Life Satisfaction and Risk of Chronic Diseases in the European Prospective Investigation into Cancer and Nutrition (EPIC)-Germany Study. *PLOS ONE*. 2013;8(8):e73462.
12. Grant N, Wardle J, Steptoe A. The relationship between life satisfaction and health behavior: a cross-cultural analysis of young adults. *Int J Behav Med*. 2009;16(3):259-68.
13. Goel V, Rosella LC, Fu L, Alberga A. The Relationship Between Life Satisfaction and Healthcare Utilization: A Longitudinal Study. *Am J Prev Med*. 2018;55(2):142-50.
14. Audulv Å, Ghahari S, Kephart G, Warner G, Packer TL. The Taxonomy of Everyday Self-management Strategies (TEDSS): A framework derived from the literature and refined using empirical data. *Patient Education and Counseling*. 2019;102(2):367-75.
15. Schulman-Green D, Jaser SS, Park C, Whittemore R. A metasynthesis of factors affecting self-management of chronic illness. *Journal of advanced nursing*. 2016;72(7):1469-89.
16. Liddy C, Blazkho V, Mill K. Challenges of self-management when living with multiple chronic conditions: systematic review of the qualitative literature. *Canadian family physician Medecin de famille canadien*. 2014;60(12):1123-33.
17. Konstam V, Salem D, Pouleur H, Kostis J, Gorkin L, Shumaker S, et al. Baseline Quality of Life as a Predictor of Mortality and Hospitalization in 5,025 Patients With Congestive Heart Failure. *The American Journal of Cardiology*. 1996;78(8):890-5.

18. González-Freire B, Vázquez-Rodríguez I, Marcos-Velázquez P, de la Cuesta CG. Repression and coping styles in asthmatic patients. *J Clin Psychol Med Settings*. 2010;17(3):220-9.
19. Scheier MF, Matthews KA, Owens JF, Schulz R, Bridges MW, Magovern GJ, et al. Optimism and rehospitalization after coronary artery bypass graft surgery. *Arch Intern Med*. 1999;159(8):829-35.
20. Ronaldson A, Molloy GJ, Wikman A, Poole L, Kaski JC, Steptoe A. Optimism and recovery after acute coronary syndrome: a clinical cohort study. *Psychosom Med*. 2015;77(3):311-8.
21. Sanmartin CA, Khan S, Statistics Canada., Canadian Electronic Library (Firm). Hospitalizations for ambulatory care sensitive conditions (ACSC) the factors that matter. Ottawa, Ont.: Statistics Canada; 2011. Available from: [http://myaccess.library.utoronto.ca/login?url=http://books.scholarsportal.info/viewdoc.html?id=/ebooks/ebooks1/gibson\\_chrc/2011-10-10/1/10490988Available](http://myaccess.library.utoronto.ca/login?url=http://books.scholarsportal.info/viewdoc.html?id=/ebooks/ebooks1/gibson_chrc/2011-10-10/1/10490988Available) from: <http://publications.gc.ca/pub?id=389238&sl=0>.
22. Canadian Community Health Survey- Annual Component (CCHS) 2016 [updated 2016-01-11. Available from: <http://www23.statcan.gc.ca/imdb/p2SV.pl?Function=getSurvey&Id=259374>.
23. Statistics Canada. Canadian Community Health Survey, 2003: User Guide for the Public Use of Microdata File. Ottawa 2005.
24. Information ClfH. Indicator Library: Ambulatory Care Sensitive Conditions [Available from: <http://indicatorlibrary.cihi.ca/display/HSPIL/Ambulatory+Care+Sensitive+Conditions>.
25. Weiner JP, Abrams C, Bodycombe D. The Johns Hopkins ACG case-mix system version 6.0 release notes. Baltimore: Johns Hopkins Bloomberg School of Public Health. 2003.
26. Austin PC, van Walraven C, Wodchis WP, Newman A, Anderson GM. Using the Johns Hopkins Aggregated Diagnosis Groups (ADGs) to predict mortality in a general adult population cohort in Ontario, Canada. *Med Care*. 2011;49(10):932-9.
27. Matheson FI, Dunn JR, Smith KL, Moineddin R, Glazier RH. Development of the Canadian Marginalization Index: a new tool for the study of inequality. *Can J Public Health*. 2012;103(8 Suppl 2):S12-6.
28. Fine JP, Gray RJ. A Proportional Hazards Model for the Subdistribution of a Competing Risk. *Journal of the American Statistical Association*. 1999;94(446):496-509.
29. Kolenikov S. Resampling variance estimation for complex survey data. *Stata Journal*. 2010;10(2):165-99.
30. Lyubomirsky S, King L, Diener E. The benefits of frequent positive affect: does happiness lead to success? *Psychol Bull*. 2005;131(6):803-55.
31. Pressman SD, Cohen S. Does positive affect influence health? *Psychol Bull*. 2005;131(6):925-71.
32. Lathia N, Sandstrom GM, Mascolo C, Rentfrow PJ. Happier People Live More Active Lives: Using Smartphones to Link Happiness and Physical Activity. *PLoS One*. 2017;12(1):e0160589.
33. Barger SD, Donoho CJ, Wayment HA. The relative contributions of race/ethnicity, socioeconomic status, health, and social relationships to life satisfaction in the United States. *Quality of Life Research*. 2009;18(2):179-89.

- 1  
2  
3 34. Cuijpers P, de Graaf R, van Dorsselaer S. Minor depression: risk profiles, functional  
4 disability, health care use and risk of developing major depression. *Journal of Affective*  
5 *Disorders*. 2004;79(1):71-9.  
6  
7 35. Black SA, Markides KS, Ray LA. Depression predicts increased incidence of adverse  
8 health outcomes in older Mexican Americans with type 2 diabetes. *Diabetes care*.  
9 2003;26(10):2822-8.  
10  
11 36. Bonikowska A, Helliwell J, Hou F, Schellenberg G. An Assessment of Life Satisfaction  
12 Responses on Recent Statistics Canada Surveys. *Social Indicators Research*. 2014;118(2):617-43.  
13  
14 37. Baruth M, Lee DC, Sui X, Church TS, Marcus BH, Wilcox S, et al. Emotional outlook on life  
15 predicts increases in physical activity among initially inactive men. *Health Educ Behav*.  
16 2011;38(2):150-8.  
17  
18 38. Kim ES, Kubzansky LD, Soo J, Boehm JK. Maintaining Healthy Behavior: a Prospective  
19 Study of Psychological Well-Being and Physical Activity. *Ann Behav Med*. 2017;51(3):337-47.  
20  
21 39. Sin NL, Moskowitz JT, Whooley MA. Positive Affect and Health Behaviors Across 5 Years  
22 in Patients With Coronary Heart Disease: The Heart and Soul Study. *Psychosom Med*.  
23 2015;77(9):1058-66.  
24  
25 40. Boehm Julia K, Chen Y, Koga H, Mathur Maya B, Vie Loryana L, Kubzansky Laura D. Is  
26 Optimism Associated With Healthier Cardiovascular-Related Behavior? *Circulation Research*.  
27 2018;122(8):1119-34.  
28  
29 41. Kim ES, Strecher VJ, Ryff CD. Purpose in life and use of preventive health care services.  
30 *Proc Natl Acad Sci U S A*. 2014;111(46):16331-6.  
31  
32 42. Vuik SI, Fontana G, Mayer E, Darzi A. Do hospitalisations for ambulatory care sensitive  
33 conditions reflect low access to primary care? An observational cohort study of primary care  
34 usage prior to hospitalisation. *BMJ Open*. 2017;7(8):e015704.  
35  
36 43. Soo J, Kubzansky LD, Chen Y, Zevon ES, Boehm JK. Psychological well-being and  
37 restorative biological processes: HDL-C in older English adults. *Soc Sci Med*. 2018;209:59-66.  
38  
39  
40  
41  
42  
43  
44  
45  
46  
47  
48  
49  
50  
51  
52  
53  
54  
55  
56  
57  
58  
59  
60

1  
2  
3  
4  
5  
6  
7  
8  
9  
10  
11  
12  
13  
14  
15  
16  
17  
18  
19  
20  
21  
22  
23  
24  
25  
26  
27  
28  
29  
30  
31  
32  
33  
34  
35  
36  
37  
38  
39  
40  
41  
42  
43  
44  
45  
46  
47  
48  
49  
50  
51  
52  
53  
54  
55  
56  
57  
58  
59  
60

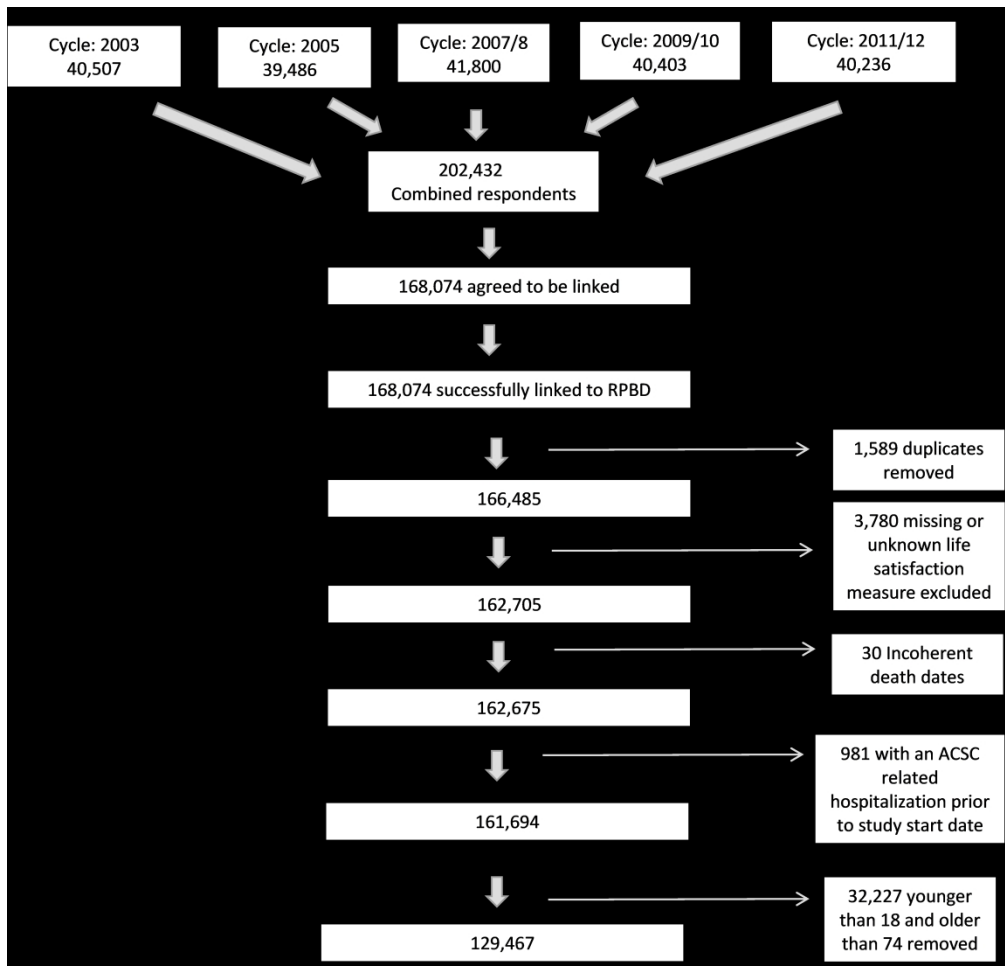

Figure 1: Flow chart of study participants



## Supplement Table 1:

ICD-10-CA/ CCI codes for ACSC hospitalizations<sup>1</sup>

| Condition                                                                                                                                                                                                                                                                                                                                                                                                                                                                                                                                                                                                                                                                                                                                                                                                                                                                                                                                                                                                                              | ICD-10-CA Code(s)                                                                                                                                                    |
|----------------------------------------------------------------------------------------------------------------------------------------------------------------------------------------------------------------------------------------------------------------------------------------------------------------------------------------------------------------------------------------------------------------------------------------------------------------------------------------------------------------------------------------------------------------------------------------------------------------------------------------------------------------------------------------------------------------------------------------------------------------------------------------------------------------------------------------------------------------------------------------------------------------------------------------------------------------------------------------------------------------------------------------|----------------------------------------------------------------------------------------------------------------------------------------------------------------------|
| Grand mal status and other epileptic convulsions                                                                                                                                                                                                                                                                                                                                                                                                                                                                                                                                                                                                                                                                                                                                                                                                                                                                                                                                                                                       | G40, G41                                                                                                                                                             |
| Chronic obstructive pulmonary disease (COPD)                                                                                                                                                                                                                                                                                                                                                                                                                                                                                                                                                                                                                                                                                                                                                                                                                                                                                                                                                                                           | J41, J42, J43, J44, J47<br><br>(only when a secondary diagnosis of J44 is also present) J10.0, J11.0, J12–J16, J18, J20, J21, J22                                    |
| Asthma                                                                                                                                                                                                                                                                                                                                                                                                                                                                                                                                                                                                                                                                                                                                                                                                                                                                                                                                                                                                                                 | J45                                                                                                                                                                  |
| Diabetes                                                                                                                                                                                                                                                                                                                                                                                                                                                                                                                                                                                                                                                                                                                                                                                                                                                                                                                                                                                                                               | E10.0, E10.1, E10.63, E10.64, E10.9<br><br>E11.0, E11.1, E11.63, E11.64, E11.9<br><br>E13.0, E13.1, E13.63, E13.64, E13.9<br><br>E14.0, E14.1, E14.63, E14.64, E14.9 |
| Hypertension*                                                                                                                                                                                                                                                                                                                                                                                                                                                                                                                                                                                                                                                                                                                                                                                                                                                                                                                                                                                                                          | I10.0, I10.1, I11                                                                                                                                                    |
| Heart Failure and pulmonary edema                                                                                                                                                                                                                                                                                                                                                                                                                                                                                                                                                                                                                                                                                                                                                                                                                                                                                                                                                                                                      | I50, J81                                                                                                                                                             |
| Angina*                                                                                                                                                                                                                                                                                                                                                                                                                                                                                                                                                                                                                                                                                                                                                                                                                                                                                                                                                                                                                                | I20, I23.82, I24.0, I24.8, I24.9                                                                                                                                     |
| <p>*Excluding cases with cardiac procedures, CCI codes for exclusion:</p> <p>1.HA.58.^, 1.HA.80.^, 1.HA.87.^, 1.HB.53.^, 1.HB.54.^, 1.HB.55.^, 1.HB.87.^, 1.HD.53.^, 1.HD.54.^, 1.HD.55.^, 1.HH.59.^, 1.HH.71.^, 1.HJ.76.^, 1.HJ.82.^, 1.HM.57.^, 1.HM.78.^, 1.HM.80.^, 1.HN.71.^, 1.HN.80.^, 1.HN.87.^, 1.HP.76.^, 1.HP.78.^, 1.HP.80.^, 1.HP.82.^, 1.HP.83.^, 1.HP.87.^, 1.HR.71.^, 1.HR.80.^, 1.HR.84.^, 1.HR.87.^, 1.HS.80.^, 1.HS.90.^, 1.HT.80.^, 1.HT.89.^, 1.HT.90.^, 1.HU.80.^, 1.HU.90.^, 1.HV.80.^, 1.HV.90.^, 1.HW.78.^, 1.HW.79.^, 1.HX.71.^, 1.HX.78.^, 1.HX.79.^, 1.HX.80.^, 1.HX.83.^, 1.HX.86.^, 1.HX.87.^, 1.HY.85.^, 1.HZ.53 rubric (except 1.HZ.53.LA-KP), 1.HZ.54.^, 1.HZ.55 rubric (except 1.HZ.55.LA-KP), 1.HZ.56.^, 1.HZ.57.^, 1.HZ.59.^, 1.HZ.80.^, 1.HZ.85.^, 1.HZ.87.^, 1.IF.83.^, 1.IJ.50.^, 1.IJ.54.GQ-AZ, 1.IJ.55.^, 1.IJ.57.^, 1.IJ.76.^, 1.IJ.80.^, 1.IJ.86.^, 1.IK.50.^, 1.IK.57.^, 1.IK.80.^, 1.IK.87.^, 1.IN.84.^, 1.LA.84.^, 1.LC.84.^, 1.LD.84.^, 1.YY.54.LA-NJ, 1.YY.54.LA-FS, 1.YY.54.LA-NM</p> |                                                                                                                                                                      |

<sup>1</sup> More information on CIHI methodology: <http://indicatorlibrary.cihi.ca/display/HSPIL/Ambulatory+Care+Sensitive+Conditions>  
For peer review only - <http://bmjopen.bmj.com/site/about/guidelines.xhtml>

Supplement Table 2: Multivariable AHRs <sup>a</sup> and 95% CIs Across Sensitivity Analyses

|                                                                                                                                                                                                                                                                                                                                                                | Five-year survival <sup>b</sup> (N= 129,467) |            | Excluding events from first two years <sup>c</sup> (N= 128,638) |            |
|----------------------------------------------------------------------------------------------------------------------------------------------------------------------------------------------------------------------------------------------------------------------------------------------------------------------------------------------------------------|----------------------------------------------|------------|-----------------------------------------------------------------|------------|
|                                                                                                                                                                                                                                                                                                                                                                | HR (95% CI)                                  | p-value    | HR (95% CI)                                                     | p-value    |
| <b>Life Satisfaction</b>                                                                                                                                                                                                                                                                                                                                       |                                              |            |                                                                 |            |
| Very Satisfied                                                                                                                                                                                                                                                                                                                                                 | (ref)                                        | (ref)      | (ref)                                                           | (ref)      |
| Satisfied                                                                                                                                                                                                                                                                                                                                                      | 1.32 (1.16 – 1.51)                           | P < 0.0001 | 1.38 (1.17 – 1.62)                                              | P < 0.0001 |
| Neither Satisfied or Dissatisfied                                                                                                                                                                                                                                                                                                                              | 1.71 (1.36 – 2.14)                           | P < 0.0001 | 1.74 (1.33 – 2.28)                                              | P < 0.0001 |
| Dissatisfied and Very Dissatisfied                                                                                                                                                                                                                                                                                                                             | 2.74 (1.89 – 3.98)                           | P < 0.0001 | 2.77 (1.69 – 4.55)                                              | P < 0.0001 |
| <sup>a</sup> All models were fully adjusted models which controlled for age, sex, physical activity, BMI, alcohol consumption, smoking status.<br><sup>b</sup> Five-year survival models were run with a consistent survival time of five years.<br><sup>c</sup> Models were run without individuals who had an event within the first two years of follow-up. |                                              |            |                                                                 |            |

Supplement Table 3: Unadjusted HRs from The Subdistribution Hazard Model <sup>a</sup>

|                                                                                 | HR (95% CI)        | p-value    |
|---------------------------------------------------------------------------------|--------------------|------------|
| <b>Life Satisfaction</b>                                                        |                    |            |
| Very Satisfied                                                                  | (ref)              | (ref)      |
| Satisfied                                                                       | 1.44 (1.30 - 1.60) | P < 0.0001 |
| Neither Satisfied or Dissatisfied                                               | 2.20 (1.86 - 2.60) | P < 0.0001 |
| Dissatisfied and Very Dissatisfied                                              | 4.38 (3.73 - 5.14) | P < 0.0001 |
| <sup>a</sup> Subdistribution hazard model considered death as a competing risk. |                    |            |

Supplement Figure 1. Kaplan Meir survival curves for Life Satisfaction (most dissatisfied = 5; lease dissatisfied = 1)

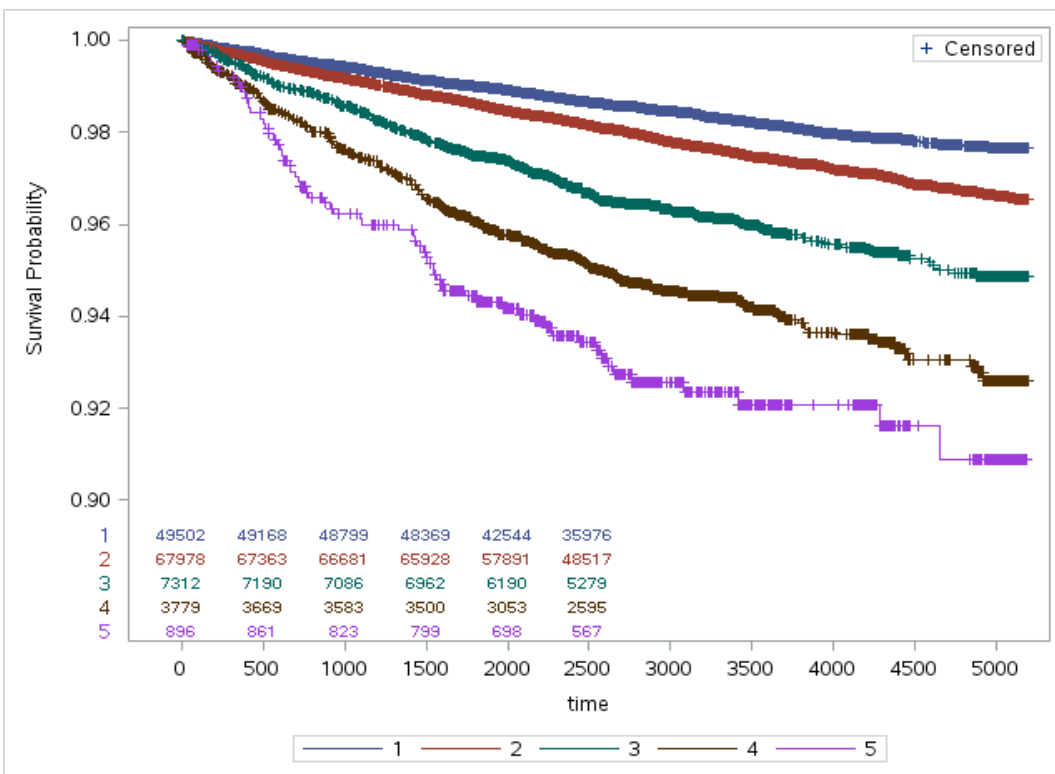

Review only

STROBE Checklist – Location of Specific Items for “The relationship between life satisfaction and preventable hospitalizations: a longitudinal population-based cohort study”

|                           | Item No | Page Number                                                                                                      |
|---------------------------|---------|------------------------------------------------------------------------------------------------------------------|
| <b>Title and abstract</b> | 1       | (a) Cover page (title page)<br>(b) Abstract: 1                                                                   |
| <b>Introduction</b>       |         |                                                                                                                  |
| Background/rationale      | 2       | 5                                                                                                                |
| Objectives                | 3       | 5 to 6                                                                                                           |
| <b>Methods</b>            |         |                                                                                                                  |
| Study design              | 4       | 6                                                                                                                |
| Setting                   | 5       | 6                                                                                                                |
| Participants              | 6       | 6                                                                                                                |
| Variables                 | 7       | 6 to 7                                                                                                           |
| Data sources/ measurement | 8       | 6 to 8                                                                                                           |
| Bias                      | 9       | 6                                                                                                                |
| Study size                | 10      | 3                                                                                                                |
| Quantitative variables    | 11      | 6 to 7                                                                                                           |
| Statistical methods       | 12      | (a) Describe all statistical methods: 6 to 8<br>(b) Subgroups and interactions: 8<br>(c) Sensitivity Analyses: 8 |
| <b>Results</b>            |         |                                                                                                                  |
| Participants              | 13      | 8 and Figure 1                                                                                                   |
| Descriptive data          | 14      | 8 and Table 1 to 2                                                                                               |
| Outcome data              | 15      | 9 and Table 3                                                                                                    |
| Main results              | 16      | 9 to 10 and Tables 3 to 4                                                                                        |
| Other analyses            | 17      | 10 and Supplement Tables 1-3                                                                                     |
| <b>Discussion</b>         |         |                                                                                                                  |
| Key results               | 18      | 10 to 11                                                                                                         |
| Limitations               | 19      | 11                                                                                                               |
| Interpretation            | 20      | 11 to 12                                                                                                         |
| Generalisability          | 21      | 10                                                                                                               |
| <b>Other information</b>  |         |                                                                                                                  |
| Funding                   | 22      | 19                                                                                                               |
